# Supplementary material for: A new class of unique quinoidal-like imidazoliumyl tetrazinides: synthesis, structure, and mechanism
Source: Royal Society of Chemistry journal article supplement (doi:10.1039/d3nj04766k), 2024-01-01
Supplement: d3nj04766k1.pdf [file d3nj04766k1.pdf]

# Supporting Information

## **A new class of unique quinoidal-like imidazoliumyl tetrazinides:**

### **Synthesis, structure and mechanism**

Yanxue Geng, Weijun Sun, Weixu Zhang, Mengyao Li, Guo Wang, Jianchun Wang\*

Department of Chemistry, Capital Normal University, Beijing 100048, P. R. China. E-mail:  
cnuwjc@cnu.edu.cn

## Table of Contents

|                                                                                                                 |    |
|-----------------------------------------------------------------------------------------------------------------|----|
| Experimental Section.....                                                                                       | 9  |
| 3-(1-methyl-1 <i>H</i> -imidazol-3-ium-3-yl)-6-oxo-3,6-dihydro-1,2,4,5-tetrazin-3-ide (3a) .....                | 9  |
| 3-(1-ethyl-1 <i>H</i> -imidazol-3-ium-3-yl)-6-oxo-3,6-dihydro-1,2,4,5-tetrazin-3-ide (3b) .....                 | 10 |
| 6-oxo-3-(1-propyl-1 <i>H</i> -imidazol-3-ium-3-yl)-3,6-dihydro-1,2,4,5-tetrazin-3-ide (3c).....                 | 10 |
| 3-(1-butyl-1 <i>H</i> -imidazol-3-ium-3-yl)-6-oxo-3,6-dihydro-1,2,4,5-tetrazin-3-ide (3d).....                  | 10 |
| 3-(1-hexyl-1 <i>H</i> -imidazol-3-ium-3-yl)-6-oxo-3,6-dihydro-1,2,4,5-tetrazin-3-ide (3e) .....                 | 10 |
| 3-(1-isopropyl-1 <i>H</i> -imidazol-3-ium-3-yl)-6-oxo-3,6-dihydro-1,2,4,5-tetrazin-3-ide (3f).....              | 11 |
| 3-(1-benzyl-1 <i>H</i> -imidazol-3-ium-3-yl)-6-oxo-3,6-dihydro-1,2,4,5-tetrazin-3-ide (3g) .....                | 11 |
| 3-(1-allyl-1 <i>H</i> -imidazol-3-ium-3-yl)-6-oxo-3,6-dihydro-1,2,4,5-tetrazin-3-ide (3h) .....                 | 11 |
| 6-oxo-3-(1-vinyl-1 <i>H</i> -imidazol-3-ium-3-yl)-3,6-dihydro-1,2,4,5-tetrazin-3-ide (3i).....                  | 11 |
| 3-(1-(cyanomethyl)-1 <i>H</i> -imidazol-3-ium-3-yl)-6-oxo-3,6-dihydro-1,2,4,5-tetrazin-3-ide (3j)<br>.....      | 12 |
| 3-(1,2-dimethyl-1 <i>H</i> -imidazol-3-ium-3-yl)-6-oxo-3,6-dihydro-1,2,4,5-tetrazin-3-ide (3k)..                | 12 |
| 3-(1-ethyl-2-methyl-1 <i>H</i> -imidazol-3-ium-3-yl)-6-oxo-3,6-dihydro-1,2,4,5-tetrazin-3-ide (3l)<br>.....     | 12 |
| 3-(1-ethyl-2-isopropyl-1 <i>H</i> -imidazol-3-ium-3-yl)-6-oxo-3,6-dihydro-1,2,4,5-tetrazin-3-ide<br>(3m) .....  | 12 |
| 3-(2-methyl-1-propyl-1 <i>H</i> -imidazol-3-ium-3-yl)-6-oxo-3,6-dihydro-1,2,4,5-tetrazin-3-ide<br>(3n) .....    | 13 |
| 3-(2-isopropyl-1-propyl-1 <i>H</i> -imidazol-3-ium-3-yl)-6-oxo-3,6-dihydro-1,2,4,5-tetrazin-3-ide<br>(3o) ..... | 13 |
| 3-(1-butyl-2-methyl-1 <i>H</i> -imidazol-3-ium-3-yl)-6-oxo-3,6-dihydro-1,2,4,5-tetrazin-3-ide (3p)<br>.....     | 13 |
| 3-(1-butyl-2-isopropyl-1 <i>H</i> -imidazol-3-ium-3-yl)-6-oxo-3,6-dihydro-1,2,4,5-tetrazin-3-ide<br>(3q) .....  | 13 |
| 3-(1-isopropyl-2-methyl-1 <i>H</i> -imidazol-3-ium-3-yl)-6-oxo-3,6-dihydro-1,2,4,5-tetrazin-3-ide<br>(3r).....  | 14 |

|                                                                                                                                               |    |
|-----------------------------------------------------------------------------------------------------------------------------------------------|----|
| 3-(1-hexyl-2-methyl-1 <i>H</i> -imidazol-3-ium-3-yl)-6-oxo-3,6-dihydro-1,2,4,5-tetrazin-3-ide (3s)<br>.....                                   | 14 |
| 3-(1-isobutyl-2-methyl-1 <i>H</i> -imidazol-3-ium-3-yl)-6-oxo-3,6-dihydro-1,2,4,5-tetrazin-3-ide<br>(3t) .....                                | 14 |
| 3-(2-methyl-1-(3-phenylpropyl)-1 <i>H</i> -imidazol-3-ium-3-yl)-6-oxo-3,6-dihydro-1,2,4,5-<br>tetrazin-3-ide (3u) .....                       | 14 |
| 3-(2-isopropyl-1-(3-phenylpropyl)-1 <i>H</i> -imidazol-3-ium-3-yl)-6-oxo-3,6-dihydro-1,2,4,5-<br>tetrazin-3-ide (3v) .....                    | 15 |
| 3-(1-benzyl-2-methyl-1 <i>H</i> -imidazol-3-ium-3-yl)-6-oxo-3,6-dihydro-1,2,4,5-tetrazin-3-ide<br>(3w) .....                                  | 15 |
| 3-(1-cyclopentyl-1 <i>H</i> -imidazol-3-ium-3-yl)-6-oxo-3,6-dihydro-1,2,4,5-tetrazin-3-ide (3x)                                               | 15 |
| 3-(1-cyclohexyl-1 <i>H</i> -imidazol-3-ium-3-yl)-6-oxo-3,6-dihydro-1,2,4,5-tetrazin-3-ide (3y)..                                              | 16 |
| 3-(1-cyclopentyl-1 <i>H</i> -benzo[ <i>d</i> ]imidazol-3-ium-3-yl)-6-oxo-3,6-dihydro-1,2,4,5-tetrazin-3-<br>ide (3z).....                     | 16 |
| 3-(1-cyclohexyl-1 <i>H</i> -benzo[ <i>d</i> ]imidazol-3-ium-3-yl)-6-oxo-3,6-dihydro-1,2,4,5-tetrazin-3-<br>ide (3aa).....                     | 16 |
| 3-(1-(naphthalen-2-yl)-1 <i>H</i> -imidazol-3-ium-3-yl)-6-oxo-3,6-dihydro-1,2,4,5-tetrazin-3-ide<br>(3ab).....                                | 17 |
| 3-(1-(naphthalen-1-yl)-1 <i>H</i> -imidazol-3-ium-3-yl)-6-oxo-3,6-dihydro-1,2,4,5-tetrazin-3-ide<br>(3ac).....                                | 17 |
| 3-(1-(4-(1 <i>H</i> -imidazol-1-yl)naphthalen-1-yl)-1 <i>H</i> -imidazol-3-ium-3-yl)-6-oxo-3,6-dihydro-<br>1,2,4,5-tetrazin-3-ide (3ad) ..... | 17 |
| 3-(1-(anthracen-2-yl)-1 <i>H</i> -imidazol-3-ium-3-yl)-6-oxo-3,6-dihydro-1,2,4,5-tetrazin-3-ide<br>(3ae).....                                 | 17 |
| 3-(1-(anthracen-9-yl)-1 <i>H</i> -imidazol-3-ium-3-yl)-6-oxo-3,6-dihydro-1,2,4,5-tetrazin-3-ide<br>(3af) .....                                | 18 |
| 6-oxo-3-(1-(4-(trifluoromethyl)phenyl)-1 <i>H</i> -imidazol-3-ium-3-yl)-3,6-dihydro-1,2,4,5-<br>tetrazin-3-ide (3ag) .....                    | 18 |
| 3-(1-cyclopentyl-2,4-dimethyl-1 <i>H</i> -imidazol-3-ium-3-yl)-6-oxo-3,6-dihydro-1,2,4,5-<br>tetrazin-3-ide (3ah) .....                       | 18 |
| 3-(1-cyclopentyl-5-(methoxycarbonyl)-1 <i>H</i> -imidazol-3-ium-3-yl)-6-oxo-3,6-dihydro-<br>1,2,4,5-tetrazin-3-ide (3ai).....                 | 19 |
| 3-(imidazo[1,2- $\alpha$ ]pyridin-1-ium-1-yl)-6-oxo-3,6-dihydro-1,2,4,5-tetrazin-3-ide (3aj) .....                                            | 19 |

|                                                                                                     |    |
|-----------------------------------------------------------------------------------------------------|----|
| 3-(5-acetyl-4-methyl-1H-imidazol-3-ium-3-yl)-6-oxo-3,6-dihydro-1,2,4,5-tetrazin-3-ide<br>(3ak)..... | 19 |
| Figure and scheme .....                                                                             | 20 |
| Figure S1. <sup>1</sup> H-NMR spectra of 3a in DMSO- <i>d</i> <sub>6</sub> .....                    | 20 |
| Figure S2. <sup>13</sup> C-NMR spectra of 3a in DMSO- <i>d</i> <sub>6</sub> .....                   | 21 |
| Figure S3. HRMS spectra of 3a in DMSO- <i>d</i> <sub>6</sub> .....                                  | 21 |
| Figure S4. IR spectra of 3a .....                                                                   | 22 |
| Figure S5. <sup>1</sup> H-NMR spectra of 3b in DMSO- <i>d</i> <sub>6</sub> .....                    | 22 |
| Figure S6. <sup>13</sup> C-NMR spectra of 3b in DMSO- <i>d</i> <sub>6</sub> .....                   | 23 |
| Figure S7. HRMS spectra of 3b in DMSO- <i>d</i> <sub>6</sub> .....                                  | 23 |
| Figure S8. IR spectra of 3b .....                                                                   | 24 |
| Figure S9. <sup>1</sup> H-NMR spectra of 3c in DMSO- <i>d</i> <sub>6</sub> .....                    | 24 |
| Figure S10. <sup>13</sup> C-NMR spectra of 3c in DMSO- <i>d</i> <sub>6</sub> .....                  | 25 |
| Figure S11. HRMS spectra of 3c in DMSO- <i>d</i> <sub>6</sub> .....                                 | 25 |
| Figure S12. <sup>1</sup> H-NMR spectra of 3d in DMSO- <i>d</i> <sub>6</sub> .....                   | 26 |
| Figure S13. <sup>13</sup> C-NMR spectra of 3d in DMSO- <i>d</i> <sub>6</sub> .....                  | 26 |
| Figure S14. HRMS spectra of 3d in DMSO- <i>d</i> <sub>6</sub> .....                                 | 27 |
| Figure S15. <sup>1</sup> H-NMR spectra of 3e in DMSO- <i>d</i> <sub>6</sub> .....                   | 27 |
| Figure S16. <sup>13</sup> C-NMR spectra of 3e in DMSO- <i>d</i> <sub>6</sub> .....                  | 28 |
| Figure S17. HRMS spectra of 3e in DMSO- <i>d</i> <sub>6</sub> .....                                 | 28 |
| Figure S18. <sup>1</sup> H-NMR spectra of 3f in DMSO- <i>d</i> <sub>6</sub> .....                   | 29 |
| Figure S19. <sup>13</sup> C-NMR spectra of 3f in DMSO- <i>d</i> <sub>6</sub> .....                  | 29 |
| Figure S20. HRMS spectra of 3f in DMSO- <i>d</i> <sub>6</sub> .....                                 | 30 |
| Figure S21. <sup>1</sup> H-NMR spectra of 3g in DMSO- <i>d</i> <sub>6</sub> .....                   | 30 |
| Figure S22. <sup>13</sup> C-NMR spectra of 3g in DMSO- <i>d</i> <sub>6</sub> .....                  | 31 |
| Figure S23. HRMS spectra of 3g in DMSO- <i>d</i> <sub>6</sub> .....                                 | 31 |
| Figure S24. <sup>1</sup> H-NMR spectra of 3h in DMSO- <i>d</i> <sub>6</sub> .....                   | 32 |
| Figure S25. <sup>13</sup> C-NMR spectra of 3h in DMSO- <i>d</i> <sub>6</sub> .....                  | 32 |
| Figure S26. HRMS spectra of 3h in DMSO- <i>d</i> <sub>6</sub> .....                                 | 33 |
| Figure S27. IR spectra of 3h .....                                                                  | 33 |

|                                                                            |    |
|----------------------------------------------------------------------------|----|
| Figure S28. $^1\text{H-NMR}$ spectra of 3i in $\text{DMSO-}d_6$ .....      | 34 |
| Figure S29. $^{13}\text{C-NMR}$ spectra of 3i in $\text{DMSO-}d_6$ .....   | 34 |
| Figure S30. HRMS spectra of 3i in $\text{DMSO-}d_6$ .....                  | 35 |
| Figure S31. $^1\text{H-NMR}$ spectra of 3j in $\text{DMSO-}d_6$ .....      | 35 |
| Figure S32. $^{13}\text{C-NMR}$ spectra of 3j in $\text{DMSO-}d_6$ .....   | 36 |
| Figure S33. HRMS spectra of 3j in $\text{DMSO-}d_6$ .....                  | 36 |
| Figure S34. $^1\text{H-NMR}$ spectra of 3k in $\text{DMSO-}d_6$ .....      | 37 |
| Figure S35. $^{13}\text{C-NMR}$ spectra of 3k in $\text{DMSO-}d_6$ .....   | 37 |
| Figure S36. HRMS spectra of 3k in $\text{DMSO-}d_6$ .....                  | 38 |
| Figure S37. HRMS spectra of 3k- $^{18}\text{O}$ in $\text{DMSO-}d_6$ ..... | 38 |
| Figure S38. $^1\text{H-NMR}$ spectra of 3l in $\text{DMSO-}d_6$ .....      | 39 |
| Figure S39. $^{13}\text{C-NMR}$ spectra of 3l in $\text{DMSO-}d_6$ .....   | 39 |
| Figure S40. HRMS spectra of 3l in $\text{DMSO-}d_6$ .....                  | 40 |
| Figure S41. IR spectra of 3l.....                                          | 40 |
| Figure S42. $^1\text{H-NMR}$ spectra of 3m in $\text{DMSO-}d_6$ .....      | 41 |
| Figure S43. $^{13}\text{C-NMR}$ spectra of 3m in $\text{DMSO-}d_6$ .....   | 41 |
| Figure S44. HRMS spectra of 3m in $\text{DMSO-}d_6$ .....                  | 42 |
| Figure S45. $^1\text{H-NMR}$ spectra of 3n in $\text{DMSO-}d_6$ .....      | 42 |
| Figure S46. $^{13}\text{C-NMR}$ spectra of 3n in $\text{DMSO-}d_6$ .....   | 43 |
| Figure S47. HRMS spectra of 3n in $\text{DMSO-}d_6$ .....                  | 43 |
| Figure S48. IR spectra of 3n.....                                          | 44 |
| Figure S49. $^1\text{H-NMR}$ spectra of 3o in $\text{DMSO-}d_6$ .....      | 44 |
| Figure S50. $^{13}\text{C-NMR}$ spectra of 3o in $\text{DMSO-}d_6$ .....   | 45 |
| Figure S51. HRMS spectra of 3o in $\text{DMSO-}d_6$ .....                  | 45 |
| Figure S52. IR spectra of 3o.....                                          | 46 |
| Figure S53. $^1\text{H-NMR}$ spectra of 3p in $\text{DMSO-}d_6$ .....      | 46 |
| Figure S54. $^{13}\text{C-NMR}$ spectra of 3p in $\text{DMSO-}d_6$ .....   | 47 |
| Figure S55. HRMS spectra of 3p in $\text{DMSO-}d_6$ .....                  | 47 |
| Figure S56. $^1\text{H-NMR}$ spectra of 3q in $\text{DMSO-}d_6$ .....      | 48 |
| Figure S57. $^{13}\text{C-NMR}$ spectra of 3q in $\text{DMSO-}d_6$ .....   | 48 |

|                                                                     |    |
|---------------------------------------------------------------------|----|
| Figure S58. HRMS spectra of 3q in DMSO- $d_6$ .....                 | 49 |
| Figure S59. $^1\text{H}$ -NMR spectra of 3r in DMSO- $d_6$ .....    | 49 |
| Figure S60. $^{13}\text{C}$ -NMR spectra of 3r in DMSO- $d_6$ ..... | 50 |
| Figure S61. HRMS spectra of 3r in DMSO- $d_6$ .....                 | 50 |
| Figure S62. $^1\text{H}$ -NMR spectra of 3s in DMSO- $d_6$ .....    | 51 |
| Figure S63. $^{13}\text{C}$ -NMR spectra of 3s in DMSO- $d_6$ ..... | 51 |
| Figure S64. HRMS spectra of 3s in DMSO- $d_6$ .....                 | 52 |
| Figure S65. IR spectra of 3s.....                                   | 52 |
| Figure S66. $^1\text{H}$ -NMR spectra of 3t in DMSO- $d_6$ .....    | 53 |
| Figure S67. $^{13}\text{C}$ -NMR spectra of 3t in DMSO- $d_6$ ..... | 54 |
| Figure S68. HRMS spectra of 3t in DMSO- $d_6$ .....                 | 54 |
| Figure S69. $^1\text{H}$ -NMR spectra of 3u in DMSO- $d_6$ .....    | 54 |
| Figure S70. $^{13}\text{C}$ -NMR spectra of 3u in DMSO- $d_6$ ..... | 55 |
| Figure S71. HRMS spectra of 3u in DMSO- $d_6$ .....                 | 55 |
| Figure S72. $^1\text{H}$ -NMR spectra of 3v in DMSO- $d_6$ .....    | 56 |
| Figure S73. $^{13}\text{C}$ -NMR spectra of 3v in DMSO- $d_6$ ..... | 56 |
| Figure S74. HRMS spectra of 3v in DMSO- $d_6$ .....                 | 57 |
| Figure S75. $^1\text{H}$ -NMR spectra of 3w in DMSO- $d_6$ .....    | 57 |
| Figure S76. $^{13}\text{C}$ -NMR spectra of 3w in DMSO- $d_6$ ..... | 58 |
| Figure S77. HRMS spectra of 3w in DMSO- $d_6$ .....                 | 58 |
| Figure S78. IR spectra of 3w.....                                   | 59 |
| Figure S79. $^1\text{H}$ -NMR spectra of 3x in DMSO- $d_6$ .....    | 59 |
| Figure S80. $^{13}\text{C}$ -NMR spectra of 3x in DMSO- $d_6$ ..... | 60 |
| Figure S81. HRMS spectra of 3x in DMSO- $d_6$ .....                 | 60 |
| Figure S82. $^1\text{H}$ -NMR spectra of 3y in DMSO- $d_6$ .....    | 61 |
| Figure S83. $^{13}\text{C}$ -NMR spectra of 3y in DMSO- $d_6$ ..... | 61 |
| Figure S84. HRMS spectra of 3y in DMSO- $d_6$ .....                 | 62 |
| Figure S85. $^1\text{H}$ -NMR spectra of 3z in DMSO- $d_6$ .....    | 62 |
| Figure S86. $^{13}\text{C}$ -NMR spectra of 3z in DMSO- $d_6$ ..... | 63 |
| Figure S87. HRMS spectra of 3z in DMSO- $d_6$ .....                 | 63 |

|                                                                            |    |
|----------------------------------------------------------------------------|----|
| Figure S88. $^1\text{H-NMR}$ spectra of 3aa in $\text{DMSO-}d_6$ .....     | 64 |
| Figure S89. $^{13}\text{C-NMR}$ spectra of 3aa in $\text{DMSO-}d_6$ .....  | 64 |
| Figure S90. HRMS spectra of 3aa in $\text{DMSO-}d_6$ .....                 | 65 |
| Figure S91. $^1\text{H-NMR}$ spectra of 3ab in $\text{DMSO-}d_6$ .....     | 65 |
| Figure S92. $^{13}\text{C-NMR}$ spectra of 3ab in $\text{DMSO-}d_6$ .....  | 66 |
| Figure S93. HRMS spectra of 3ab in $\text{DMSO-}d_6$ .....                 | 66 |
| Figure S94. $^1\text{H-NMR}$ spectra of 3ac in $\text{DMSO-}d_6$ .....     | 67 |
| Figure S95. $^{13}\text{C-NMR}$ spectra of 3ac in $\text{DMSO-}d_6$ .....  | 67 |
| Figure S96. HRMS spectra of 3ac in $\text{DMSO-}d_6$ .....                 | 68 |
| Figure S97. $^1\text{H-NMR}$ spectra of 3ad in $\text{DMSO-}d_6$ .....     | 68 |
| Figure S98. $^{13}\text{C-NMR}$ spectra of 3ad in $\text{DMSO-}d_6$ .....  | 69 |
| Figure S99. HRMS spectra of 3ad in $\text{DMSO-}d_6$ .....                 | 69 |
| Figure S100. $^1\text{H-NMR}$ spectra of 3ae in $\text{DMSO-}d_6$ .....    | 70 |
| Figure S101. $^{13}\text{C-NMR}$ spectra of 3ae in $\text{DMSO-}d_6$ ..... | 70 |
| Figure S102. HRMS spectra of 3ae in $\text{DMSO-}d_6$ .....                | 71 |
| Figure S103. $^1\text{H-NMR}$ spectra of 3af in $\text{DMSO-}d_6$ .....    | 71 |
| Figure S104. $^{13}\text{C-NMR}$ spectra of 3af in $\text{DMSO-}d_6$ ..... | 72 |
| Figure S105. HRMS spectra of 3af in $\text{DMSO-}d_6$ .....                | 72 |
| Figure S106. $^1\text{H-NMR}$ spectra of 3ag in $\text{DMSO-}d_6$ .....    | 73 |
| Figure S107. $^{13}\text{C-NMR}$ spectra of 3ag in $\text{DMSO-}d_6$ ..... | 73 |
| Figure S108. HRMS spectra of 3ag in $\text{DMSO-}d_6$ .....                | 74 |
| Figure S109. $^1\text{H-NMR}$ spectra of 3ah in $\text{DMSO-}d_6$ .....    | 74 |
| Figure S110. $^{13}\text{C-NMR}$ spectra of 3ah in $\text{DMSO-}d_6$ ..... | 75 |
| Figure S111. HRMS spectra of 3ah in $\text{DMSO-}d_6$ .....                | 75 |
| Figure S112. $^1\text{H-NMR}$ spectra of 3ai in $\text{DMSO-}d_6$ .....    | 76 |
| Figure S113. $^{13}\text{C-NMR}$ spectra of 3ai in $\text{DMSO-}d_6$ ..... | 76 |
| Figure S114. HRMS spectra of 3ai in $\text{DMSO-}d_6$ .....                | 77 |
| Figure S115. $^1\text{H-NMR}$ spectra of 3aj in $\text{DMSO-}d_6$ .....    | 77 |
| Figure S116. $^{13}\text{C-NMR}$ spectra of 3aj in $\text{DMSO-}d_6$ ..... | 78 |
| Figure S117. HRMS spectra of 3aj in $\text{DMSO-}d_6$ .....                | 78 |

|                                                                                                                                                   |    |
|---------------------------------------------------------------------------------------------------------------------------------------------------|----|
| Figure S118. $^1\text{H}$ -NMR spectra of 3ak in $\text{DMSO-}d_6$ .....                                                                          | 79 |
| Figure S119. $^{13}\text{C}$ -NMR spectra of 3ak in $\text{DMSO-}d_6$ .....                                                                       | 79 |
| Figure S120. HRMS spectra of 3ak in $\text{DMSO-}d_6$ .....                                                                                       | 80 |
| Figure S121. X-ray structure of 3a .....                                                                                                          | 80 |
| Figure S122. X-ray structure of 3z.....                                                                                                           | 82 |
| Figure S123. X-ray structure of 3aa .....                                                                                                         | 85 |
| Figure S124. X-ray structure of 3ab .....                                                                                                         | 88 |
| Figure S125. X-ray single crystal structure of $\text{Pd(II)Cl}_4 \cdot 1,2\text{-dimethylimidazole complex(4k)}$<br>.....                        | 91 |
| Figure S126. Charge density maps of each atom in 3a calculated from the B3LYP functional<br>and the 6-31+G* basis set in Gaussian03 program ..... | 92 |



## Experimental Section

Most materials and reagents were purchased from commercial suppliers and used without further purification. Compound **1** was prepared according to the literature [1,2]. Anhydrous tetrahydrofuran was first dried by molecular sieve overnight, and then refluxed with potassium and benzophenone to dark blue. <sup>1</sup>H and <sup>13</sup>C NMR spectra were mainly recorded on 600 MHz Varian VNMR Spectrometer (Some samples were completed on Bruker AVANCE 400/700 MHz during the epidemic.), using D<sub>2</sub>O or DMSO-*d*<sub>6</sub> as solvent. High-resolution mass spectroscopy (HRMS) was performed on a Bruker APEXII FT-ICR mass spectrometer. Melting points were measured on a WRS-1B micro-melting point apparatus (YiCe, Shanghai).

### Synthesis of imidazoliumyl tetrazinide

A general method was used to synthesize **3a-3z**, **3aa-3ak** and we provide the method for synthesis of **3a**. In a three-neck flask, 3,6-dichlorotetrazine (90mg, 0.6mmol) was dissolved in THF (20mL). The mixture was stirred for 10 min at temperature of fluxing. Then 1-methylimidazole (57μL, 0.8mmol) was added slowly, a red solid was precipitated immediately. The slurry was stirred at 60°C for 3 hr. After filtration and washing with THF, the red solid was chromatographed on silicon gel column, and the second orange band was collected, when eluent was ethyl acetate and methanol ( $V_{\text{ethyl acetate}}/V_{\text{methanol}}=2:1$ ). After all the solvents were evaporated, a red solid (83mg, 87%) was obtained.

Gram-scale preparation of **3a**. At room temperature, in a three-neck flask, 3,6-dichlorotetrazine (1324.2mg, 9mmol) was dissolved in THF (300.0mL). The mixture was stirred for 10 min at temperature of fluxing. Then 1-methylimidazole (450ul, 10.8mmol) was added slowly, a red solid was precipitated immediately. The slurry was stirred at 60°C for 3 hr. After filtration and washing with THF, the red solid was chromatographed on silicon gel column, and the second orange band was collected, when eluent was ethyl acetate and methanol ( $V_{\text{ethyl acetate}}/V_{\text{methanol}}=2:1$ ). After all the solvents were evaporated, a red solid (757.5mg, 47%) was obtained.

#### 3-(1-methyl-1H-imidazol-3-ium-3-yl)-6-oxo-3,6-dihydro-1,2,4,5-tetrazin-3-ide (**3a**)

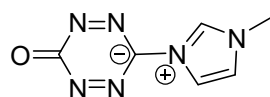

83mg red solid, yield: 87%. Mp: 259.7-260.1°C. HRMS (ESI)  $m/z$  calculated for C<sub>6</sub>H<sub>7</sub>N<sub>6</sub>O[M+H]<sup>+</sup>, 179.0676; found 179.0681. <sup>1</sup>H NMR (600 MHz, DMSO-*d*<sub>6</sub>, ppm) δ 9.87 (s, 1H), 8.29 (s, 1H), 7.92 (s, 1H), 3.96 (s, 3H); <sup>13</sup>C NMR (151 MHz, DMSO-*d*<sub>6</sub>, ppm) δ 165.55, 148.94, 134.18, 124.85, 118.79, 36.63. IR: (cm<sup>-1</sup>)=3426, 3416, 3117, 1629, 1594, 1552, 1433, 1399, 1251, 1093, 1042, 969, 878, 836, 809, 773, 643, 569.

[1] M. D. Helm, A. Plant and J. P. Harrity, *Org Biomol Chem*, 2006, **4**, 4278-4280.

[2] J. Zhu, J. Hiltz, R. B. Lennox, R. Schirrmacher, *Chem. Commun.*, 2013, **49**, 10275–10277.

### 3-(1-ethyl-1*H*-imidazol-3-ium-3-yl)-6-oxo-3,6-dihydro-1,2,4,5-tetrazin-3-ide (3b)

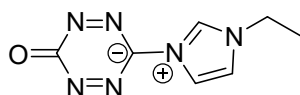

80mg red solid, yield: 70%. Mp: 201.0-202.7°C. HRMS (ESI)  $m/z$  calculated for  $C_7H_9N_6O$   $[M+H]^+$ , 193.0832; found 193.0831.  $^1H$  NMR (600 MHz, DMSO- $d_6$ , ppm)  $\delta$  9.93 (t,  $J = 1.7$  Hz, 1H), 8.30 (t,  $J = 1.9$  Hz, 1H), 8.04 (t,  $J = 1.9$  Hz, 1H), 4.32 (q,  $J = 7.3$  Hz, 2H), 1.49 (t,  $J = 7.3$  Hz, 3H);  $^{13}C$  NMR (151 MHz, DMSO- $d_6$ , ppm)  $\delta$  165.67, 149.02, 133.44, 123.38, 119.01, 45.24, 15.51. IR: ( $cm^{-1}$ )=3379, 3141, 3042, 2980, 1639, 1574, 1547, 1462, 1401, 1226, 1156, 1088, 1049, 970, 893, 790, 715, 632, 585.

### 6-oxo-3-(1-propyl-1*H*-imidazol-3-ium-3-yl)-3,6-dihydro-1,2,4,5-tetrazin-3-ide (3c)

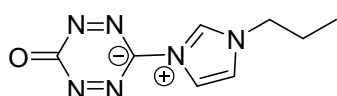

80mg crimson solid, yield: 65%. Mp: 232.3-233.0°C. HRMS (ESI)  $m/z$  calculated for  $C_8H_{11}N_6O$   $[M+H]^+$ , 207.0989; found 207.0988.  $^1H$  NMR (600 MHz, DMSO- $d_6$ , ppm)  $\delta$  9.99 (t,  $J = 1.6$  Hz, 1H), 8.32 (t,  $J = 1.9$  Hz, 1H), 8.07 (t,  $J = 1.8$  Hz, 1H), 4.27 (t,  $J = 7.1$  Hz, 2H), 1.89 (h,  $J = 7.2$  Hz, 2H), 0.88 (t,  $J = 7.4$  Hz, 3H);  $^{13}C$  NMR (151 MHz, DMSO- $d_6$ , ppm)  $\delta$  165.65, 149.02, 133.69, 123.70, 119.03, 51.22, 23.19, 10.83.

### 3-(1-butyl-1*H*-imidazol-3-ium-3-yl)-6-oxo-3,6-dihydro-1,2,4,5-tetrazin-3-ide (3d)

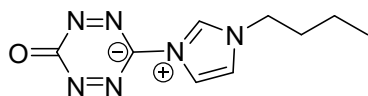

86mg crimson solid, yield: 65%. Mp: 224.3-226.4°C. HRMS (ESI)  $m/z$  calculated for  $C_9H_{13}N_6O$   $[M+H]^+$ , 221.1145; found 221.1141.  $^1H$  NMR (600 MHz, DMSO- $d_6$ , ppm)  $\delta$  9.98 (t,  $J = 1.7$  Hz, 1H), 8.32 (t,  $J = 1.9$  Hz, 1H), 8.06 (t,  $J = 1.9$  Hz, 1H), 4.30 (t,  $J = 7.2$  Hz, 2H), 1.88 – 1.82 (m, 2H), 1.33 – 1.26 (m, 2H), 0.91 (t,  $J = 7.4$  Hz, 3H);  $^{13}C$  NMR (151 MHz, DMSO- $d_6$ , ppm)  $\delta$  165.66, 149.02, 133.67, 123.67, 119.04, 49.50, 31.67, 19.20, 13.72.

### 3-(1-hexyl-1*H*-imidazol-3-ium-3-yl)-6-oxo-3,6-dihydro-1,2,4,5-tetrazin-3-ide (3e)

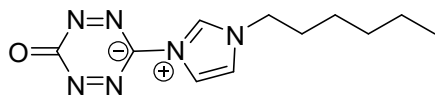

113mg crimson solid, yield: 76%. Mp: 223.4-226.3°C. HRMS (ESI)  $m/z$  calculated for  $C_{11}H_{17}N_6O$   $[M+H]^+$ , 249.1458; found 249.1461.  $^1H$  NMR (600 MHz, DMSO- $d_6$ , ppm)  $\delta$  9.99 (d,  $J = 2.6$  Hz, 1H), 8.32 (t,  $J = 1.9$  Hz, 1H), 8.07 (t,  $J = 2.3$  Hz, 1H), 4.30 (t,  $J = 7.3$  Hz, 2H), 1.87 (p,  $J = 7.1$  Hz, 2H), 1.29 – 1.26 (m, 6H), 0.86 (m, 3H);  $^{13}C$  NMR (151 MHz, DMSO- $d_6$ , ppm)  $\delta$  165.63, 149.01, 133.67, 123.68, 119.03, 49.77, 30.97, 29.65, 25.55, 22.29, 14.26.

### 3-(1-isopropyl-1H-imidazol-3-ium-3-yl)-6-oxo-3,6-dihydro-1,2,4,5-tetrazin-3-ide (3f)

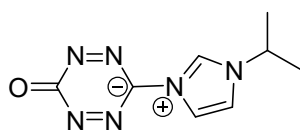

97mg amaranth solid, yield: 79%. Mp: 229.8-231.8°C. HRMS (ESI)  $m/z$  calculated for  $C_8H_{11}N_6O$   $[M+H]^+$ , 207.0989; found 207.0991.  $^1H$  NMR (600 MHz, DMSO- $d_6$ , ppm)  $\delta$  9.98 (d,  $J = 2.2$  Hz, 1H), 8.33 (d,  $J = 1.9$  Hz, 1H), 8.18 (t,  $J = 1.9$  Hz, 1H), 4.82 (p,  $J = 6.7$  Hz, 1H), 1.55 (d,  $J = 6.7$  Hz, 6H);  $^{13}C$  NMR (151 MHz, DMSO- $d_6$ , ppm)  $\delta$  165.63, 149.02, 132.60, 121.74, 119.23, 53.45, 22.65.

### 3-(1-benzyl-1H-imidazol-3-ium-3-yl)-6-oxo-3,6-dihydro-1,2,4,5-tetrazin-3-ide (3g)

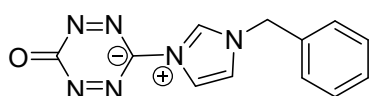

96mg amaranth solid, yield: 63%. Mp: 164.0-166.4°C. HRMS (ESI)  $m/z$  calculated for  $C_{12}H_{11}N_6O$   $[M+H]^+$ , 255.0989; found 255.0985.  $^1H$  NMR (600 MHz, DMSO- $d_6$ , ppm)  $\delta$  10.14 (s, 1H), 8.32 (s, 1H), 8.02 (s, 1H), 7.52 (d,  $J = 7.4$  Hz, 2H), 7.41 (dt,  $J = 23.7, 7.4$  Hz, 3H), 5.54 (s, 2H);  $^{13}C$  NMR (151 MHz, DMSO- $d_6$ , ppm)  $\delta$  165.58, 148.98, 135.08, 133.79, 129.40, 129.23, 128.84, 123.56, 119.46, 52.77.

### 3-(1-allyl-1H-imidazol-3-ium-3-yl)-6-oxo-3,6-dihydro-1,2,4,5-tetrazin-3-ide (3h)

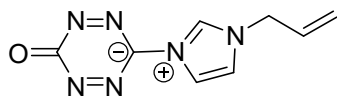

87mg amaranth solid, yield: 75%. Mp: 219.7-220.3°C. HRMS (ESI)  $m/z$  calculated for  $C_8H_9N_6O$   $[M+H]^+$ , 205.0832; found 205.0831.  $^1H$  NMR (600 MHz, DMSO- $d_6$ , ppm)  $\delta$  9.98 (d,  $J = 1.7$  Hz, 1H), 8.33 (t,  $J = 1.9$  Hz, 1H), 7.99 (t,  $J = 1.9$  Hz, 1H), 6.15 - 6.08 (m, 1H), 5.40 - 5.35 (m, 2H), 4.99 (dd,  $J = 6.0, 1.5$  Hz, 2H);  $^{13}C$  NMR (151 MHz, DMSO- $d_6$ , ppm)  $\delta$  165.64, 149.01, 133.77, 132.03, 123.69, 120.85, 119.19, 51.67. IR: (cm $^{-1}$ )=3426, 3180, 3137, 3095, 2978, 1967, 1619, 1593, 1542, 1448, 1429, 1404, 1371, 1276, 1247, 1219, 1091, 1043, 1018, 980, 946, 838, 760, 748, 628, 569.

### 6-oxo-3-(1-vinyl-1H-imidazol-3-ium-3-yl)-3,6-dihydro-1,2,4,5-tetrazin-3-ide (3i)

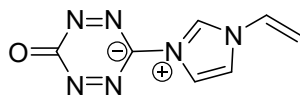

68mg amaranth solid, yield: 64%. Mp: 169.7-175.5°C. HRMS (ESI)  $m/z$  calculated for  $C_7H_7N_6O$   $[M+H]^+$ , 191.0676; found 191.0676.  $^1H$  NMR (600 MHz, DMSO- $d_6$ , ppm)  $\delta$  10.29 (t,  $J = 1.7$  Hz, 1H), 8.50 (t,  $J = 2.0$  Hz, 1H), 8.46 (t,  $J = 2.0$  Hz, 1H), 7.44 (dd,  $J = 15.7, 8.8$  Hz, 1H), 6.20 (dd,  $J = 15.7, 2.5$  Hz, 1H), 5.51 (dd,  $J = 8.8, 2.5$  Hz, 1H);  $^{13}C$  NMR (151 MHz, DMSO- $d_6$ , ppm)  $\delta$  165.56, 148.80, 132.54, 129.18, 120.28, 119.66, 110.04.

**3-(1-(cyanomethyl)-1H-imidazol-3-ium-3-yl)-6-oxo-3,6-dihydro-1,2,4,5-tetrazin-3-ide (3j)**

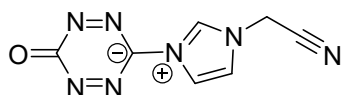

79mg amaranth solid, yield: 65%. Mp: 239.1-244.2°C. HRMS (ESI)  $m/z$  calculated for  $C_7H_6N_7O$   $[M+H]^+$   $m/z$ , 204.0628; found 204.0627.  $^1H$  NMR (600 MHz, DMSO- $d_6$ , ppm)  $\delta$  10.09 (d,  $J = 1.8$  Hz, 1H), 8.39 (t,  $J = 1.9$  Hz, 1H), 8.18 (t,  $J = 1.9$  Hz, 1H), 5.74 (s, 2H);  $^{13}C$  NMR (151 MHz, DMSO- $d_6$ , ppm)  $\delta$  165.57, 148.88, 134.91, 123.89, 119.56, 114.95, 37.68.

**3-(1,2-dimethyl-1H-imidazol-3-ium-3-yl)-6-oxo-3,6-dihydro-1,2,4,5-tetrazin-3-ide (3k)**

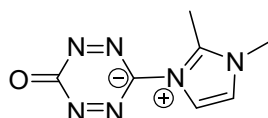

89mg orange red solid, yield: 78%. Mp: 169.8-171.2°C. HRMS (ESI)  $m/z$  calculated for  $C_7H_8N_6O$   $[M+H]^+$ , 193.0832; found 193.0831.  $^1H$  NMR (600 MHz, DMSO- $d_6$ , ppm)  $\delta$  8.07 (d,  $J = 2.2$  Hz, 1H), 7.87 (d,  $J = 2.2$  Hz, 1H), 3.87 (s, 3H), 2.69 (s, 3H);  $^{13}C$  NMR (151 MHz, DMSO- $d_6$ , ppm)  $\delta$  164.36, 150.07, 145.07, 123.41, 120.41, 35.54, 11.28.

**3-(1-ethyl-2-methyl-1H-imidazol-3-ium-3-yl)-6-oxo-3,6-dihydro-1,2,4,5-tetrazin-3-ide (3l)**

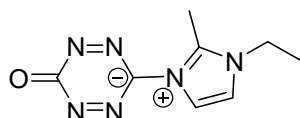

74mg amaranth solid, yield: 60%. Mp: 221.6-223.8°C. HRMS (ESI)  $m/z$  calculated for  $C_8H_{11}N_6O$   $[M+H]^+$ , 207.0989; found 207.0985.  $^1H$  NMR (600 MHz, DMSO- $d_6$ , ppm)  $\delta$  8.11 (d,  $J = 2.2$  Hz, 1H), 7.92 (d,  $J = 2.2$  Hz, 1H), 4.25 (q,  $J = 7.3$  Hz, 2H), 2.73 (s, 3H), 1.43 (t,  $J = 7.3$  Hz, 3H).  $^{13}C$  NMR (151 MHz, DMSO- $d_6$ , ppm)  $\delta$  164.31, 150.03, 144.38, 121.70, 120.98, 43.72, 14.91, 11.14. IR: (cm $^{-1}$ )=3426, 3098, 3071, 2975, 1957, 1591, 1520, 1463, 1438, 1398, 1298, 1263, 1173, 1126, 1060, 981, 818, 702, 682, 597, 537.

**3-(1-ethyl-2-isopropyl-1H-imidazol-3-ium-3-yl)-6-oxo-3,6-dihydro-1,2,4,5-tetrazin-3-ide (3m)**

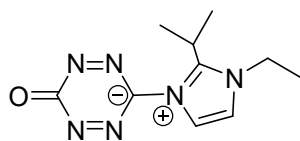

81mg amaranth solid, yield: 58%. Mp: 204.3-206.8°C. HRMS (ESI)  $m/z$  calculated for  $C_{10}H_{15}N_6O$   $[M+H]^+$ , 235.1302; found 235.1297.  $^1H$  NMR (600 MHz, DMSO- $d_6$ , ppm)  $\delta$  8.10 (d,  $J = 2.2$  Hz, 1H), 7.98 (d,  $J = 2.2$  Hz, 1H), 4.34 (q,  $J = 7.3$  Hz, 2H), 3.64 (hept,  $J = 7.1$  Hz, 1H), 1.48 (t,  $J = 7.3$  Hz, 3H), 1.21 (d,  $J = 7.1$  Hz, 6H);  $^{13}C$  NMR (151 MHz, DMSO- $d_6$ , ppm)  $\delta$  163.90, 150.30, 150.22, 123.23, 122.20, 44.04, 25.51, 19.63, 15.60.

**3-(2-methyl-1-propyl-1H-imidazol-3-ium-3-yl)-6-oxo-3,6-dihydro-1,2,4,5-tetrazin-3-ide  
(3n)**

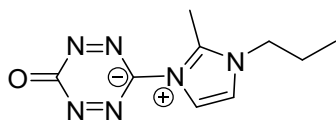

60mg amaranth solid, yield: 45%. Mp: 222.0-223.4°C. HRMS (ESI)  $m/z$  calculated for  $C_9H_{13}N_6O$   $[M+H]^+$ , 221.1145; found 221.1142.  $^1H$  NMR (600 MHz, DMSO- $d_6$ , ppm)  $\delta$  8.13 (t,  $J = 2.1$  Hz, 1H), 7.94 (d,  $J = 2.2$  Hz, 1H), 4.20 (td,  $J = 7.5, 2.6$  Hz, 2H), 2.73 (d,  $J = 2.6$  Hz, 3H), 1.83 (dd,  $J = 7.3, 2.6$  Hz, 2H), 0.94 – 0.91 (m, 3H);  $^{13}C$  NMR (151 MHz, DMSO- $d_6$ , ppm)  $\delta$  164.33, 150.06, 144.55, 122.35, 120.87, 49.77, 22.74, 11.28, 10.97. IR: ( $cm^{-1}$ )=3406, 3129, 3049, 2972, 2879, 1956, 1583, 1522, 1433, 1394, 1306, 1263, 1240, 1175, 1059, 979, 836, 817, 786, 707, 595, 543.

**3-(2-isopropyl-1-propyl-1H-imidazol-3-ium-3-yl)-6-oxo-3,6-dihydro-1,2,4,5-tetrazin-3-ide  
(3o)**

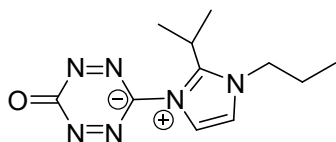

74mg amaranth solid, yield: 50%. Mp: 238.6-240.7°C. HRMS (ESI)  $m/z$  calculated for  $C_{11}H_{17}N_6O$   $[M+H]^+$ , 249.1458; found 249.1454.  $^1H$  NMR (600 MHz, DMSO- $d_6$ , ppm)  $\delta$  8.11 (d,  $J = 2.1$  Hz, 1H), 7.98 (d,  $J = 2.2$  Hz, 1H), 4.27-4.24 (m, 2H), 3.69- 3.64 (m, 1H), 1.91-1.84 (m, 2H), 1.19 (d,  $J = 7.1$  Hz, 6H), 0.96 (t,  $J = 7.4$  Hz, 3H);  $^{13}C$  NMR (151 MHz, DMSO- $d_6$ , ppm)  $\delta$  163.87, 150.55, 150.23, 123.31, 122.62, 49.98, 25.44, 23.36, 19.75, 10.97. IR: ( $cm^{-1}$ )=3425, 3100, 2975, 2878, 1964, 1712, 1638, 1595, 1509, 1449, 1402, 1365, 1259, 1236, 1191, 1176, 1044, 979, 801, 732, 578, 556.

**3-(1-butyl-2-methyl-1H-imidazol-3-ium-3-yl)-6-oxo-3,6-dihydro-1,2,4,5-tetrazin-3-ide  
(3p)**

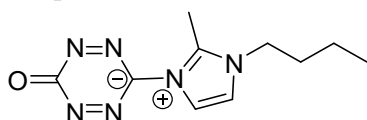

88mg amaranth solid, yield: 63%. Mp: 202.0-204.7°C. HRMS (ESI)  $m/z$  calculated for  $C_{10}H_{15}N_6O$   $[M+H]^+$ , 235.1302; found 235.1297.  $^1H$  NMR (600 MHz, DMSO- $d_6$ , ppm)  $\delta$  8.12 (dd,  $J = 2.3, 0.9$  Hz, 1H), 7.92 (dd,  $J = 2.3, 0.9$  Hz, 1H), 4.22 (t,  $J = 7.4$  Hz, 2H), 2.73 (d,  $J = 0.9$  Hz, 3H), 1.82-1.76 (m, 2H), 1.35 (h,  $J = 7.4$  Hz, 2H), 0.93 (td,  $J = 7.3, 1.0$  Hz, 3H);  $^{13}C$  NMR (151 MHz, DMSO- $d_6$ , ppm)  $\delta$  164.29, 150.04, 144.51, 122.29, 120.89, 48.21, 31.27, 19.45, 13.85, 11.27.

**3-(1-butyl-2-isopropyl-1H-imidazol-3-ium-3-yl)-6-oxo-3,6-dihydro-1,2,4,5-tetrazin-3-ide  
(3q)**

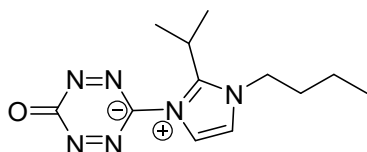

83mg amaranth solid, yield: 53%. Mp: 236.6-239.0°C. HRMS (ESI)  $m/z$  calculated for  $C_{12}H_{19}N_6O$

[M+H]<sup>+</sup>, 263.1615; found 263.1610. <sup>1</sup>H NMR (600 MHz, DMSO-*d*<sub>6</sub>, ppm) δ 8.13-8.09 (m, 1H), 7.99 (s, 1H), 4.28 (t, *J* = 7.5 Hz, 2H), 3.66 (p, *J* = 7.1 Hz, 1H), 1.83 (t, *J* = 7.7 Hz, 2H), 1.38 (q, *J* = 7.6 Hz, 2H), 1.18 (d, *J* = 7.1 Hz, 6H), 0.94 (t, *J* = 7.3 Hz, 3H). <sup>13</sup>C NMR (151 MHz, DMSO-*d*<sub>6</sub>, ppm) δ 163.87, 150.49, 150.23, 123.31, 122.62, 48.49, 31.95, 25.46, 19.75, 19.52, 13.91.

**3-(1-isopropyl-2-methyl-1*H*-imidazol-3-ium-3-yl)-6-oxo-3,6-dihydro-1,2,4,5-tetrazin-3-ide (3r)**

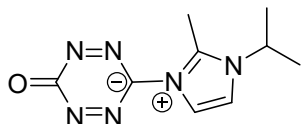

63mg amaranth solid, yield:48%. Mp: 232.5-235.1°C. HRMS (ESI) *m/z* calculated for C<sub>9</sub>H<sub>12</sub>N<sub>6</sub>O [M+H]<sup>+</sup> *m/z*: 221.1145, found 221.1143. <sup>1</sup>H NMR (600 MHz, DMSO-*d*<sub>6</sub>, ppm) δ 8.16 (s, 1H), 8.08 (s, 1H), 4.77 (p, *J* = 6.8 Hz, 1H), 2.74 (s, 3H), 1.50 (d, *J* = 6.7 Hz, 6H). <sup>13</sup>C NMR (151 MHz, DMSO-*d*<sub>6</sub>, ppm) δ 164.28, 149.99, 143.88, 121.60, 118.79, 51.04, 22.21, 11.19.

**3-(1-hexyl-2-methyl-1*H*-imidazol-3-ium-3-yl)-6-oxo-3,6-dihydro-1,2,4,5-tetrazin-3-ide (3s)**

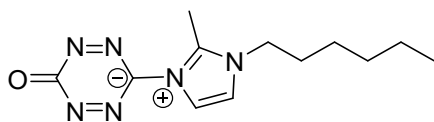

82mg amaranth solid, yield: 52%. Mp: 208.4-210.9°C. HRMS (ESI) *m/z* calculated for C<sub>12</sub>H<sub>19</sub>N<sub>6</sub>O [M+H]<sup>+</sup>, 263.1615; found 263.1611. <sup>1</sup>H NMR (600 MHz, DMSO-*d*<sub>6</sub>, ppm) δ 8.12 (d, *J* = 2.2 Hz, 1H), 7.96 (d, *J* = 2.2 Hz, 1H), 4.23 (t, *J* = 7.5 Hz, 2H), 2.73 (s, 3H), 1.80 (p, *J* = 7.4 Hz, 2H), 1.33-1.27 (m, 6H), 0.88-0.84 (m, 3H); <sup>13</sup>C NMR (151 MHz, DMSO-*d*<sub>6</sub>, ppm) δ 164.38, 150.08, 144.49, 122.35, 120.85, 48.42, 31.11, 29.25, 25.76, 22.36, 14.28, 11.29. IR: (cm<sup>-1</sup>) = 3426, 3113, 2932, 2860, 1958, 1714, 1589, 1520, 1471, 1399, 1263, 1230, 1058, 984, 837, 817, 583.

**3-(1-isobutyl-2-methyl-1*H*-imidazol-3-ium-3-yl)-6-oxo-3,6-dihydro-1,2,4,5-tetrazin-3-ide (3t)**

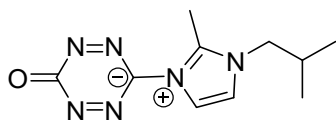

93mg amaranth solid, yield: 66%. Mp: 224.5-227.6°C. HRMS (ESI) *m/z* calculated for C<sub>10</sub>H<sub>15</sub>N<sub>6</sub>O [M+H]<sup>+</sup>, 235.1302; found 235.1301. <sup>1</sup>H NMR (600 MHz, DMSO-*d*<sub>6</sub>, ppm) δ 8.15 (d, *J* = 2.2 Hz, 1H), 7.90 (d, *J* = 2.3 Hz, 1H), 4.08 (d, *J* = 7.5 Hz, 2H), 2.74 (s, 3H), 2.15 (dt, *J* = 13.8, 6.9 Hz, 1H), 0.93 (d, *J* = 6.6 Hz, 6H); <sup>13</sup>C NMR (151 MHz, DMSO-*d*<sub>6</sub>, ppm) δ 164.30, 150.07, 144.71, 122.80, 120.82, 54.91, 28.82, 19.62, 11.49.

**3-(2-methyl-1-(3-phenylpropyl)-1*H*-imidazol-3-ium-3-yl)-6-oxo-3,6-dihydro-1,2,4,5-tetrazin-3-ide (3u)**

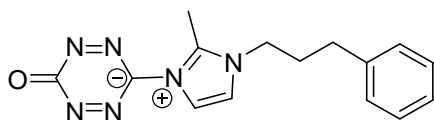

110mg amaranth solid, yield: 62%. Mp: 204.1-206.3°C. HRMS (ESI)  $m/z$  calculated for  $C_{15}H_{15}N_6O$   $[M-H]^-$ , 295.1313; found 295.1312.  $^1H$  NMR (600 MHz, DMSO- $d_6$ , ppm)  $\delta$  8.11 (d,  $J = 2.0$  Hz, 1H), 7.99 (d,  $J = 2.2$  Hz, 1H), 7.29 (t,  $J = 7.5$  Hz, 2H), 7.26 – 7.23 (m, 2H), 7.21 – 7.17 (m, 1H), 4.28 (t,  $J = 7.4$  Hz, 2H), 2.71 (s, 3H), 2.68 (dd,  $J = 9.3, 6.6$  Hz, 2H), 2.18 – 2.12 (m, 2H);  $^{13}C$  NMR (151 MHz, DMSO- $d_6$ , ppm)  $\delta$  164.39, 150.11, 144.59, 141.01, 128.84, 128.82, 128.66, 128.64, 126.51, 122.31, 120.86, 48.17, 32.15, 30.69, 11.37.

**3-(2-isopropyl-1-(3-phenylpropyl)-1H-imidazol-3-ium-3-yl)-6-oxo-3,6-dihydro-1,2,4,5-tetrazin-3-ide (3v)**

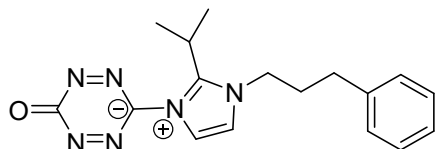

91mg amaranth solid, yield: 47%. Mp: 232.1-234.2°C. HRMS (ESI)  $m/z$  calculated for  $C_{17}H_{21}N_6O$   $[M-H]^-$ , 323.1626; found 323.1627.  $^1H$  NMR (600 MHz, DMSO- $d_6$ , ppm)  $\delta$  8.11-8.10 (m, 1H), 8.05 (t,  $J = 1.7$  Hz, 1H), 7.30 (d,  $J = 7.4$  Hz, 2H), 7.27 (d,  $J = 7.4$  Hz, 2H), 7.23 – 7.19 (m, 1H), 4.32 (t,  $J = 7.7$  Hz, 2H), 3.61 (p,  $J = 7.1$  Hz, 1H), 2.74 – 2.70 (m, 2H), 2.19 (td,  $J = 7.4, 3.7$  Hz, 2H), 1.15 (d,  $J = 7.1$  Hz, 6H);  $^{13}C$  NMR (151 MHz, DMSO- $d_6$ , ppm)  $\delta$  163.92, 150.47, 150.25, 140.96, 128.86, 128.72, 126.57, 123.26, 122.64, 48.28, 32.15, 31.43, 25.46, 19.66.

**3-(1-benzyl-2-methyl-1H-imidazol-3-ium-3-yl)-6-oxo-3,6-dihydro-1,2,4,5-tetrazin-3-ide (3w)**

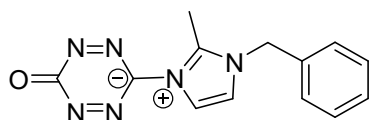

96mg red solid, yield: 63%. Mp: 254.7-257.4°C. HRMS (ESI)  $m/z$  calculated for  $C_{13}H_{13}N_6O$   $[M+H]^+$ , 269.1145; found 269.1150.  $^1H$  NMR (600 MHz, DMSO- $d_6$ , ppm)  $\delta$  8.16 (d,  $J = 2.2$  Hz, 1H), 7.99 (dd,  $J = 4.7, 2.4$  Hz, 1H), 7.46-7.34 (m, 5H), 5.56 (t,  $J = 2.7$  Hz, 2H), 2.75 (s, 3H).  $^{13}C$  NMR (151 MHz, DMSO- $d_6$ , ppm)  $\delta$  164.36, 150.08, 144.82, 134.57, 129.50, 129.07, 128.43, 122.70, 121.11, 51.49, 11.68. IR:  $(cm^{-1})=3424, 3100, 3058, 1958, 1587, 1519, 1457, 1412, 1355, 1311, 1287, 1265, 1222, 1199, 1139, 1060, 1025, 982, 839, 816, 732, 644, 588$ .

**3-(1-cyclopentyl-1H-imidazol-3-ium-3-yl)-6-oxo-3,6-dihydro-1,2,4,5-tetrazin-3-ide (3x)**

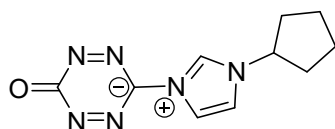

91.42mg purple solid, yield: 66%. Mp: 197.9-199.9°C. HRMS (ESI)  $m/z$  calculated for  $C_{10}H_{12}N_6O$   $[M+H]^+$   $m/z$ : 233.1145, found 233.1151.  $^1H$  NMR (600 MHz, DMSO- $d_6$ ):  $\delta$  9.95 (t,  $J = 1.7$  Hz, 1H), 8.35 (t,  $J = 1.9$  Hz, 1H), 8.10 (t,  $J = 1.9$  Hz, 1H), 4.89 (p,  $J = 7.4$  Hz, 1H), 2.28-2.21 (m, 2H), 2.01-1.95 (m, 2H), 1.85 (tdd,  $J = 11.6, 8.5, 5.0$  Hz, 2H), 1.72-1.64 (m, 2H).  $^{13}C$  NMR (151 MHz, DMSO- $d_6$ ):  $\delta$  165.15, 148.58, 132.59, 121.87, 119.00, 61.15, 32.55, 23.28.

**3-(1-cyclohexyl-1H-imidazol-3-ium-3-yl)-6-oxo-3,6-dihydro-1,2,4,5-tetrazin-3-ide (3y)**

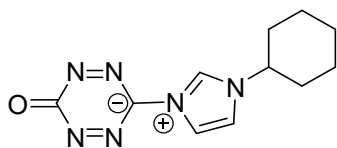

92mg purple solid, yield: 62%. Mp:139.5-140.1°C. HRMS (ESI) m/z calculated for C<sub>11</sub>H<sub>14</sub>N<sub>6</sub>O [M+H]<sup>+</sup> m/z: 247.1302, found 247.1308. <sup>1</sup>H NMR(600MHz, DMSO-*d*<sub>6</sub>): δ9.93(t, *J*=1.7Hz, 1H), 8.34(t, *J*=1.9Hz, 1H), 8.11(t, *J*=1.9Hz, 1H), 4.43(tt, *J*=11.9, 3.9Hz, 1H), 2.15-2.08(m, 2H), 1.90-1.77(m, 4H), 1.72-1.64(m, 1H), 1.44-1.34(m, 2H), 1.23(qt, *J*=13.0, 3.6Hz, 1H). <sup>13</sup>C NMR(151MHz, DMSO-*d*<sub>6</sub>): δ165.12, 148.56, 132.14, 121.56, 118.71, 59.40, 32.25, 24.64, 24.29.

**3-(1-cyclopentyl-1H-benzo[d]imidazol-3-ium-3-yl)-6-oxo-3,6-dihydro-1,2,4,5-tetrazin-3-ide (3z)**

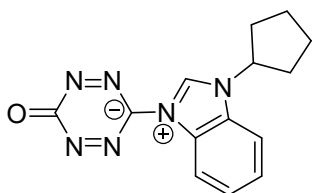

123mg purple solid, yield:73%. Mp:249.7-250.1°C. HRMS (ESI) m/z calculated for C<sub>14</sub>H<sub>14</sub>N<sub>6</sub>O [M+H]<sup>+</sup>m/z: 283.1302, found 283.1309. <sup>1</sup>HNMR(600MHz, DMSO-*d*<sub>6</sub>): δ10.35(s, 1H), 8.36-8.32(m, 1H), 8.19(ddd, *J*=6.3, 4.3, 2.6Hz, 1H), 7.79-7.74(m, 2H), 5.27(p, *J*=7.4Hz, 1H), 2.41-2.34(m, 2H), 2.23-2.16(m, 2H), 1.94(tdd, *J*=11.5, 8.3, 5.8Hz, 2H), 1.80-1.71(m, 2H). <sup>13</sup>CNMR(151MHz, DMSO-*d*<sub>6</sub>):δ164.51, 149.58, 138.55, 131.34, 129.35, 127.66, 126.91, 116.02, 114.27, 59.37, 31.46, 23.53.

**3-(1-cyclohexyl-1H-benzo[d]imidazol-3-ium-3-yl)-6-oxo-3,6-dihydro-1,2,4,5-tetrazin-3-ide (3aa)**

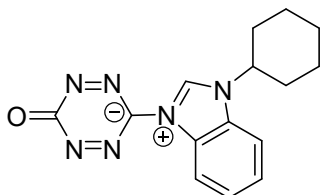

56.8mg purple solid, yield:43%. Mp:191.3-191.6°C. HRMS (ESI) m/z calculated for C<sub>15</sub>H<sub>16</sub>N<sub>6</sub>O [M+H]<sup>+</sup> m/z: 297.1458, found 297.1455. <sup>1</sup>H NMR (600MHz, DMSO-*d*<sub>6</sub>): δ10.41(s, 1H), 8.38-8.34(m, 1H), 8.32-8.28(m, 1H), 7.78-7.73(m, 2H), 4.87(tt, *J*=12.1, 3.8Hz, 1H), 2.26-2.19(m, 2H), 2.05(qd, *J*=12.4, 3.6Hz, 2H), 1.91(dt, *J*=13.9, 3.4Hz, 2H), 1.74(dt, *J*=13.0, 3.5Hz, 1H), 1.55(qt, *J*=13.2, 3.5Hz, 2H), 1.37-1.27(m, 1H). <sup>13</sup>C NMR (151MHz, DMSO-*d*<sub>6</sub>):δ164.55, 149.67, 138.56, 130.88, 129.03, 127.66, 126.85, 116.10, 114.20, 57.58, 31.67, 24.83, 24.47.



**3-(1-(naphthalen-2-yl)-1H-imidazol-3-ium-3-yl)-6-oxo-3,6-dihydro-1,2,4,5-tetrazin-3-ide (3ab)**

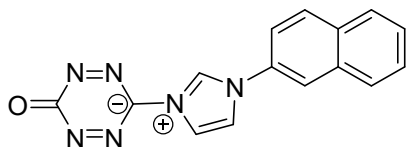

120.7mg purple solid, yield:69%. Mp:261.9-262.2°C. HRMS (ESI) m/z calculated for C<sub>15</sub>H<sub>10</sub>N<sub>6</sub>O [M+H]<sup>+</sup> m/z: 291.0989, found 291.0992. <sup>1</sup>H NMR(600MHz, DMSO-*d*<sub>6</sub>):δ10.62(t, *J*=1.7Hz, 1H), 8.67(t, *J*=2.0Hz, 1H), 8.64(t, *J*=1.9Hz, 1H), 8.58(d, *J*=2.3Hz, 1H), 8.24(d, *J*=8.9Hz, 1H), 8.11-8.04(m, 3H), 7.72-7.67(m, 2H). <sup>13</sup>C NMR(151MHz, DMSO-*d*<sub>6</sub>):δ165.17, 148.61, 132.81, 132.56, 132.16, 132.03, 130.14, 128.33, 127.96, 127.83, 127.75, 122.28, 120.84, 119.90, 119.55.

**3-(1-(naphthalen-1-yl)-1H-imidazol-3-ium-3-yl)-6-oxo-3,6-dihydro-1,2,4,5-tetrazin-3-ide (3ac)**

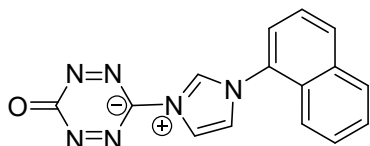

129mg purple solid, yield:74%. Mp:294.5-294.7°C. HRMS (ESI) m/z calculated for C<sub>15</sub>H<sub>10</sub>N<sub>6</sub>O [M+H]<sup>+</sup> m/z: 291.0989, found 291.0989. <sup>1</sup>H NMR(600MHz, DMSO-*d*<sub>6</sub>):δ10.42(t, *J*=1.6Hz, 1H), 8.67(t, *J*=1.8Hz, 1H), 8.40(t, *J*=1.9Hz, 1H), 8.28(d, *J*=8.3Hz, 1H), 8.19(dd, *J*=7.7, 1.5Hz, 1H), 7.96(dd, *J*=7.3, 1.1Hz, 1H), 7.79-7.68(m, 4H). <sup>13</sup>C NMR(151MHz, DMSO-*d*<sub>6</sub>):δ165.05, 148.62, 134.80, 133.58, 131.20, 131.15, 128.44, 128.39, 127.85, 127.49, 125.58, 125.44, 125.18, 121.68, 118.98.

**3-(1-(4-(1H-imidazol-1-yl)naphthalen-1-yl)-1H-imidazol-3-ium-3-yl)-6-oxo-3,6-dihydro-1,2,4,5-tetrazin-3-ide (3ad)**

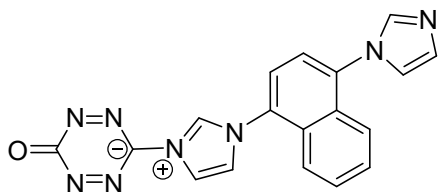

90mg purple solid, yield:51%. Mp:207.1-207.9°C. HRMS (ESI) m/z calculated for C<sub>18</sub>H<sub>12</sub>N<sub>8</sub>O [M+H]<sup>+</sup> m/z: 357.1207, found 357.1200. <sup>1</sup>H NMR(600MHz, DMSO-*d*<sub>6</sub>): δ10.49(t, *J*=1.6Hz, 1H), 8.72(t, *J*=1.9Hz, 1H), 8.43(t, *J*=1.9Hz, 1H), 8.13-8.09(m, 2H), 7.91-7.88(m, 2H), 7.84-7.80(m, 2H), 7.73-7.70(m, 1H), 7.67(t, *J*=1.3Hz, 1H), 7.29(t, *J*=1.1Hz, 1H). <sup>13</sup>C NMR(151MHz, DMSO-*d*<sub>6</sub>):δ165.12, 148.63, 138.56, 136.17, 135.02, 131.62, 129.45, 129.25, 129.19, 129.19, 128.81, 125.66, 125.27, 123.44, 122.82, 122.64, 122.12, 119.11.

**3-(1-(anthracen-2-yl)-1H-imidazol-3-ium-3-yl)-6-oxo-3,6-dihydro-1,2,4,5-tetrazin-3-ide (3ae)**

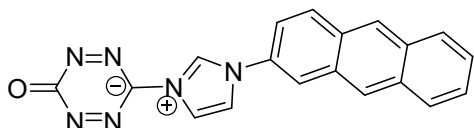

65mg purple solid, yield:47.74%. Mp:202.9-203.2°C. HRMS (ESI) m/z calculated for C<sub>19</sub>H<sub>12</sub>N<sub>6</sub>O [M+H]<sup>+</sup> m/z: 341.1145, found 341.1148. <sup>1</sup>H NMR(600MHz, DMSO-*d*<sub>6</sub>): δ10.67(t, *J*=1.7Hz, 1H), 8.78–8.71(m, 4H), 8.66(t, *J*=1.9Hz, 1H), 8.41(d, *J*=9.1Hz, 1H), 8.19(ddd, *J*=24.4, 6.1, 3.2Hz, 2H), 8.05(dd, *J*=9.1, 2.3Hz, 1H), 7.62(dt, *J*=6.6, 3.3Hz, 2H). <sup>13</sup>C NMR(151MHz, DMSO-*d*<sub>6</sub>): δ165.02, 148.54, 132.17, 132.04, 132.02, 131.57, 130.75, 130.24, 129.97, 128.24, 128.15, 127.23, 126.77, 126.61, 126.60, 122.19, 120.92, 119.70, 119.56.

**3-(1-(anthracen-9-yl)-1*H*-imidazol-3-ium-3-yl)-6-oxo-3,6-dihydro-1,2,4,5-tetrazin-3-ide (3af)**

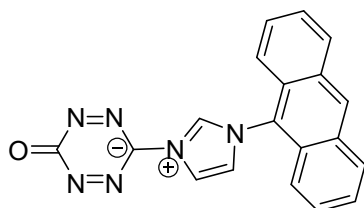

78.3mg purple solid, yield:54%. Mp:294.5-294.7°C. HRMS (ESI) m/z calculated for C<sub>19</sub>H<sub>12</sub>N<sub>6</sub>O [M-H]<sup>-</sup> m/z: 339.1000, found 339.1004. <sup>1</sup>H NMR(600MHz, DMSO-*d*<sub>6</sub>): δ10.56(t, *J*=1.6Hz, 1H), 9.07(s, 1H), 8.85(t, *J*=1.9Hz, 1H), 8.43(t, *J*=1.9Hz, 1H), 8.34(dt, *J*=6.6, 2.7Hz, 2H), 7.71(td, *J*=7.2, 6.4, 3.9Hz, 6H). <sup>13</sup>C NMR(151MHz, DMSO-*d*<sub>6</sub>): δ165.22, 148.81, 135.81, 130.64, 130.61, 128.84, 128.62, 127.43, 126.44, 126.40, 125.74, 121.61, 119.66.

**6-oxo-3-(1-(4-(trifluoromethyl)phenyl)-1*H*-imidazol-3-ium-3-yl)-3,6-dihydro-1,2,4,5-tetrazin-3-ide (3ag)**

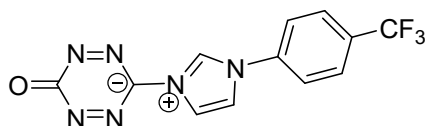

32mg purple solid, yield:42%. Mp:248.7-249.1°C. HRMS (ESI) m/z calculated for C<sub>12</sub>H<sub>7</sub>F<sub>3</sub>N<sub>6</sub>O [M+H]<sup>+</sup> m/z: 309.0706, found 309.0705. <sup>1</sup>H NMR(600MHz, DMSO-*d*<sub>6</sub>): δ10.64(d, *J*=1.7Hz, 1H), 8.66–8.59(m, 2H), 8.20(d, *J*=8.3Hz, 2H), 8.09(d, *J*=8.4Hz, 2H). <sup>13</sup>C NMR(151MHz, DMSO-*d*<sub>6</sub>): δ165.02, 148.48, 137.74, 137.73, 132.68, 127.31, 127.29, 127.27, 127.24, 123.36, 122.18, 119.62.

**3-(1-cyclopentyl-2,4-dimethyl-1*H*-imidazol-3-ium-3-yl)-6-oxo-3,6-dihydro-1,2,4,5-tetrazin-3-ide (3ah)**

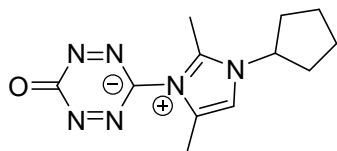

184.6mg, purple solid, yield:70.9%. Mp:261.1-261.7°C HRMS (ESI) m/z calculated for C<sub>12</sub>H<sub>16</sub>N<sub>6</sub>O [M+H]<sup>+</sup> m/z: 261.1459, found 261.1458. <sup>1</sup>H NMR (400 MHz, DMSO-*d*<sub>6</sub>): δ 7.83 (s, 1H), 4.88 – 4.83 (m, 1H), 2.18 (s, 3H), 1.92 – 1.81 (m, 5H), 1.69 (s, 3H). <sup>13</sup>C NMR (176 MHz, DMSO-*d*<sub>6</sub>): δ 165.09, 150.26, 140.83, 132.63, 129.19, 128.08, 127.36, 116.56, 114.29, 34.08.

**3-(1-cyclopentyl-5-(methoxycarbonyl)-1H-imidazol-3-ium-3-yl)-6-oxo-3,6-dihydro-1,2,4,5-tetrazin-3-ide (3ai)**

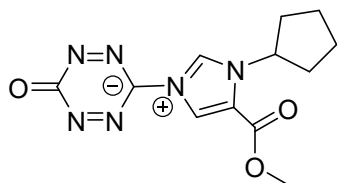

200.6mg, purple solid, yield: 69.2%. Mp:242.2-243.1 °C. HRMS (ESI) m/z calculated for C<sub>12</sub>H<sub>14</sub>N<sub>6</sub>O<sub>3</sub> [M+H]<sup>+</sup> m/z: 290.1201, found 291.1198. <sup>1</sup>H NMR (400 MHz, DMSO-*d*<sub>6</sub>):δ 10.12 (d, *J* = 2.3 Hz, 1H), 8.89 (d, *J* = 1.6 Hz, 1H), 5.41 (p, *J* = 7.3 Hz, 1H), 3.93 (s, 3H), 2.28 – 2.21 (m, 2H), 2.12 – 2.05 (m, 2H), 1.90 – 1.83 (m, 2H), 1.71 – 1.64 (m, 2H). <sup>13</sup>C NMR (176 MHz, DMSO-*d*<sub>6</sub>):δ 165.31, 158.24, 148.91, 135.76, 125.29, 124.82, 61.63, 53.55, 33.29, 23.80.

**3-(imidazo[1,2- $\alpha$ ]pyridin-1-ium-1-yl)-6-oxo-3,6-dihydro-1,2,4,5-tetrazin-3-ide (3aj)**

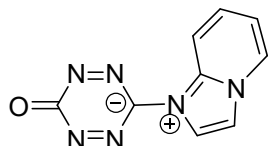

79.1mg, purple solid, yield:61.7%. Mp:284.1-284.4 °C. HRMS (ESI) m/z calculated for C<sub>9</sub>H<sub>6</sub>N<sub>6</sub>O [M+H]<sup>+</sup> m/z: 215.0676, found 215.0675. <sup>1</sup>H NMR (400 MHz, DMSO-*d*<sub>6</sub>):δ 9.03 (d, *J* = 6.7 Hz, 1H), 8.77 (s, 1H), 8.61 – 8.50 (m, 2H), 8.19 – 8.12 (m, 1H), 7.68 (t, *J* = 6.9 Hz, 1H). <sup>13</sup>C NMR (151 MHz, DMSO-*d*<sub>6</sub>):δ 165.04, 150.38, 137.47, 136.16, 130.92, 122.69, 118.81, 116.91, 114.25.

**3-(5-acetyl-4-methyl-1H-imidazol-3-ium-3-yl)-6-oxo-3,6-dihydro-1,2,4,5-tetrazin-3-ide (3ak)**

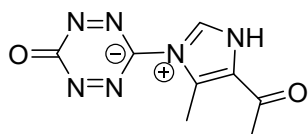

93.1mg, purple solid, yield:44.9%. Mp:236.1-237.2 °C. HRMS (ESI) m/z calculated for C<sub>7</sub>H<sub>6</sub>N<sub>6</sub>O<sub>2</sub> [M+H]<sup>+</sup> m/z: 207.0630, found 207.0628. <sup>1</sup>H NMR (400 MHz, DMSO-*d*<sub>6</sub>):δ 9.89 (s, 1H), 8.16 (s, 1H), 2.54 (s, 3H). <sup>13</sup>C NMR (151 MHz, DMSO-*d*<sub>6</sub>):δ 186.89, 164.90, 150.19, 137.97, 137.69, 136.70, 10.27.

# Figure and scheme

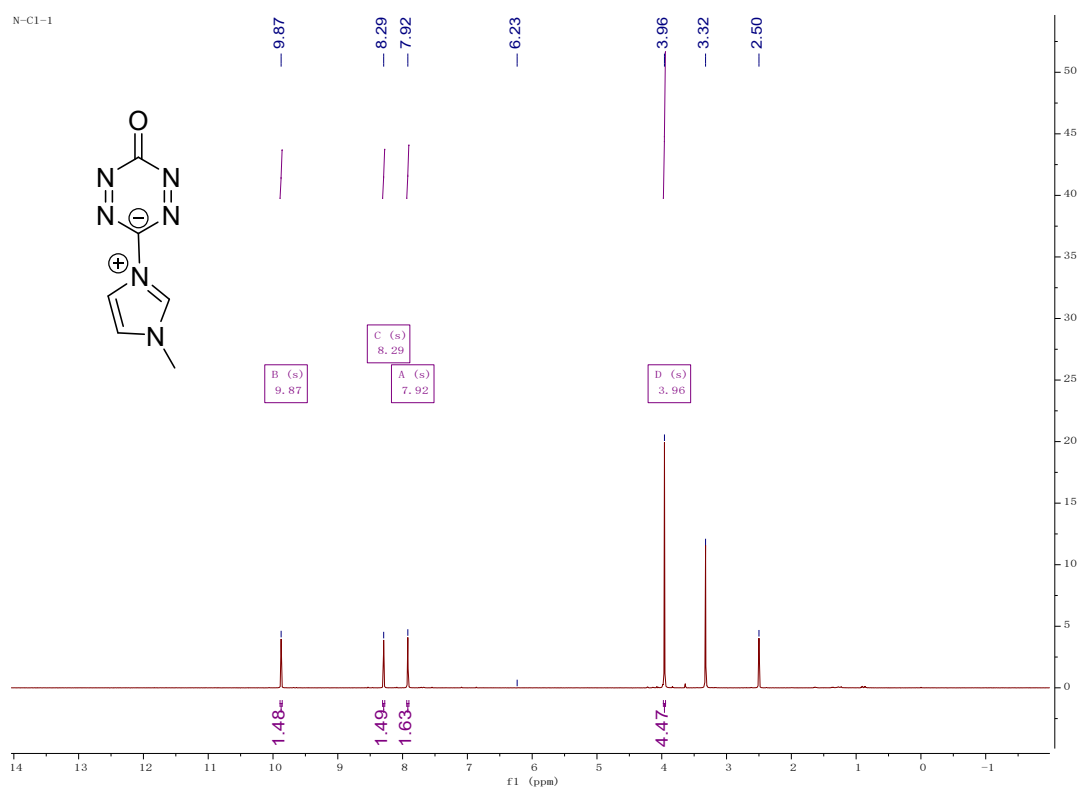

Figure S1.  $^1\text{H-NMR}$  spectra of 3a in  $\text{DMSO-}d_6$

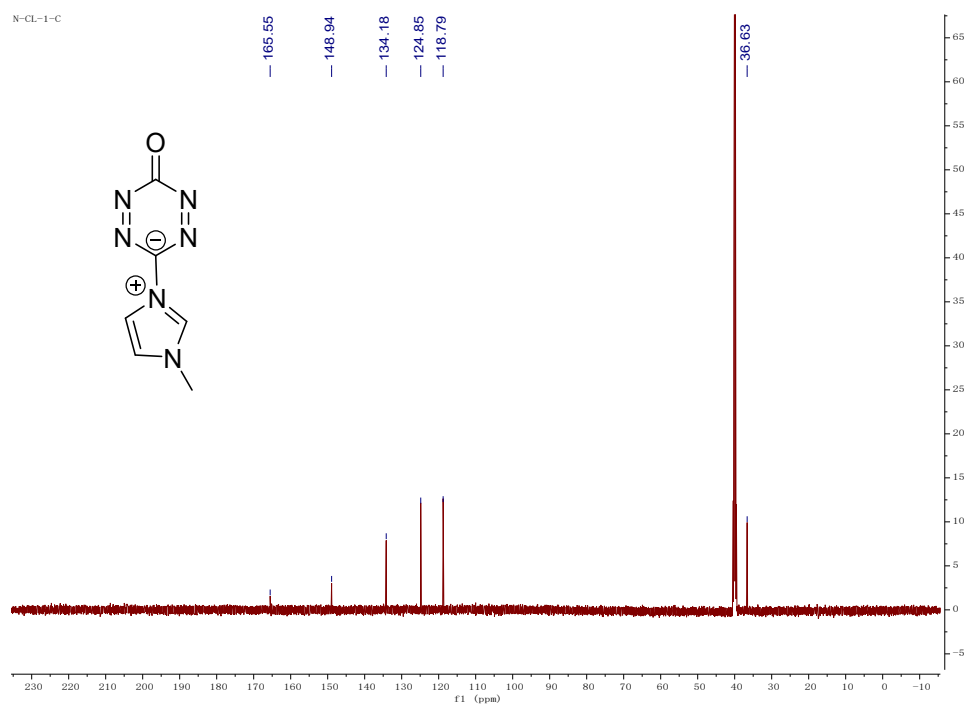

Figure S2.  $^{13}\text{C}$ -NMR spectra of 3a in  $\text{DMSO-}d_6$

5.151 #55 RT: 0.54 AV: 1 NL: 1.75E7  
 T: FTMS + p ESI Full ms [150.0000-2000.0000]

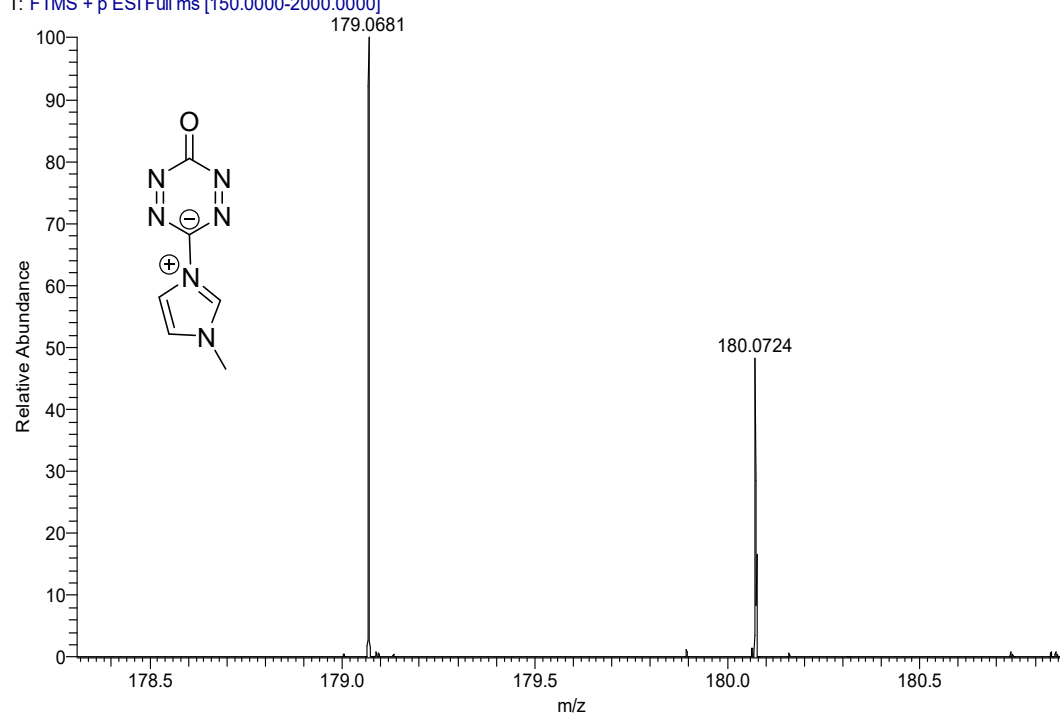

Figure S3. HRMS spectra of 3a in  $\text{DMSO-}d_6$

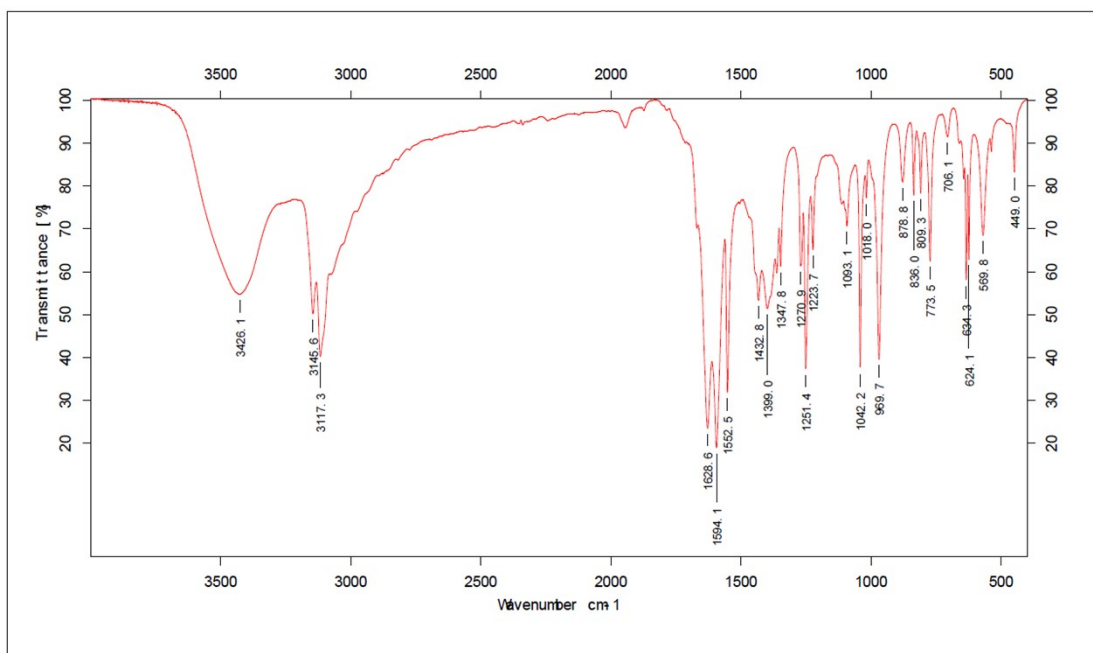

Figure S4. IR spectra of 3a

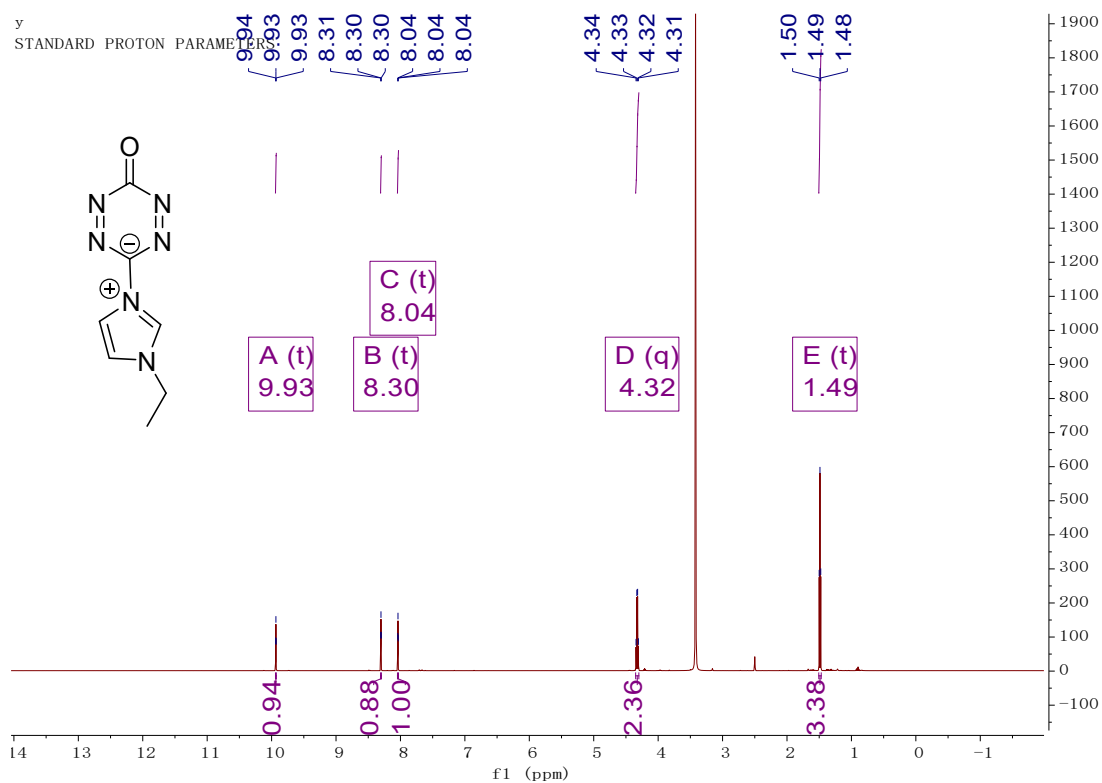

Figure S5. <sup>1</sup>H-NMR spectra of 3b in DMSO-*d*<sub>6</sub>

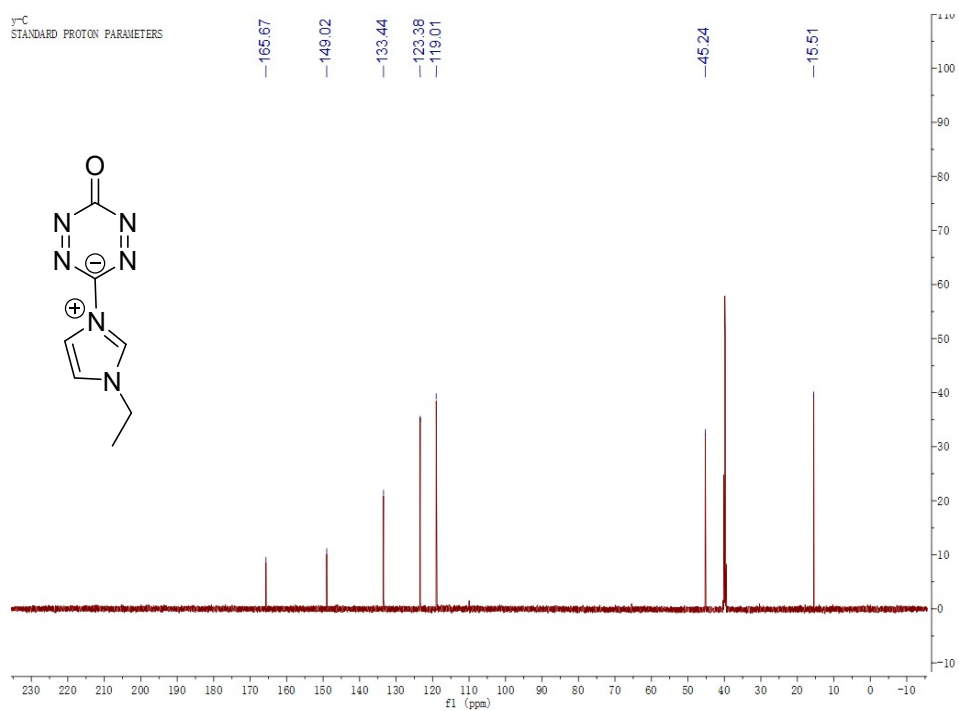

Figure S6. <sup>13</sup>C-NMR spectra of 3b in DMSO-*d*<sub>6</sub>

YI#51 RT: 0.49 AV: 1 NL: 6.61E8  
T: FTMS + p ESI Full ms [150.0000-2000.0000]

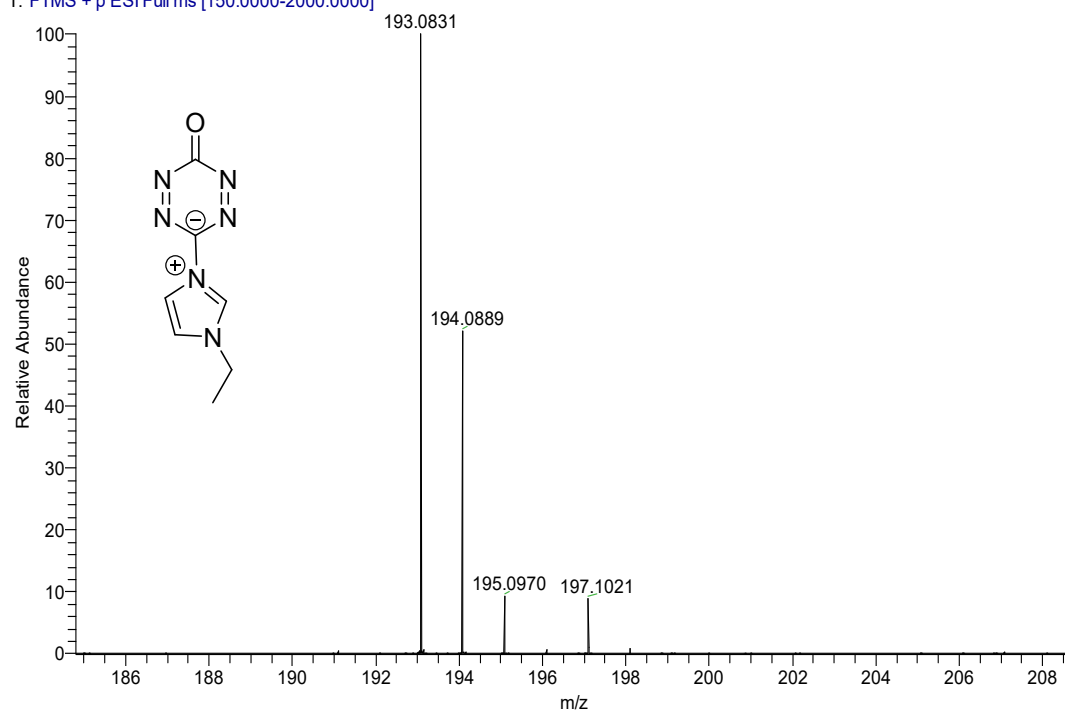

Figure S7. HRMS spectra of 3b in DMSO-*d*<sub>6</sub>

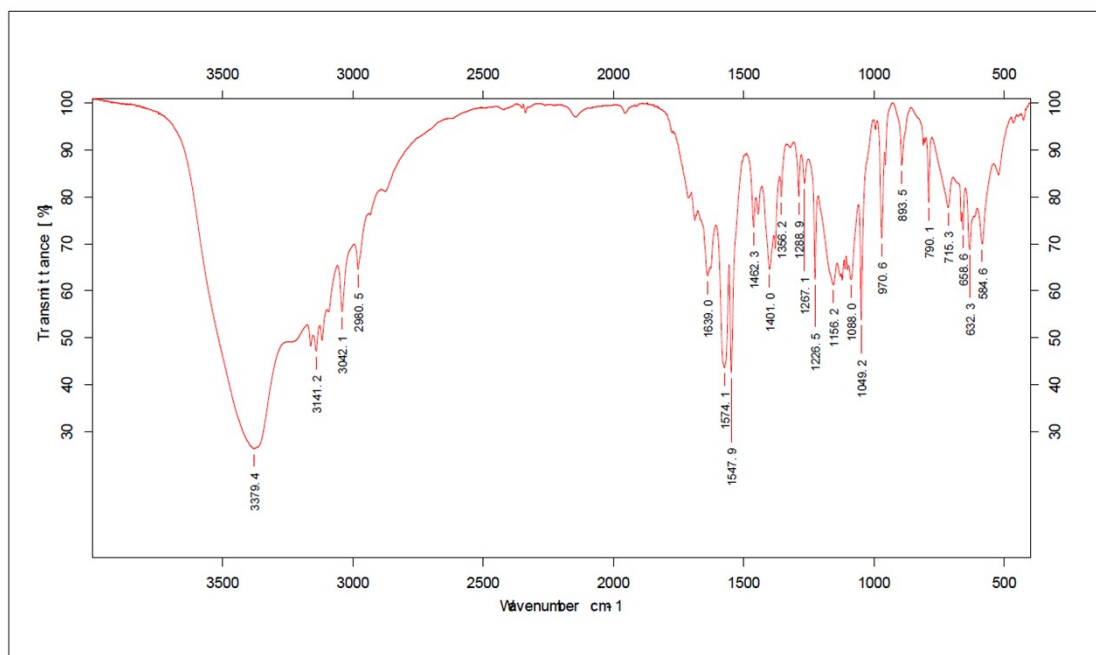

Figure S8. IR spectra of 3b

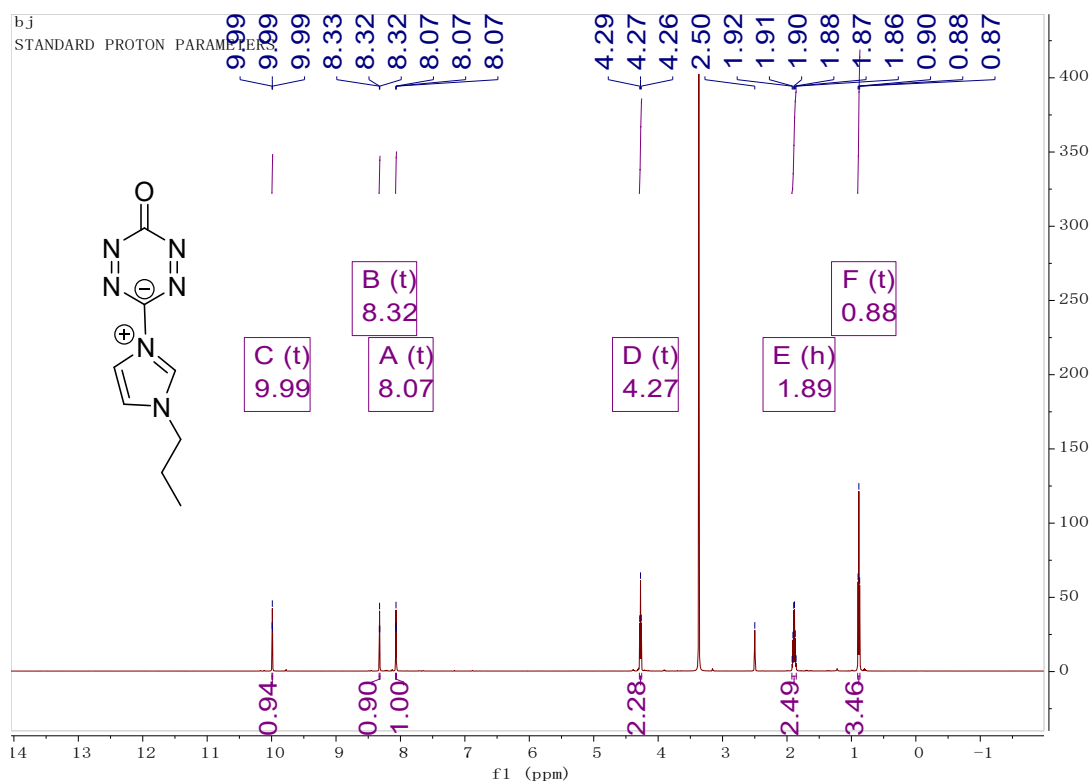

Figure S9. <sup>1</sup>H-NMR spectra of 3c in DMSO-*d*<sub>6</sub>



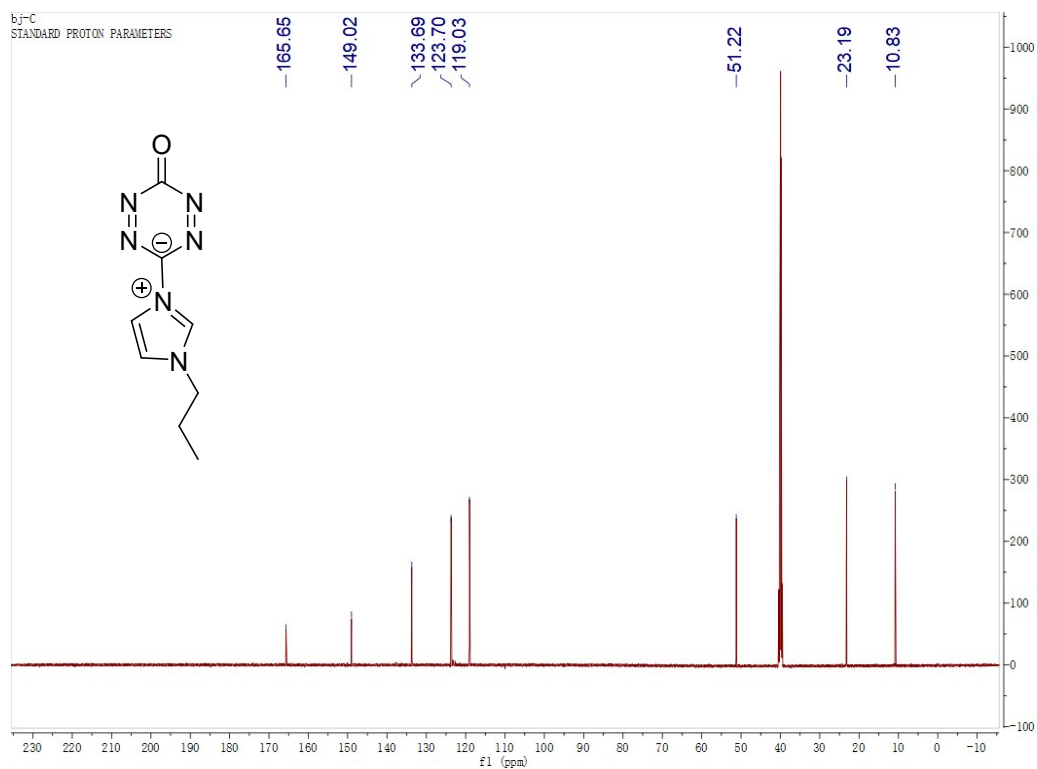

**Figure S10.**  $^{13}\text{C}$ -NMR spectra of 3c in  $\text{DMSO-}d_6$

BJ #87 RT: 0.84 AV: 1 NL: 4.69E8  
T: FTMS + p ESI Full ms [150.0000-2000.0000]

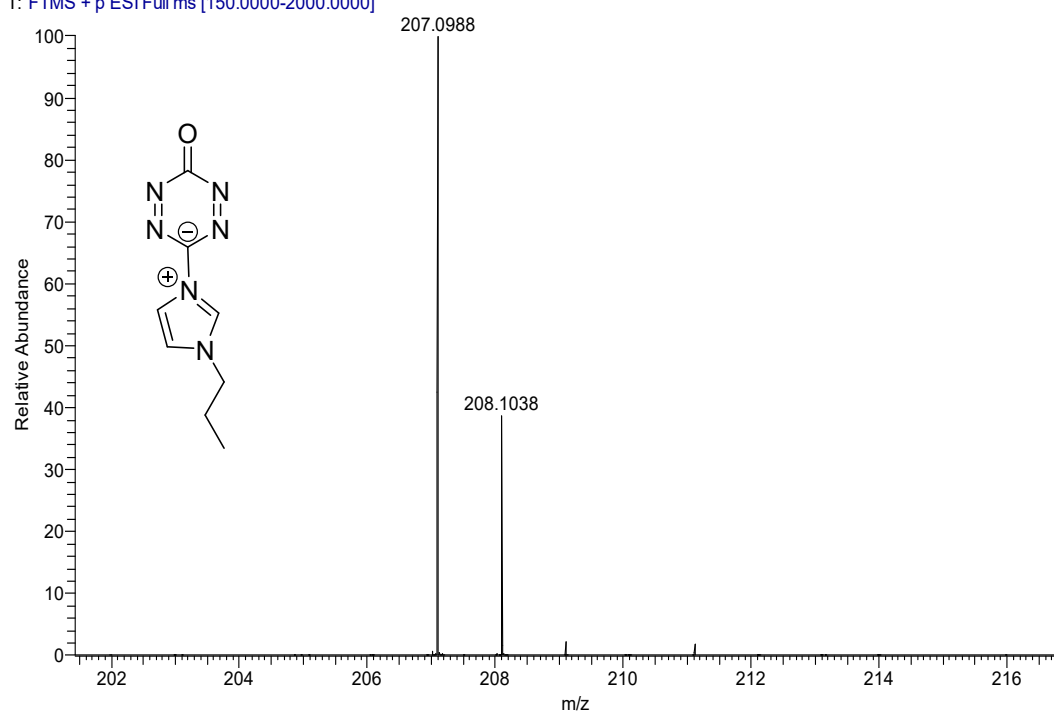

**Figure S11.** HRMS spectra of 3c in  $\text{DMSO-}d_6$

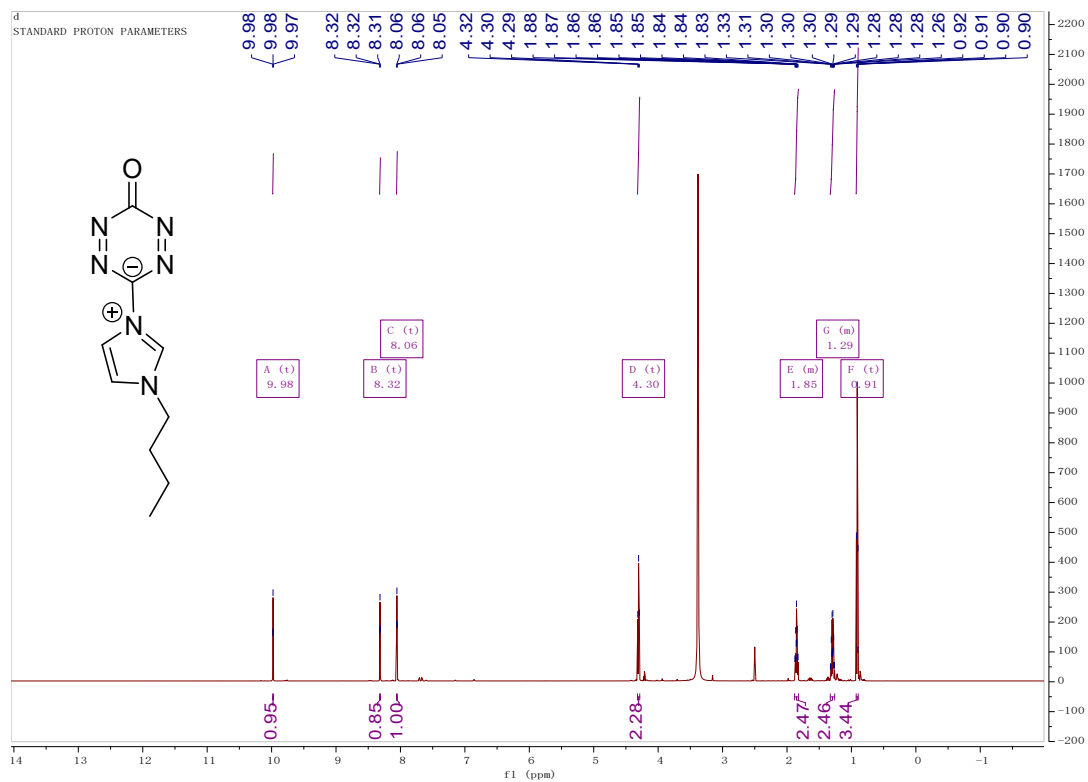

Figure S12.  $^1\text{H-NMR}$  spectra of 3d in  $\text{DMSO-}d_6$

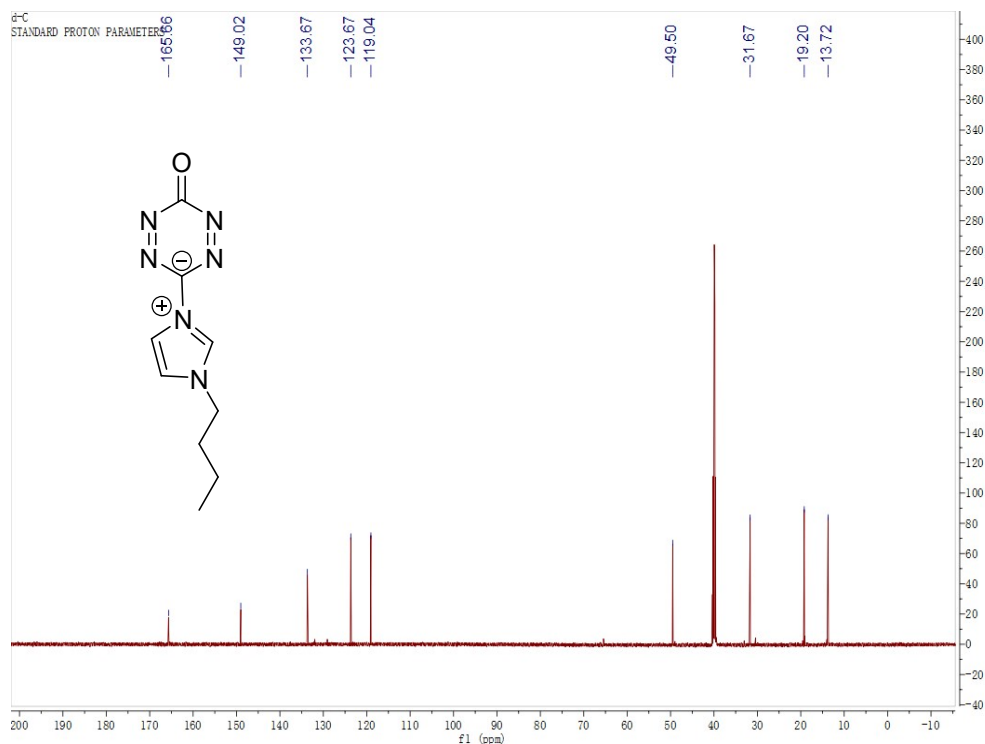

Figure S13.  $^{13}\text{C-NMR}$  spectra of 3d in  $\text{DMSO-}d_6$

DJ#213 RT: 2.07 AV: 1 NL: 7.27E8  
T: FTMS + p ESI Full ms [150.0000-2000.0000]

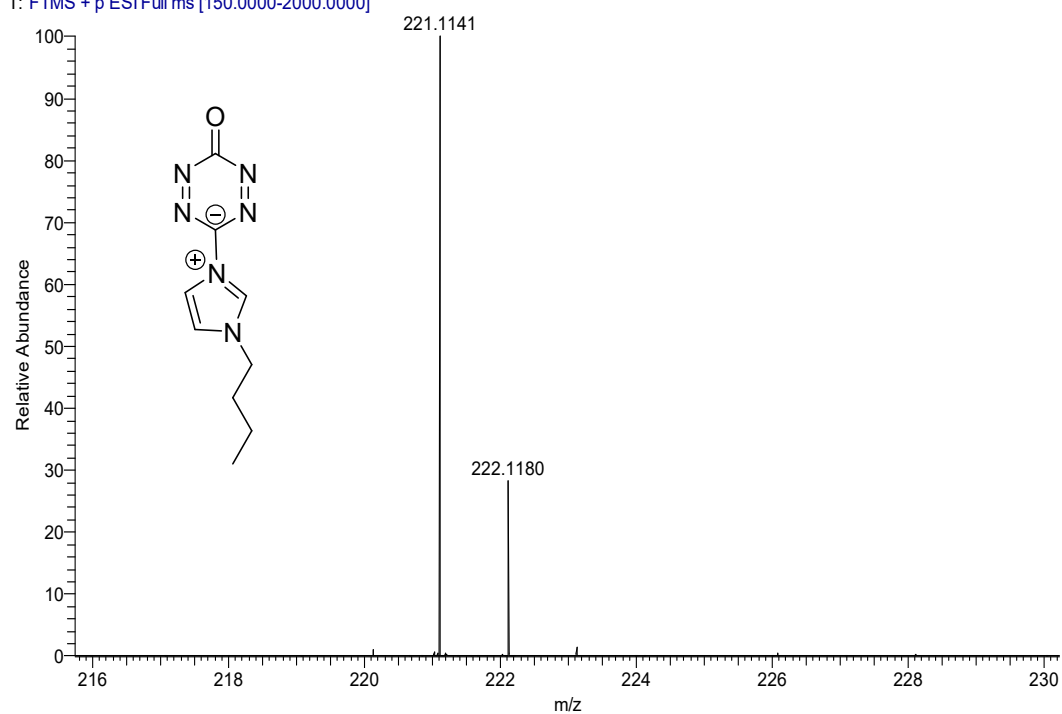

Figure S14. HRMS spectra of 3d in DMSO- $d_6$

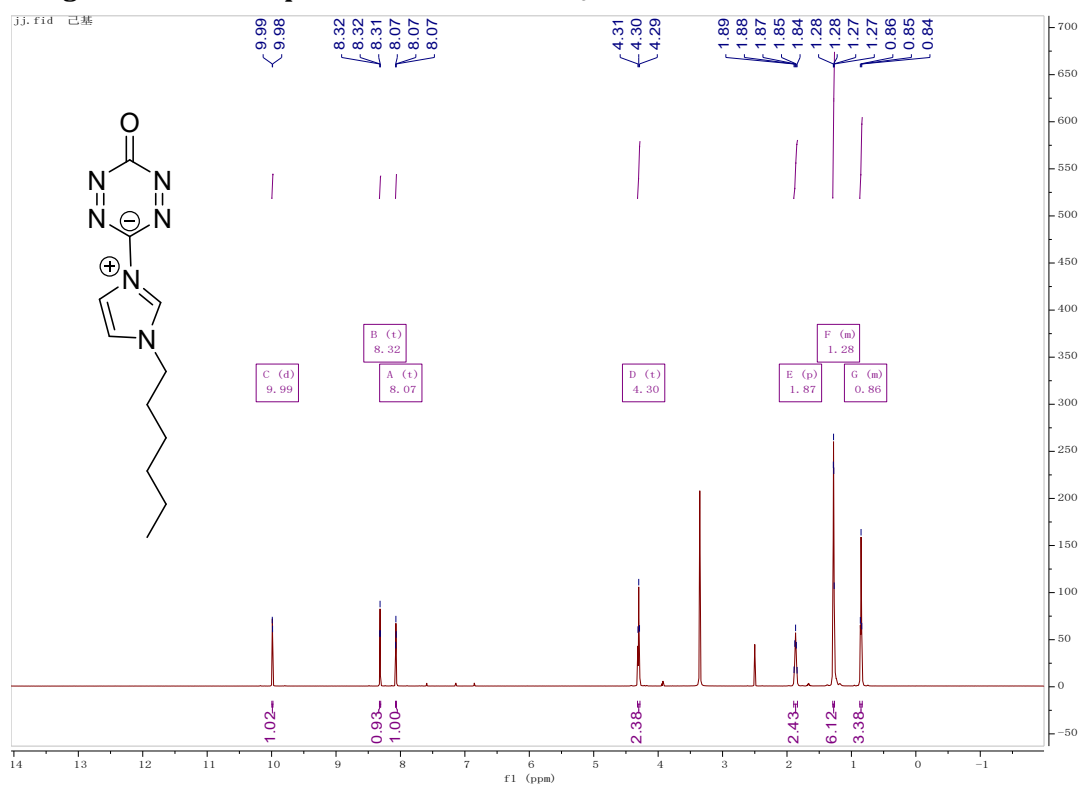

Figure S15.  $^1\text{H-NMR}$  spectra of 3e in DMSO- $d_6$

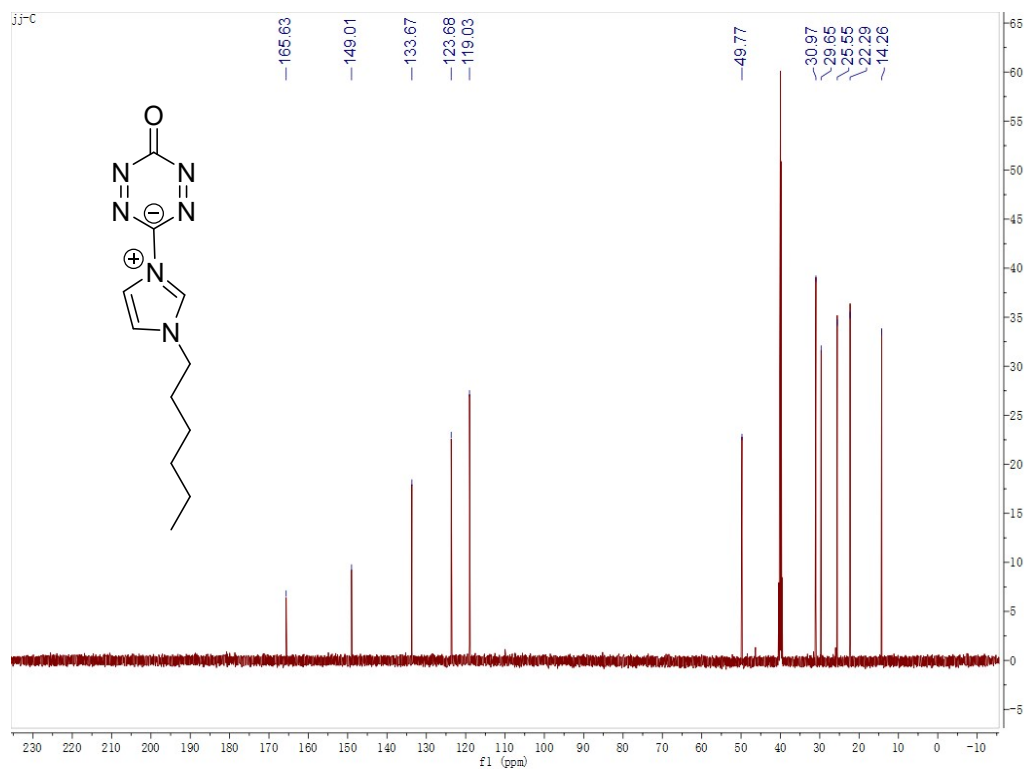

Figure S16.  $^{13}\text{C}$ -NMR spectra of 3e in  $\text{DMSO-}d_6$

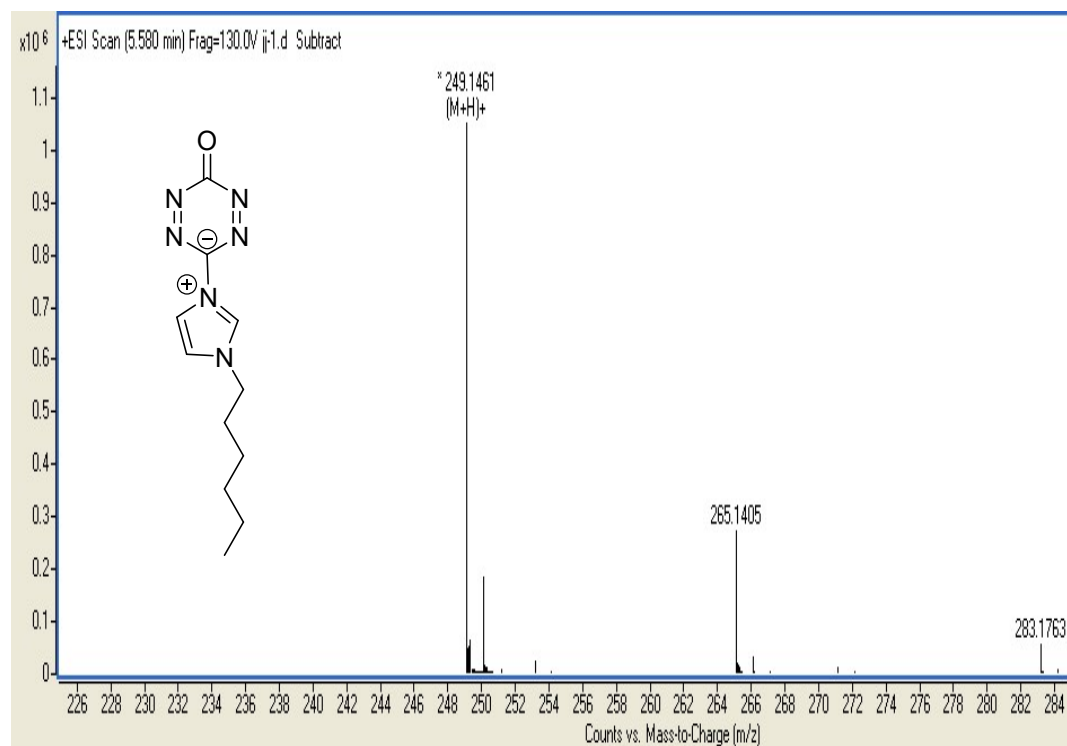

Figure S17. HRMS spectra of 3e in  $\text{DMSO-}d_6$

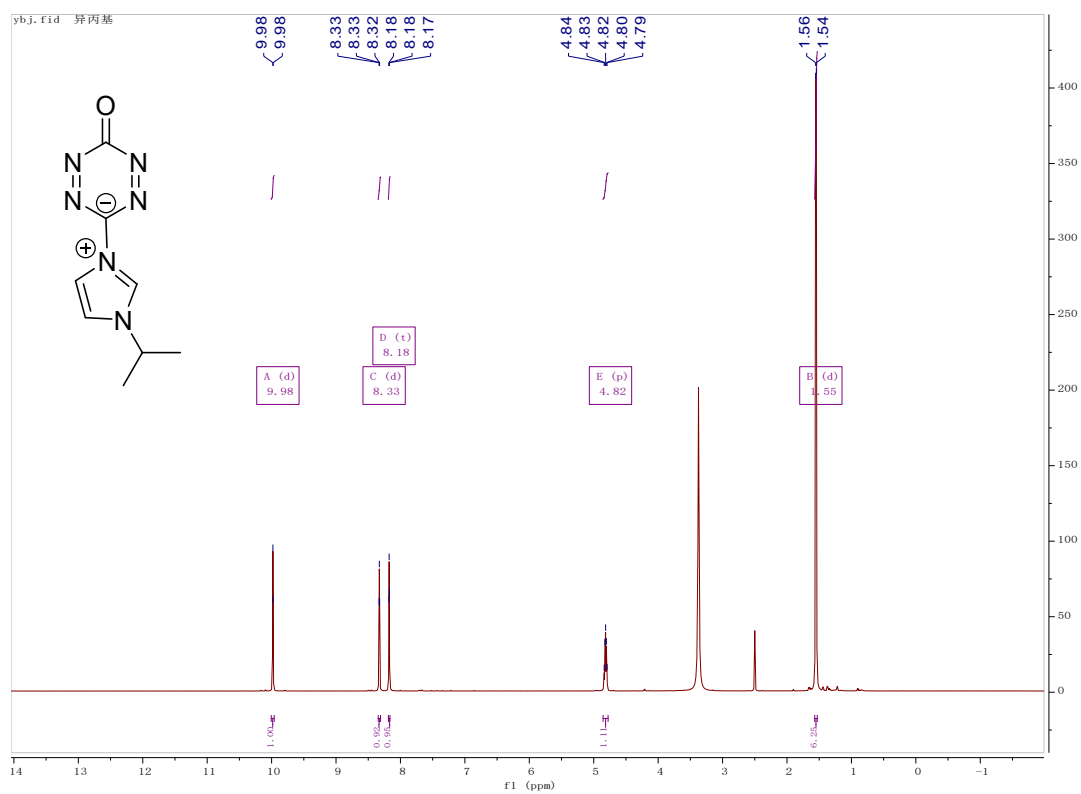

Figure S18.  $^1\text{H-NMR}$  spectra of 3f in  $\text{DMSO-}d_6$

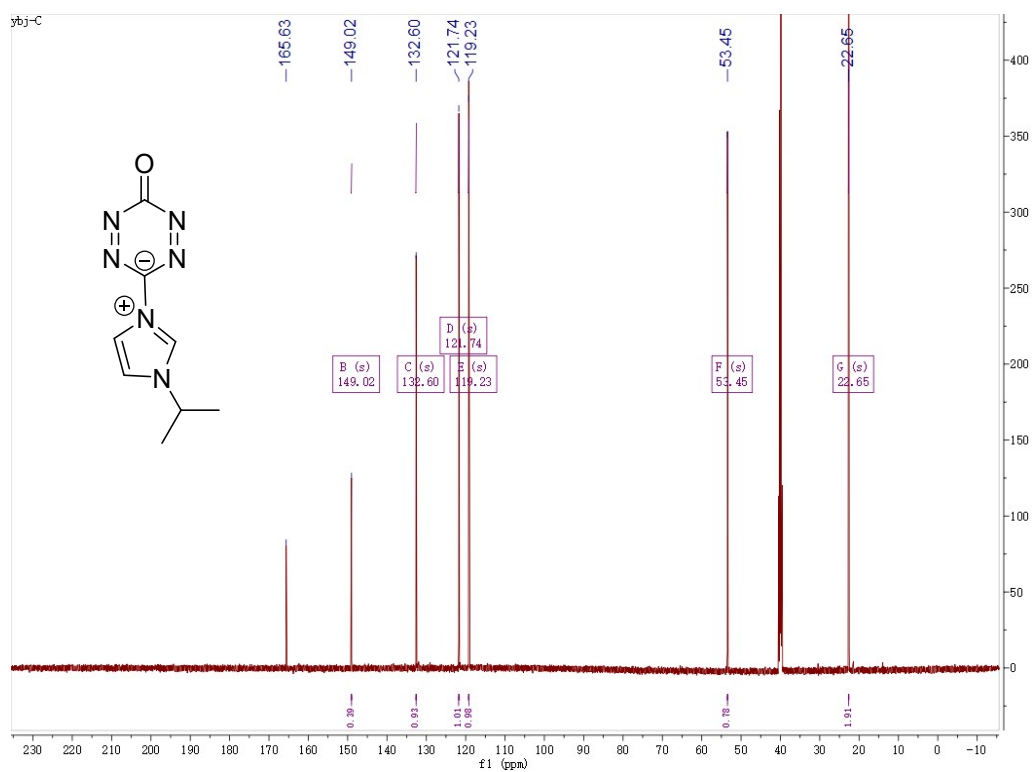

Figure S19.  $^{13}\text{C-NMR}$  spectra of 3f in  $\text{DMSO-}d_6$

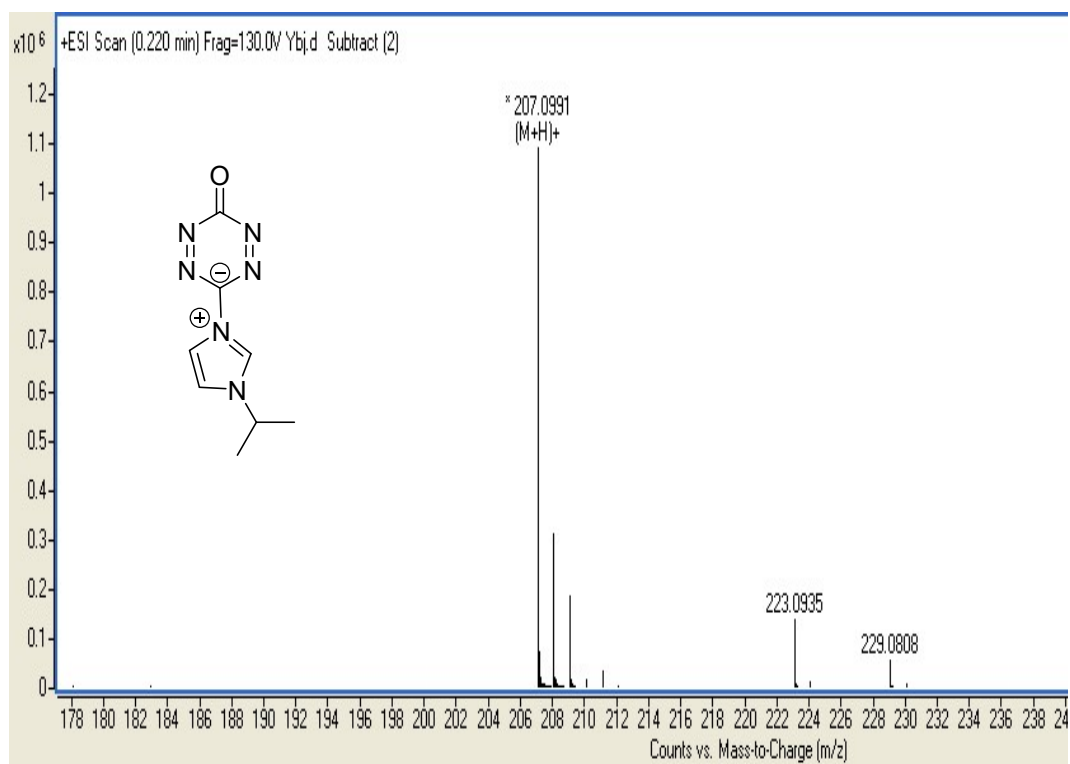

Figure S20. HRMS spectra of 3f in DMSO-*d*<sub>6</sub>

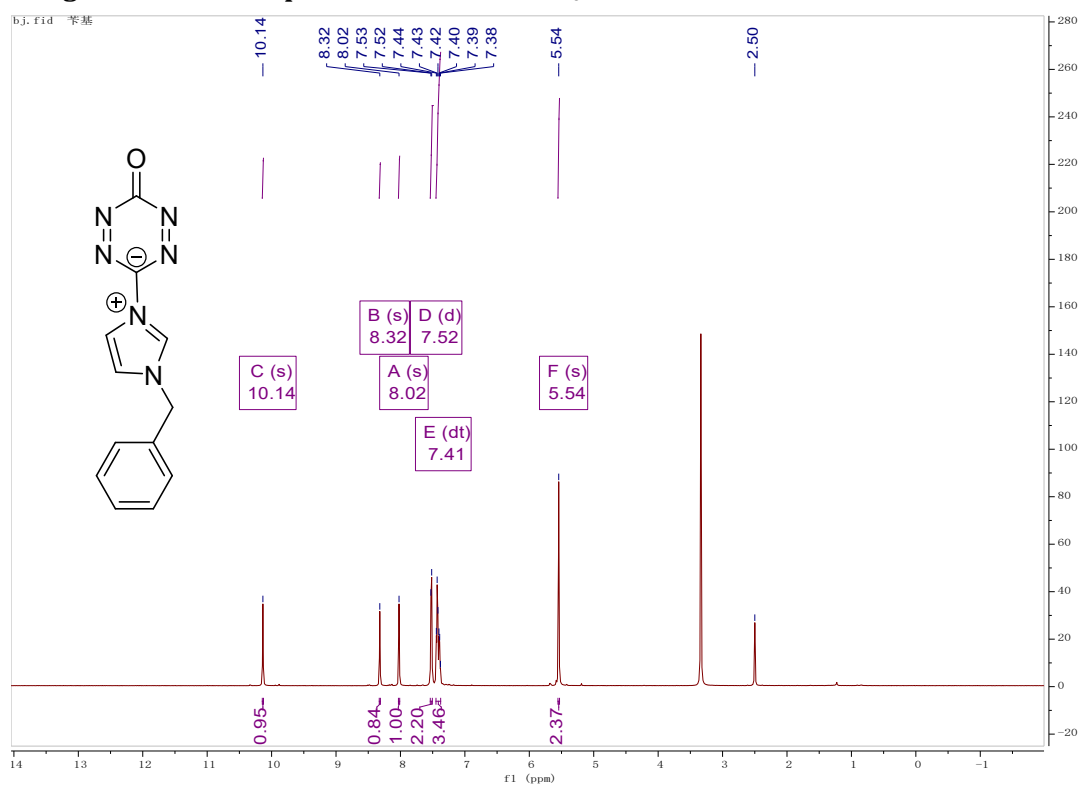

Figure S21. <sup>1</sup>H-NMR spectra of 3f in DMSO-*d*<sub>6</sub>

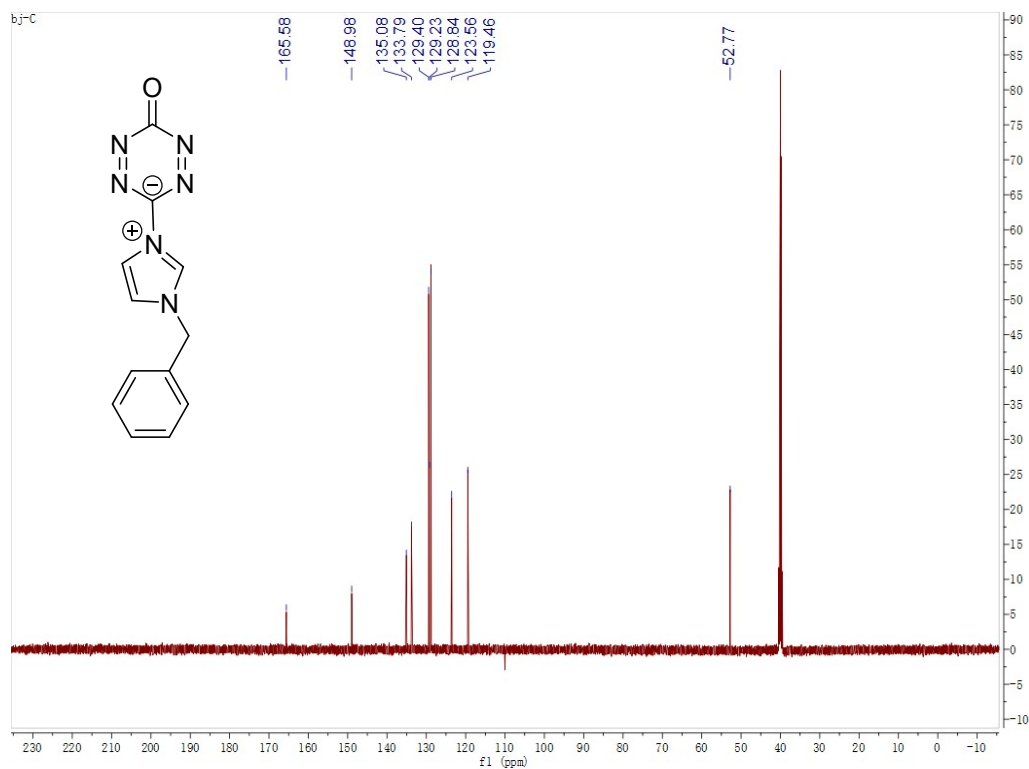

Figure S22. <sup>13</sup>C-NMR spectra of 3g in DMSO-d<sub>6</sub>

baj #247 RT: 2.41 AV: 1 NL: 1.70E9  
 T: FTMS + p ESI Full ms [150.0000-2000.0000]

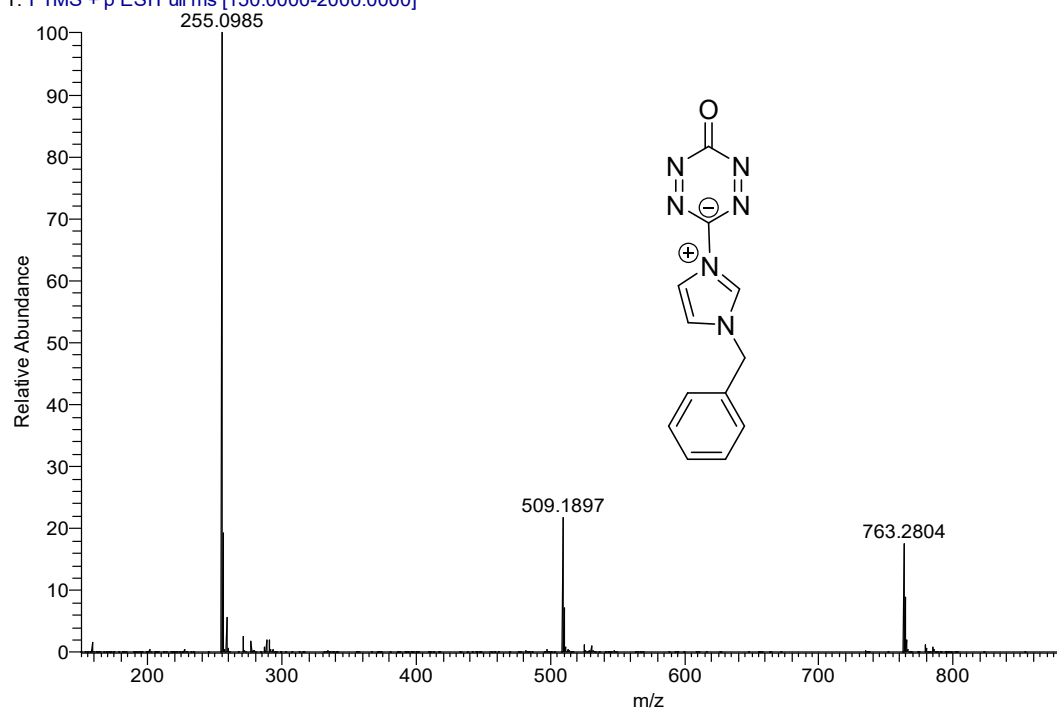

Figure S23. HRMS spectra of 3g in DMSO-d<sub>6</sub>

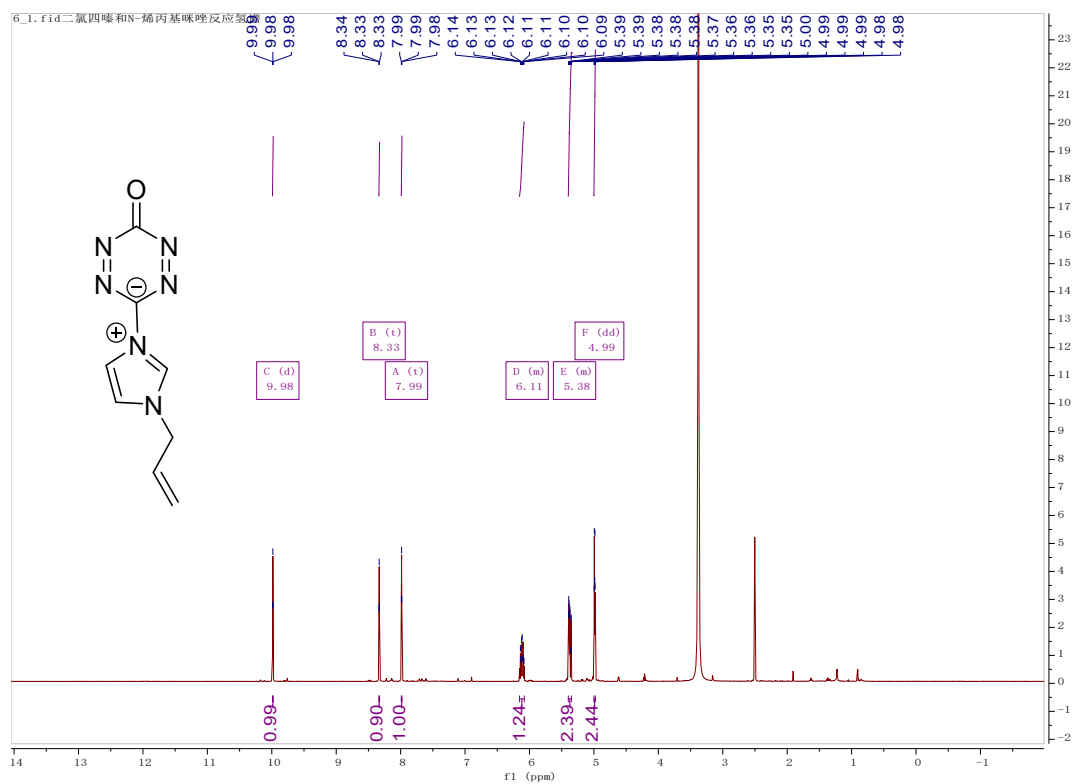

Figure S24.  $^1\text{H}$ -NMR spectra of 3h in  $\text{DMSO-}d_6$

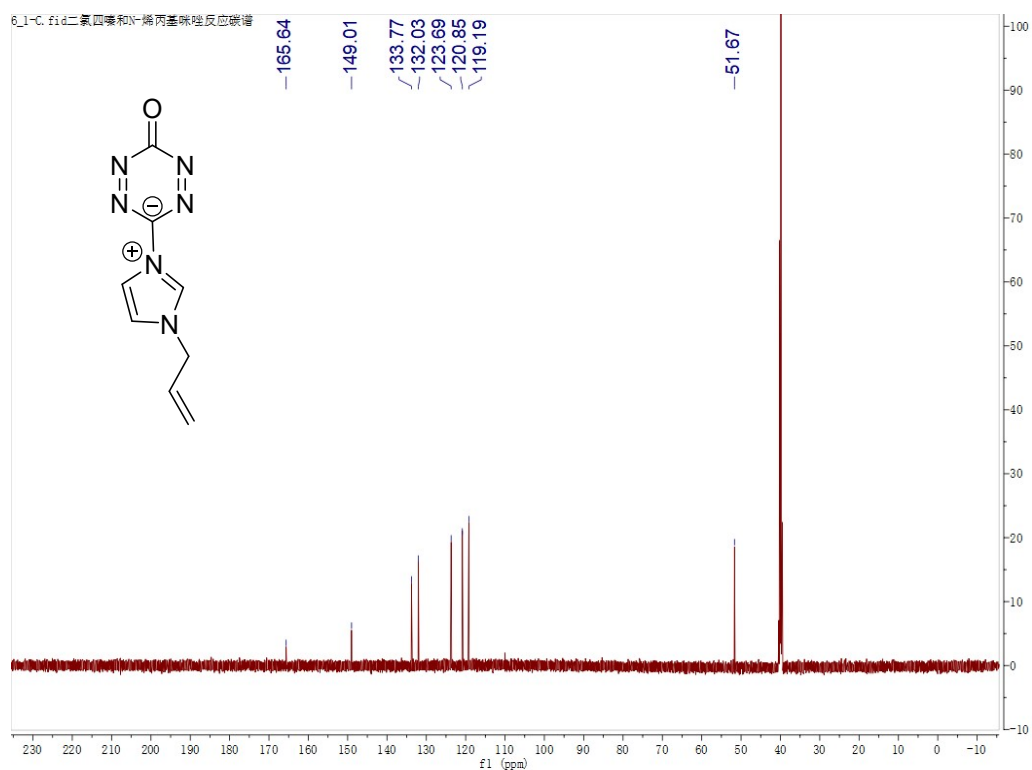

Figure S25.  $^{13}\text{C}$ -NMR spectra of 3h in  $\text{DMSO-}d_6$



XB #93 RT: 0.90 AV: 1 NL: 3.33E8  
T: FTMS + p ESI Full ms [150.0000-2000.0000]

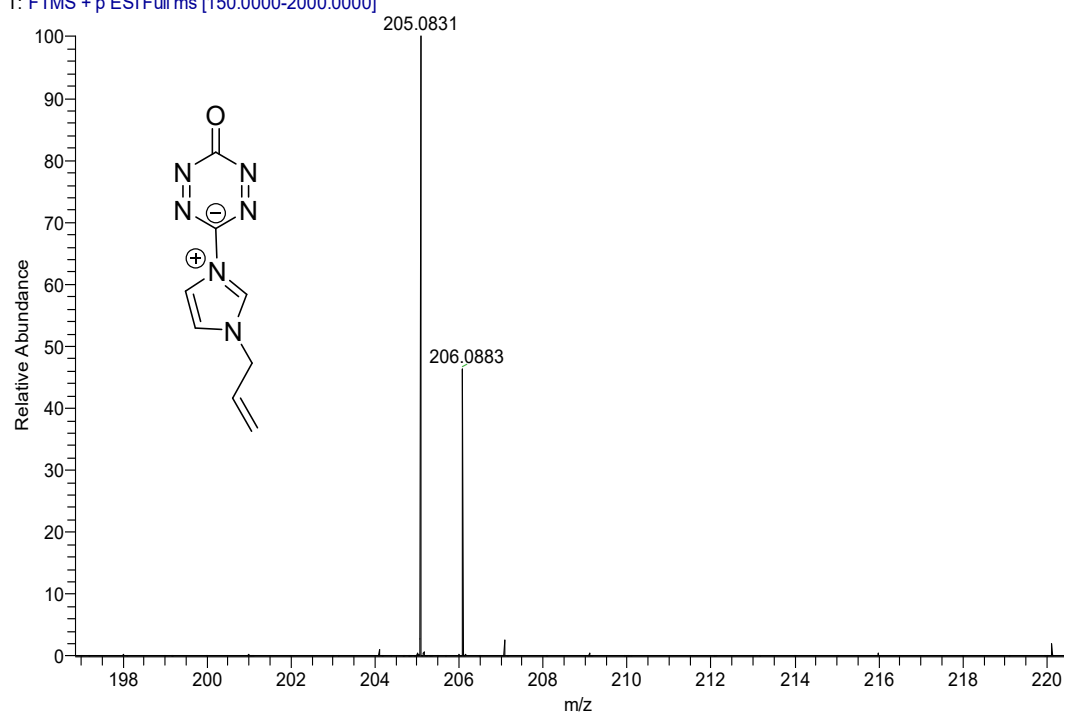

Figure S26. HRMS spectra of 3h in DMSO- $d_6$

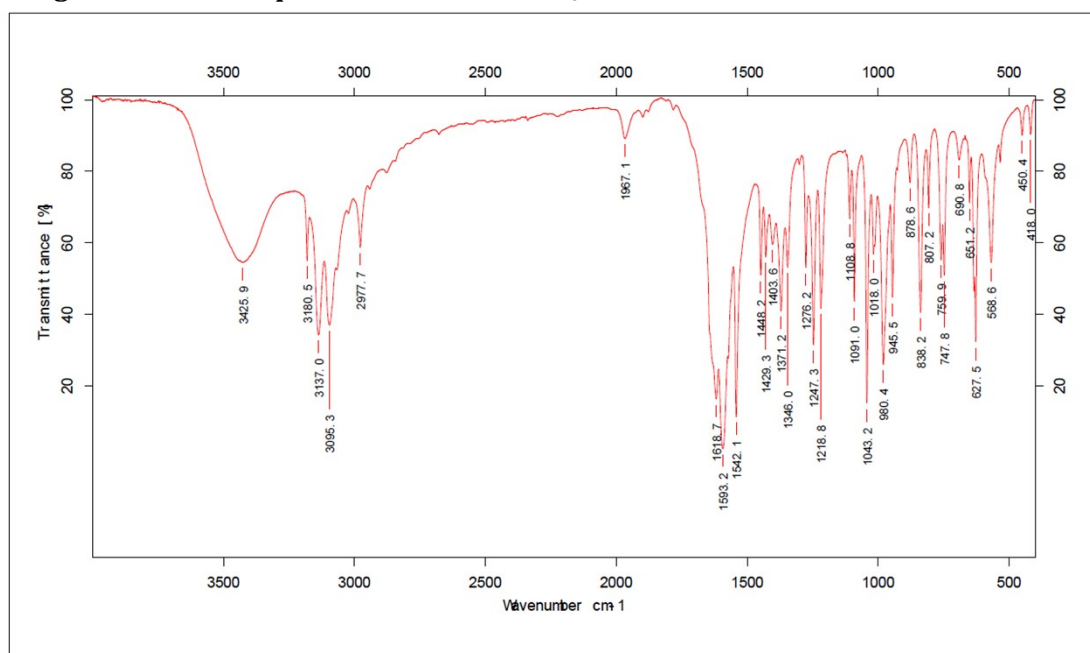

Figure S27. IR spectra of 3h

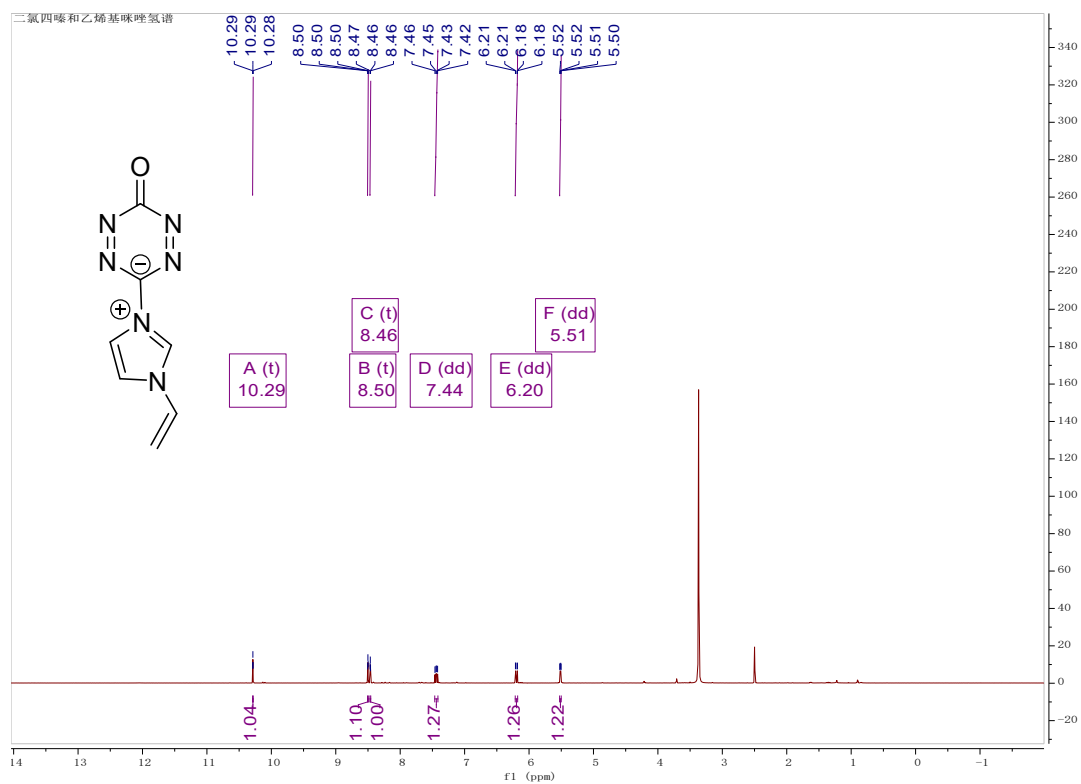

Figure S28.  $^1\text{H-NMR}$  spectra of 3i in  $\text{DMSO-d}_6$

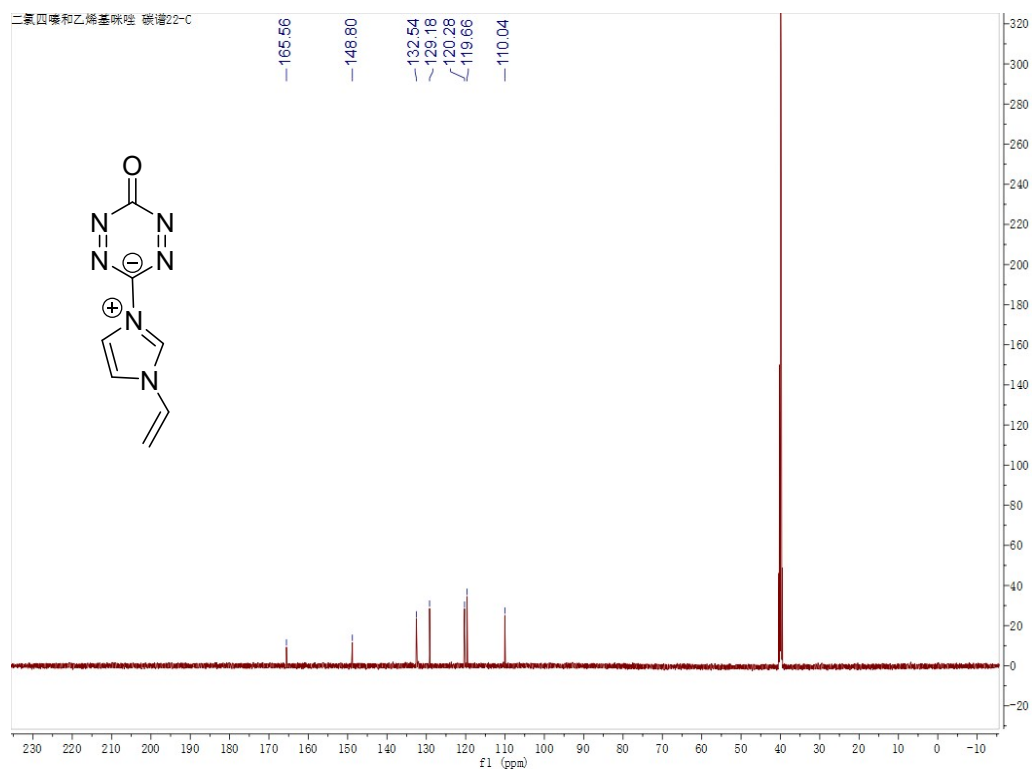

Figure S29.  $^{13}\text{C-NMR}$  spectra of 3i in  $\text{DMSO-d}_6$

2\_190524001155 #73 RT: 0.71 AV: 1 NL: 4.10E7  
T: FTMS + p ESI Full ms [150.0000-2000.0000]

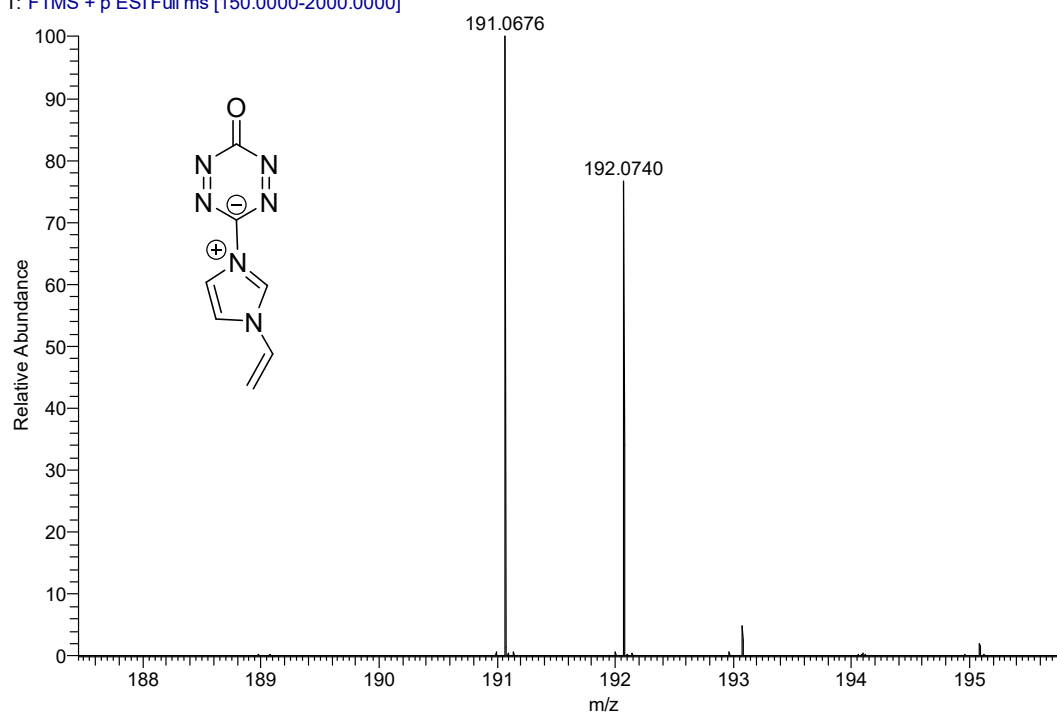

Figure S30. HRMS spectra of 3i in DMSO-d<sub>6</sub>

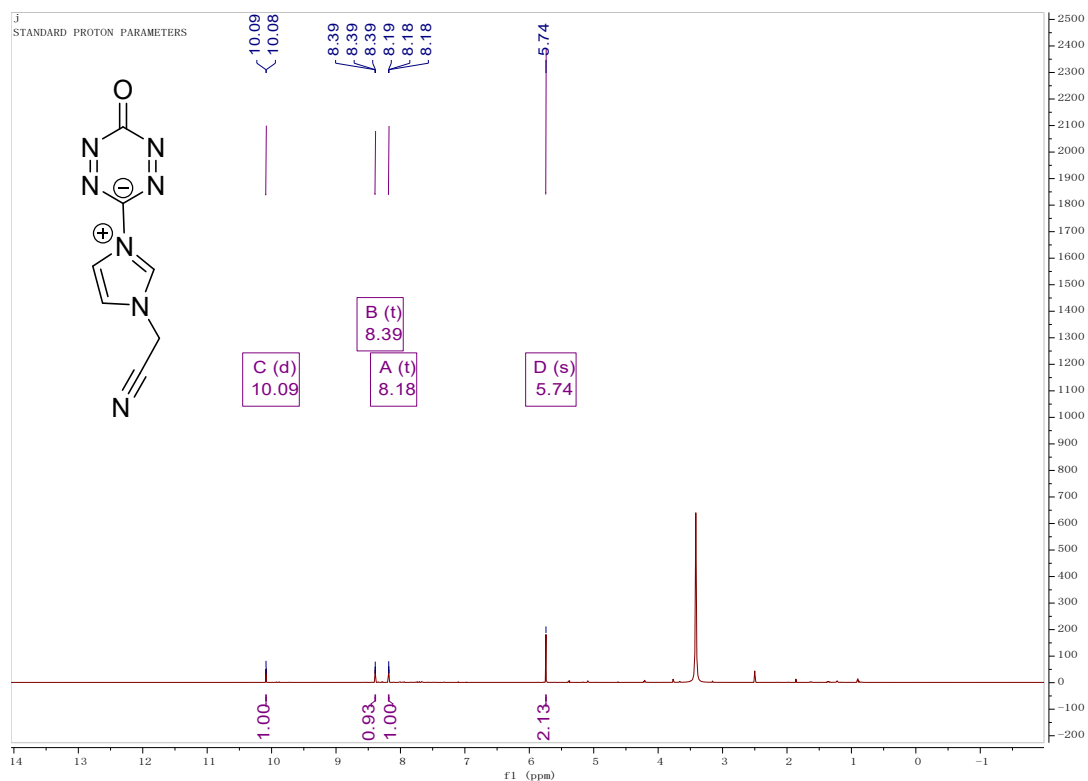

Figure S31. <sup>1</sup>H-NMR spectra of 3j in DMSO-d<sub>6</sub>

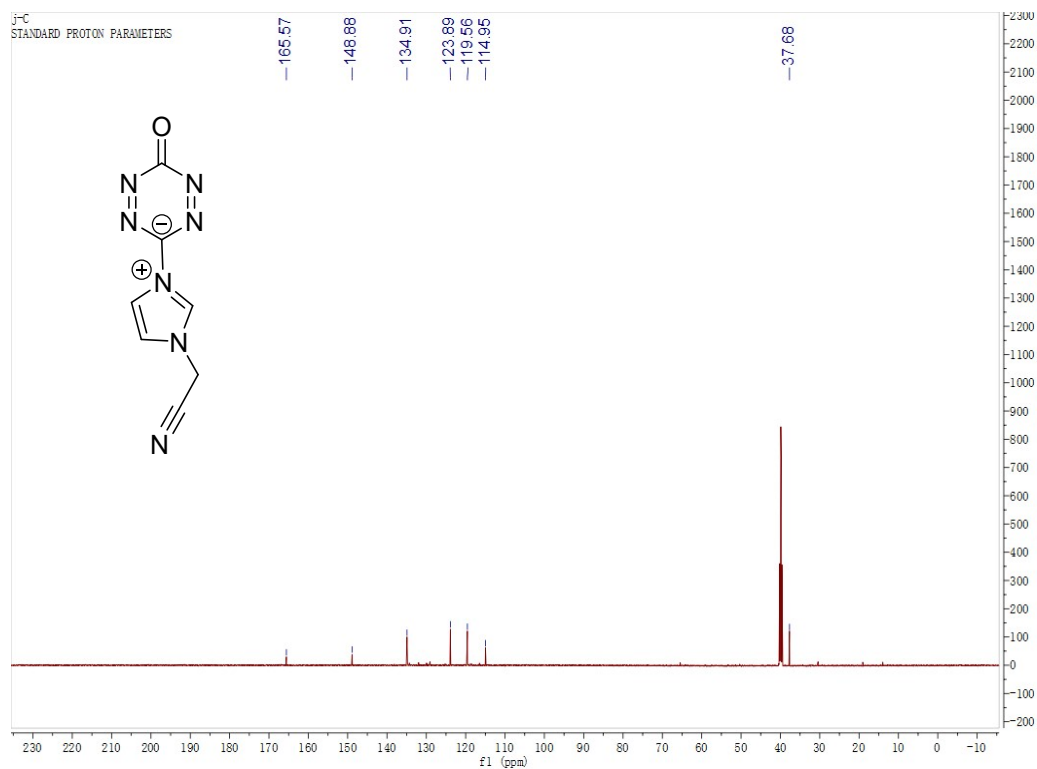

Figure S32. <sup>13</sup>C-NMR spectra of 3j in DMSO-*d*<sub>6</sub>

YJ #61 RT: 0.59 AV: 1 NL: 1.31E8  
T: FTMS + p ESI Full ms [150.0000-2000.0000]

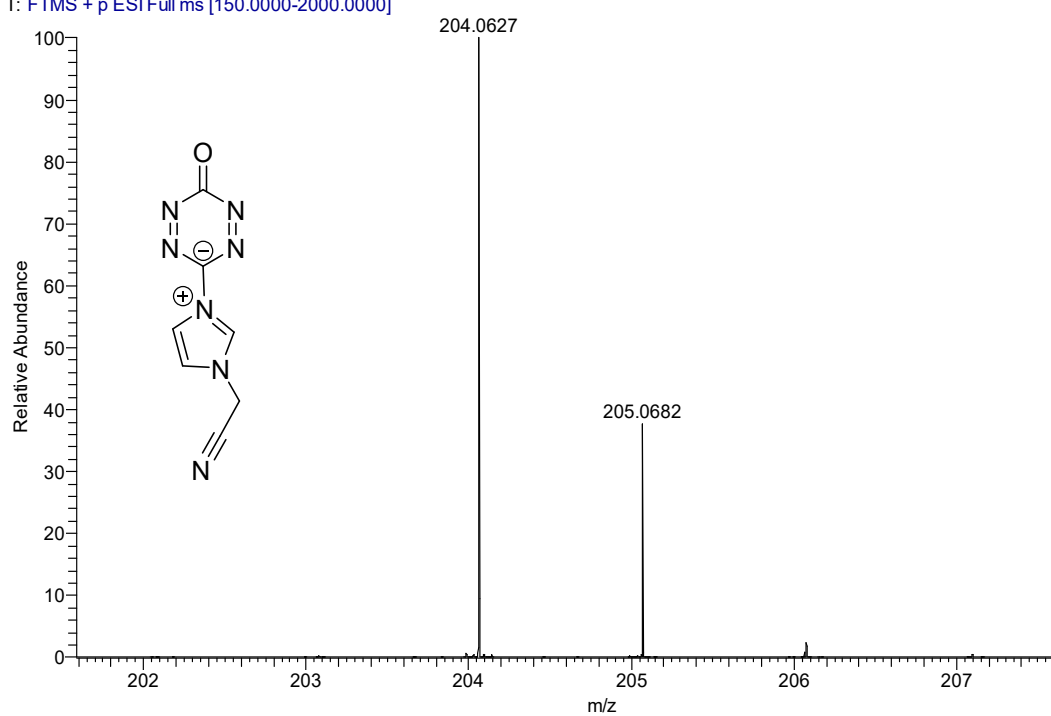

Figure S33. HRMS spectra of 3j in DMSO-*d*<sub>6</sub>

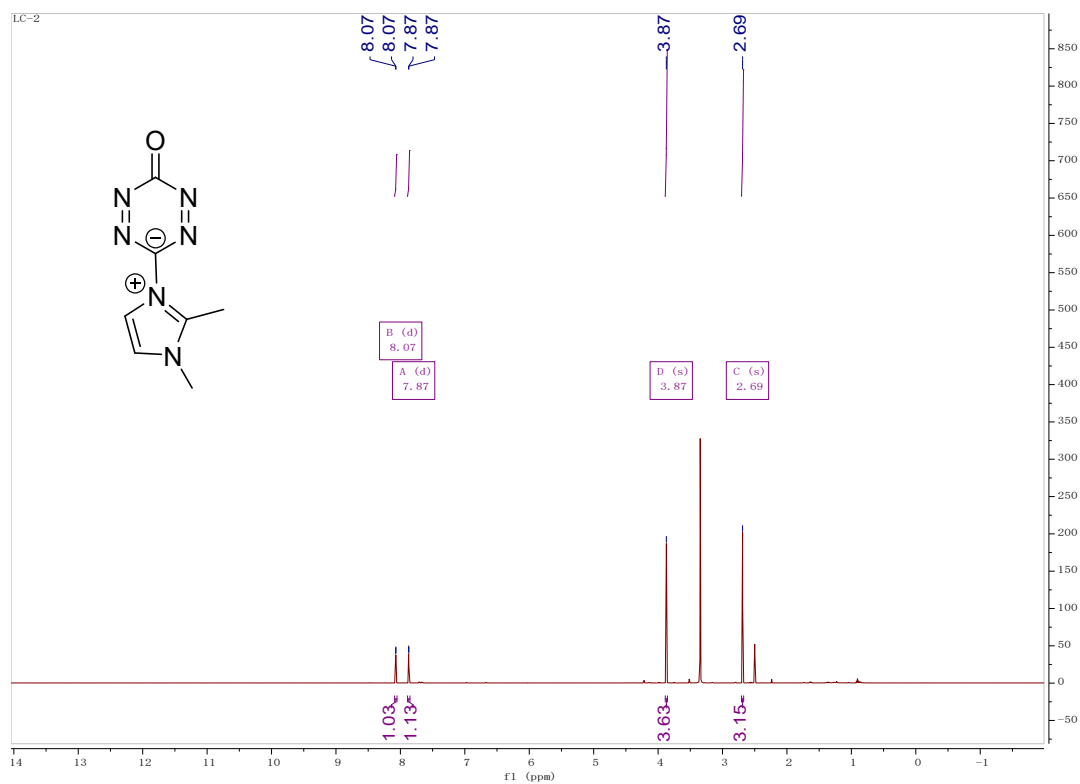

Figure S34.  $^1\text{H-NMR}$  spectra of 3k in  $\text{DMSO-}d_6$

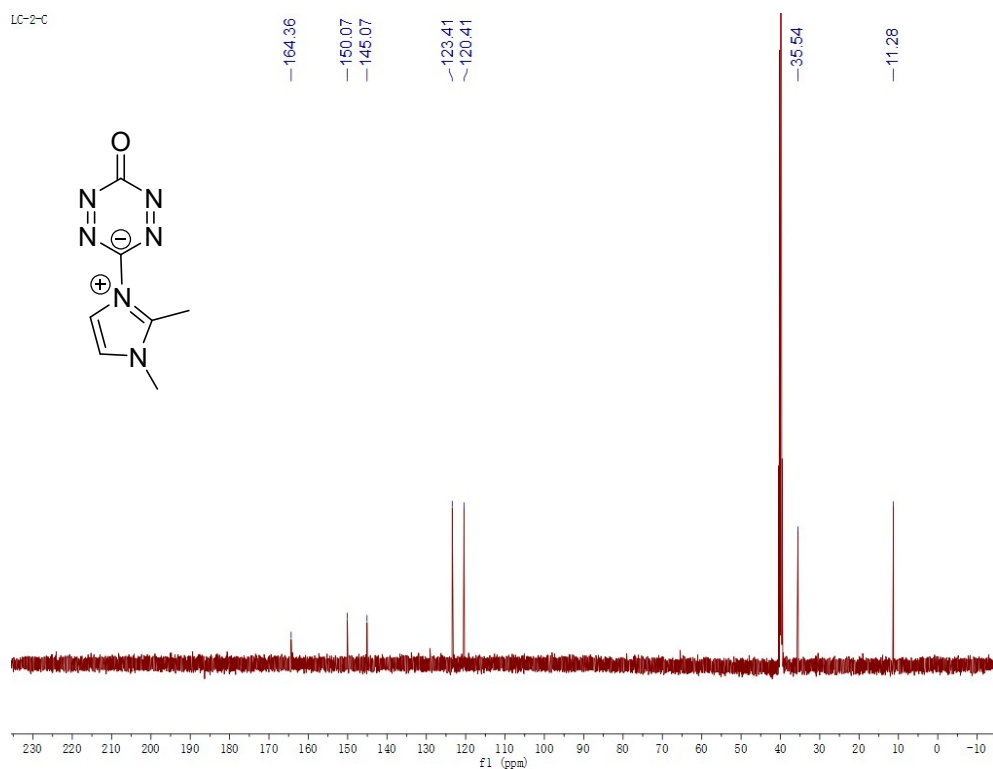

Figure S35.  $^{13}\text{C-NMR}$  spectra of 3k in  $\text{DMSO-}d_6$

5.9 #55 RT: 0.54 AV: 1 NL: 8.49E8  
T: FTMS + p ESI Full ms [100.0000-1500.0000]

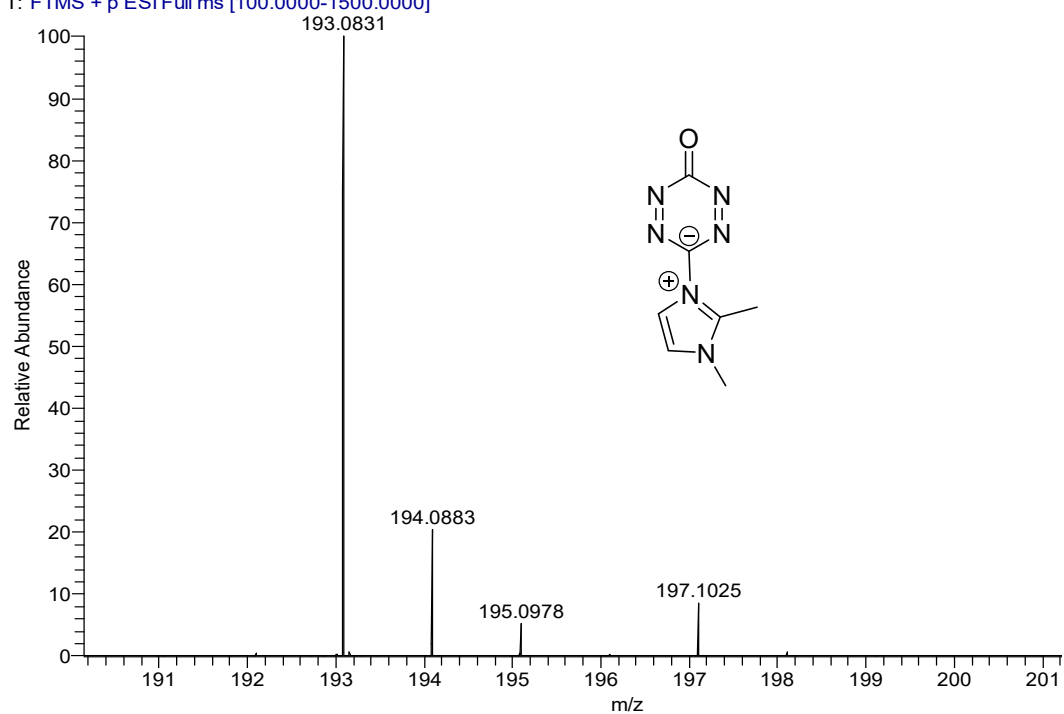

Figure S36. HRMS spectra of 3k in DMSO- $d_6$

9.1 #57 RT: 0.55 AV: 1 NL: 1.39E9  
: FTMS + p ESI Full ms [100.0000-1500.0000]

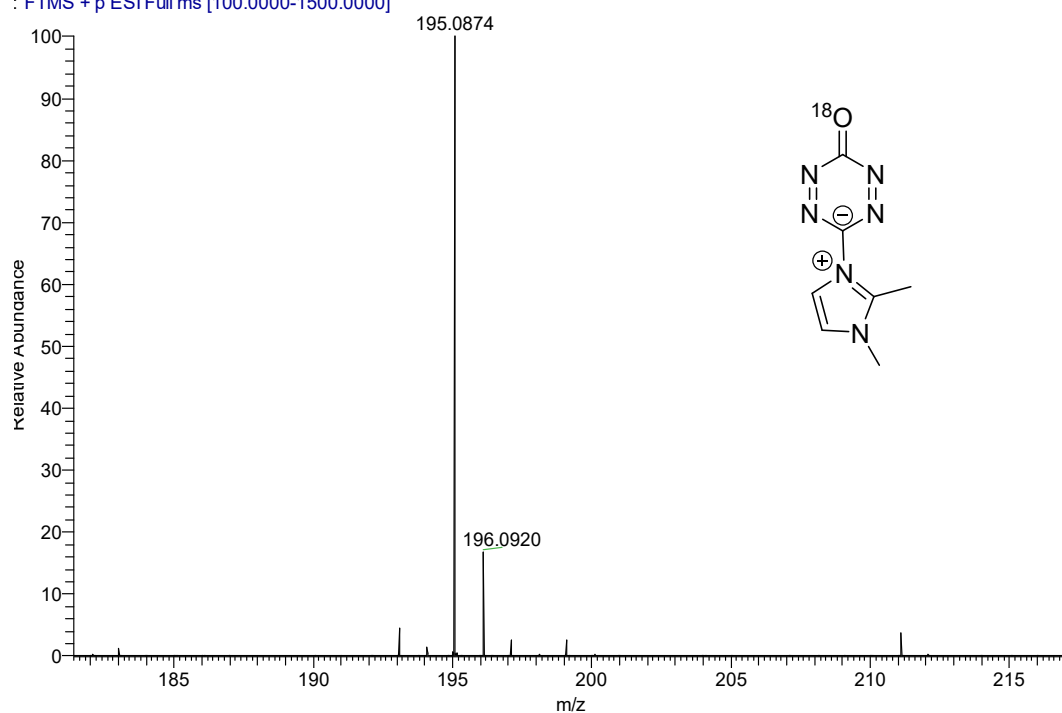

Figure S37. HRMS spectra of 3k- $^{18}\text{O}$  in DMSO- $d_6$

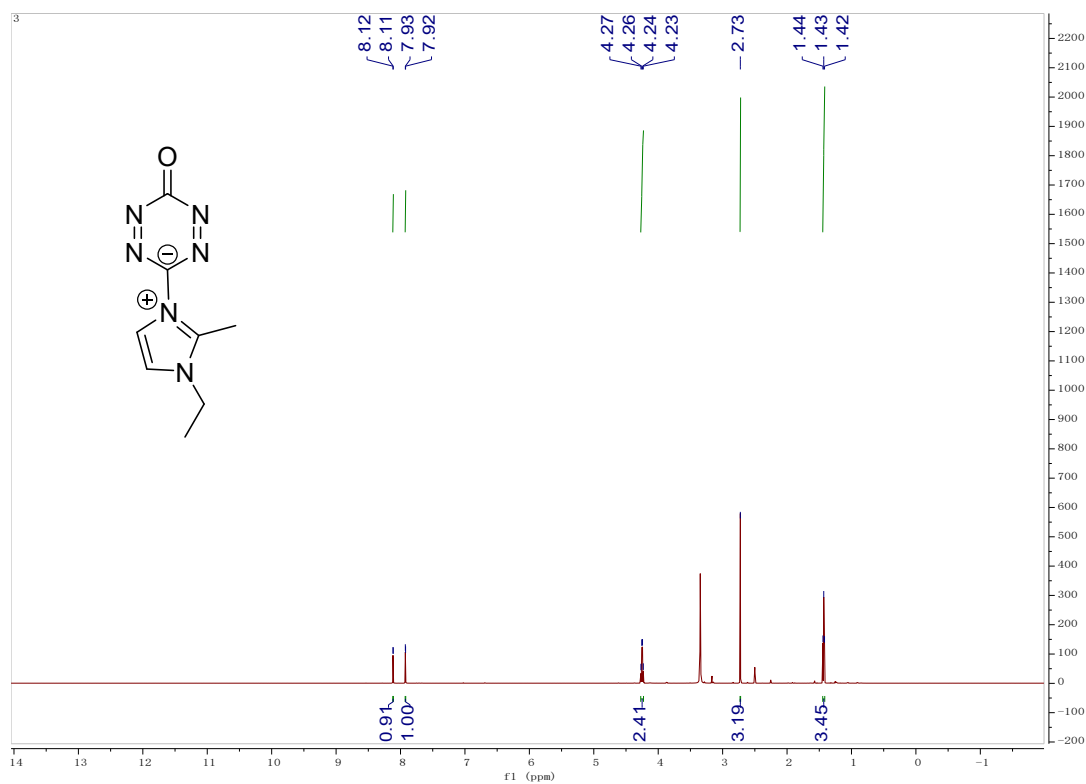

Figure S38.  $^1\text{H-NMR}$  spectra of 31 in  $\text{DMSO-}d_6$

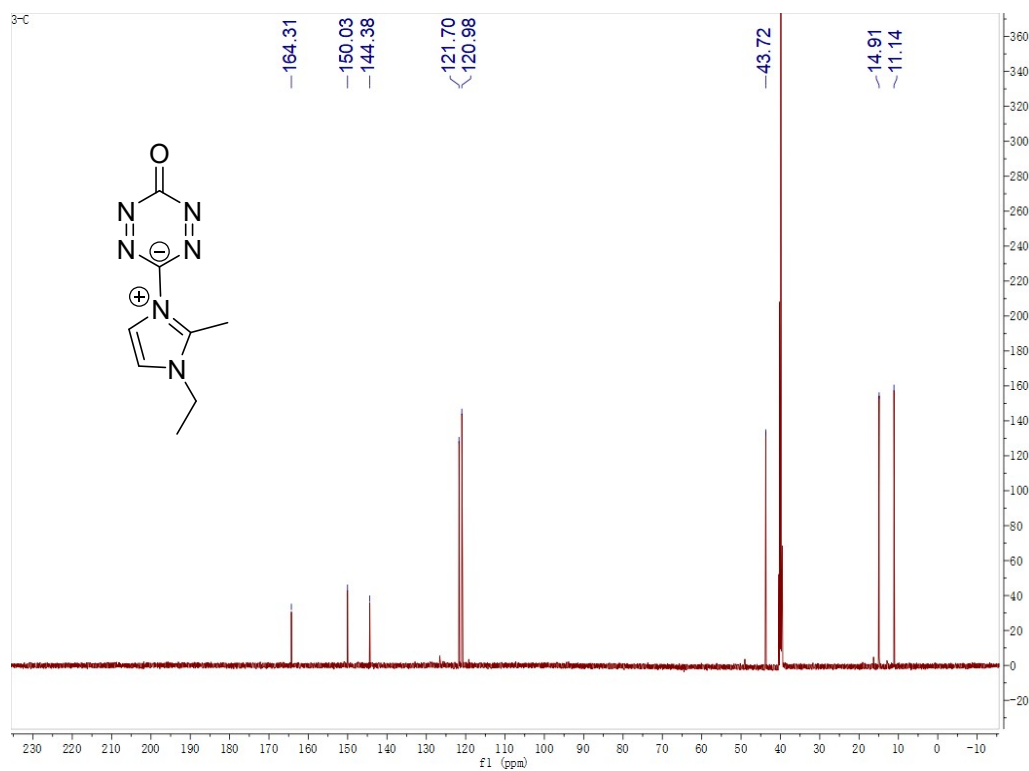

Figure S39.  $^{13}\text{C-NMR}$  spectra of 31 in  $\text{DMSO-}d_6$

3 #83 RT: 0.81 AV: 1 NL: 1.15E10  
T: FTMS + p ESI Full ms [100.0000-1500.0000]

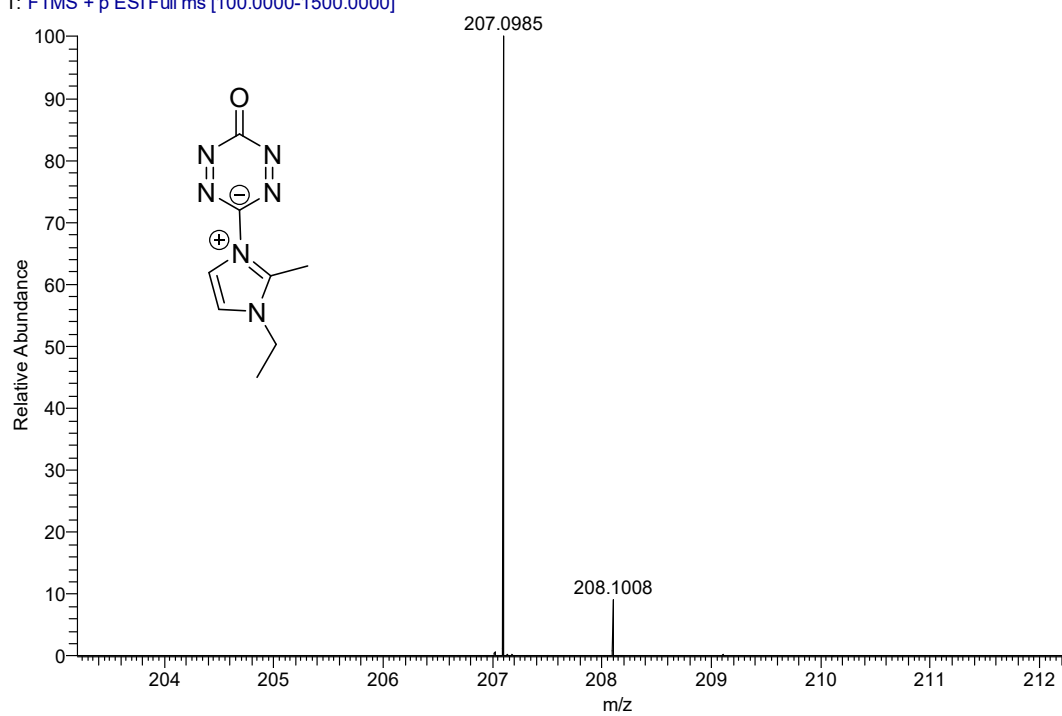

Figure S40. HRMS spectra of 31 in DMSO- $d_6$

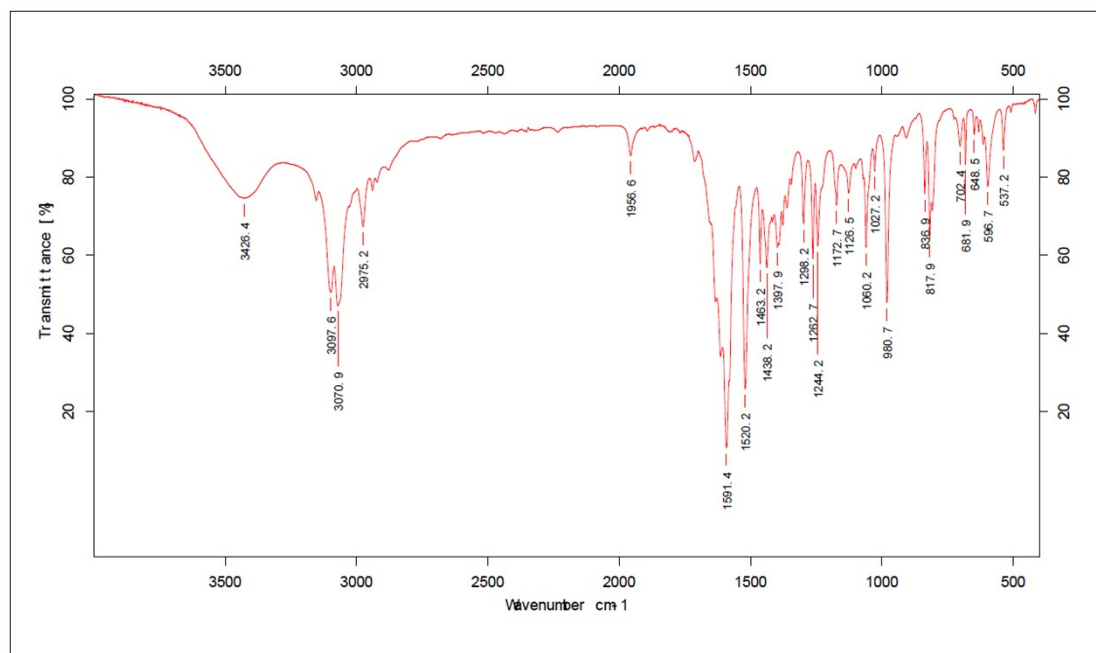

Figure S41. IR spectra of 31



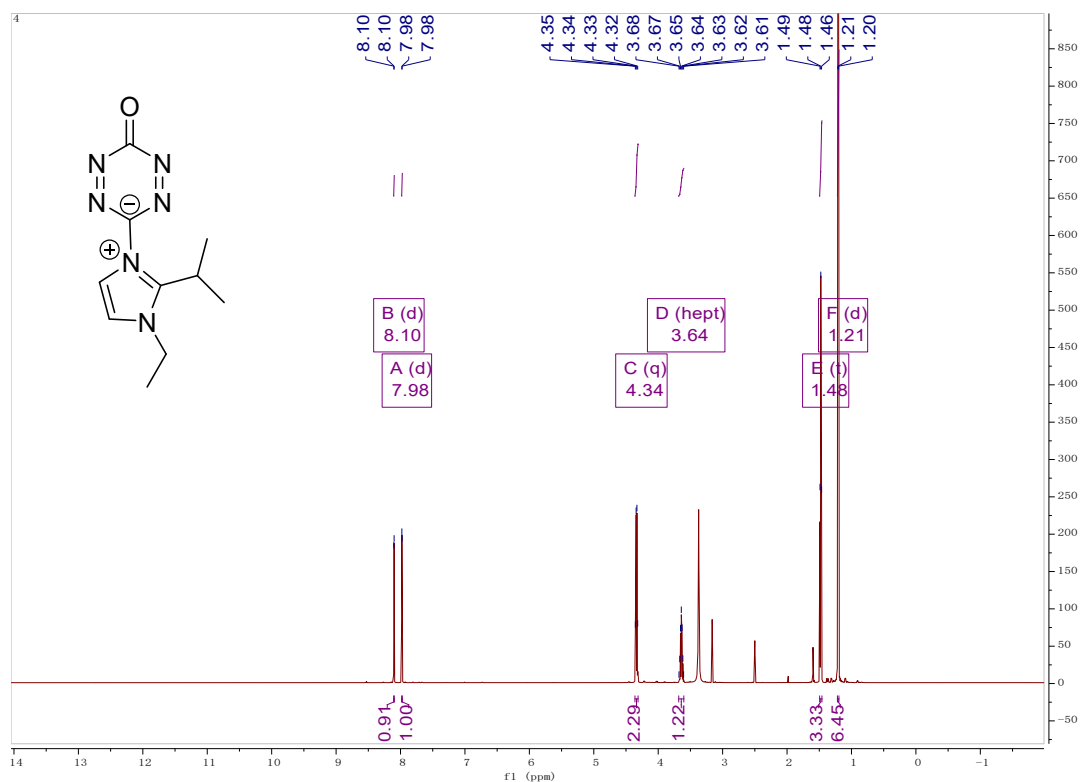

Figure S42.  $^1\text{H}$ -NMR spectra of 3m in  $\text{DMSO-}d_6$

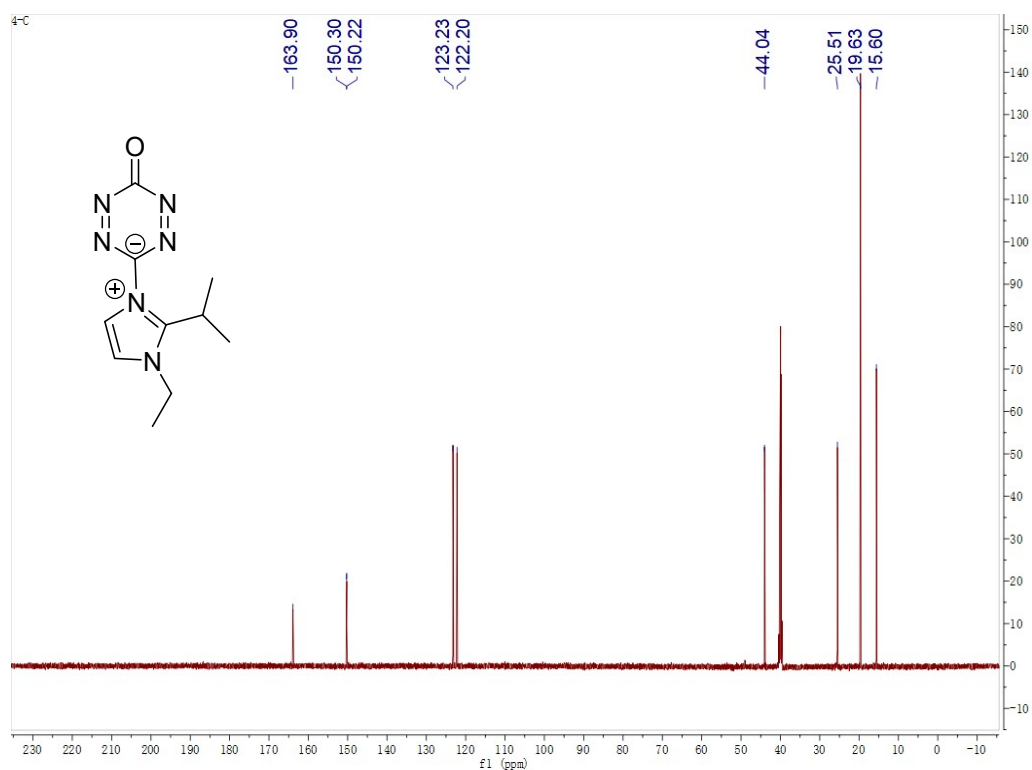

Figure S43.  $^{13}\text{C}$ -NMR spectra of 3m in  $\text{DMSO-}d_6$

4 #49 RT: 0.48 AV: 1 NL: 5.59E9  
T: FTMS + p ESI Full ms [100.0000-1500.0000]

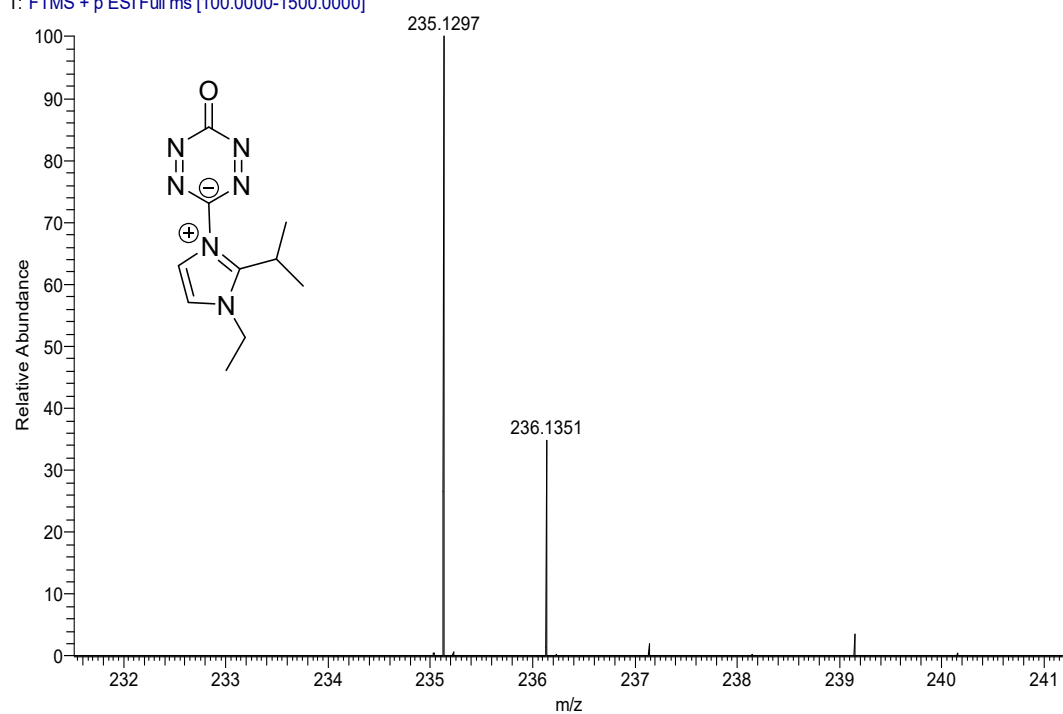

Figure S44. HRMS spectra of 3m in DMSO- $d_6$

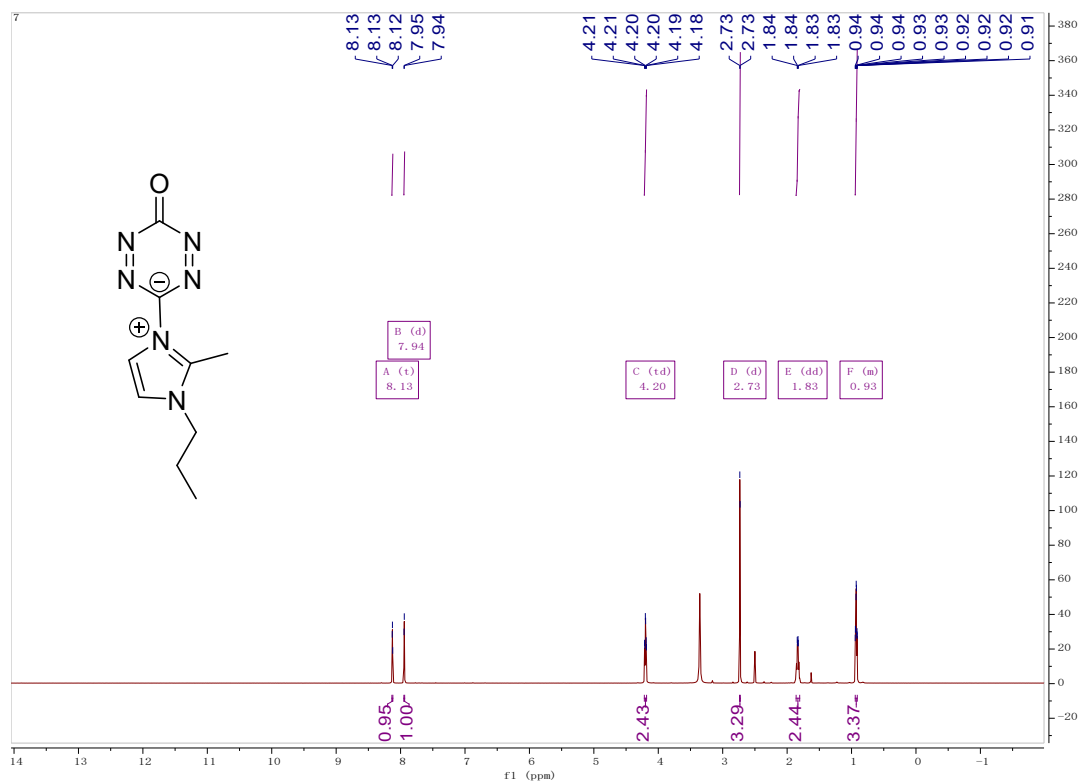

Figure S45.  $^1\text{H-NMR}$  spectra of 3n in DMSO- $d_6$

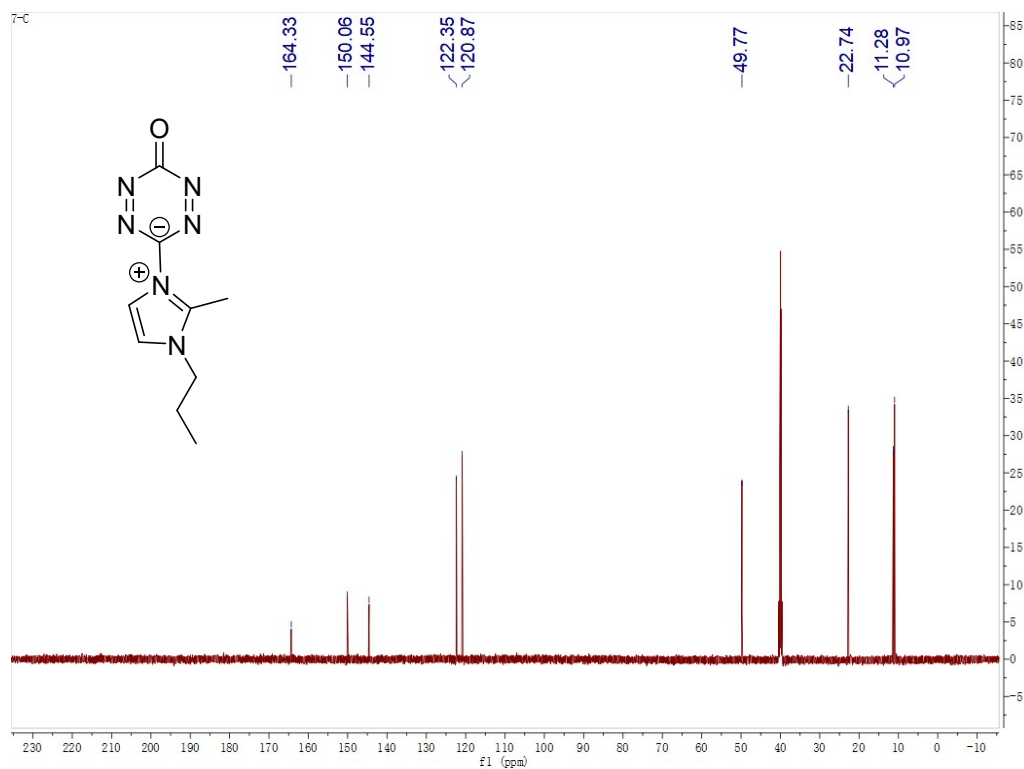

Figure S46.  $^{13}\text{C}$ -NMR spectra of 3n in  $\text{DMSO-}d_6$

7\_191203220649 #167 RT: 1.62 AV: 1 NL: 1.80E10  
 T: FTMS + p ESI Full ms [100.0000-1500.0000]

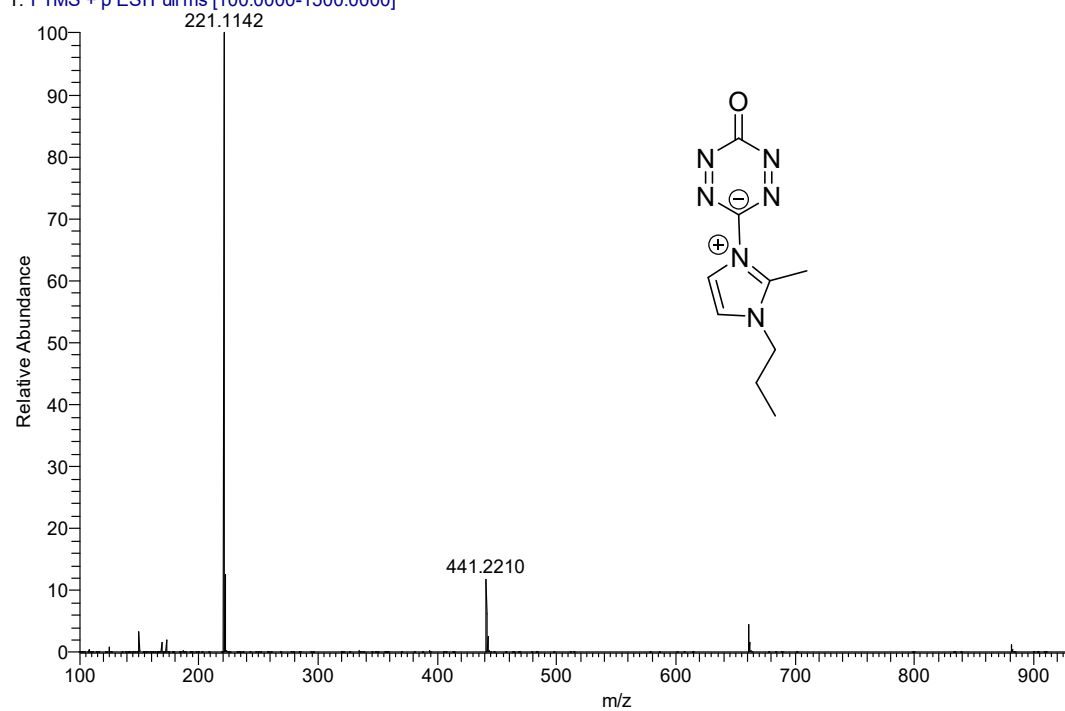

Figure S47. HRMS spectra of 3n in  $\text{DMSO-}d_6$

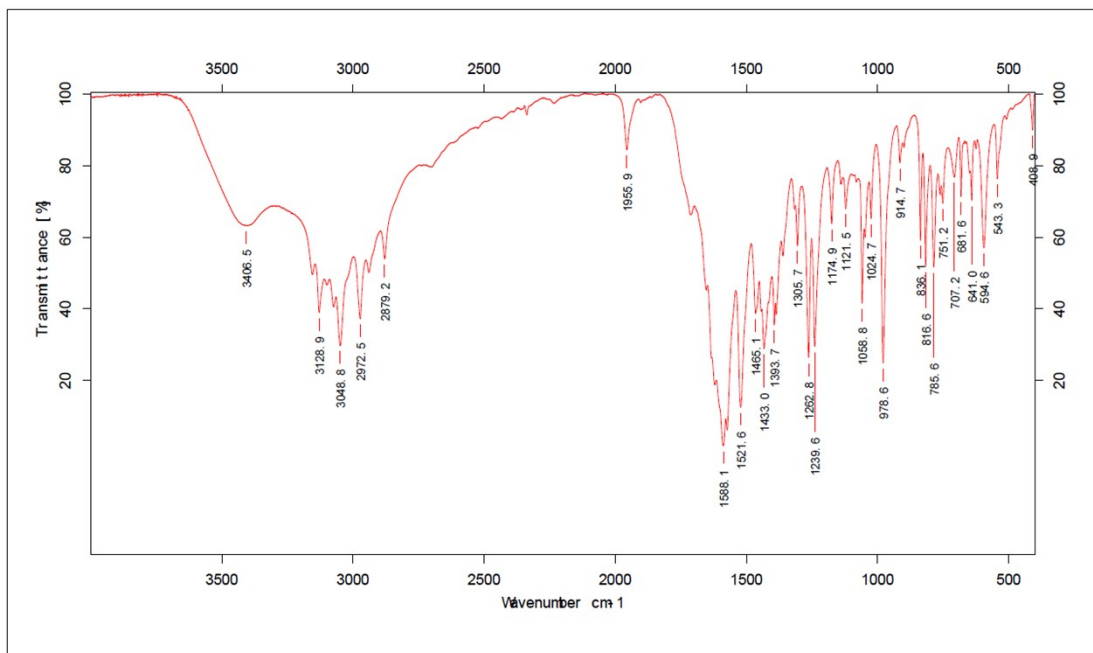

Figure S48. IR spectra of 3n

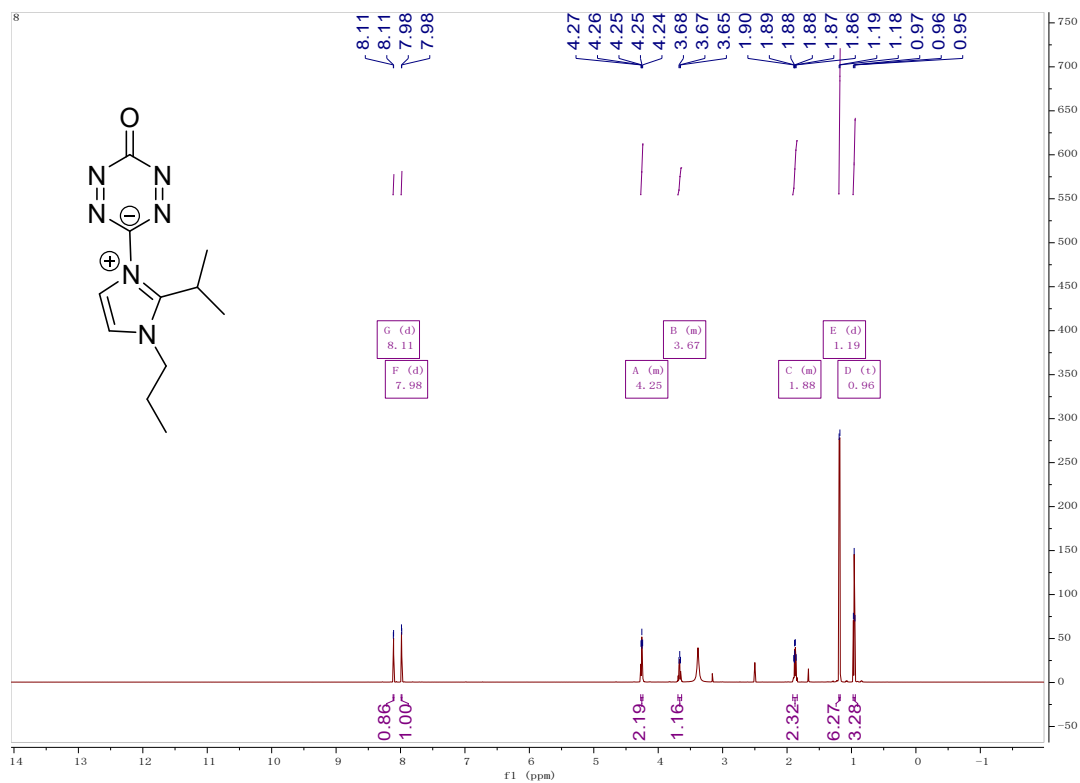

Figure S49. <sup>1</sup>H-NMR spectra of 3o in DMSO-d<sub>6</sub>

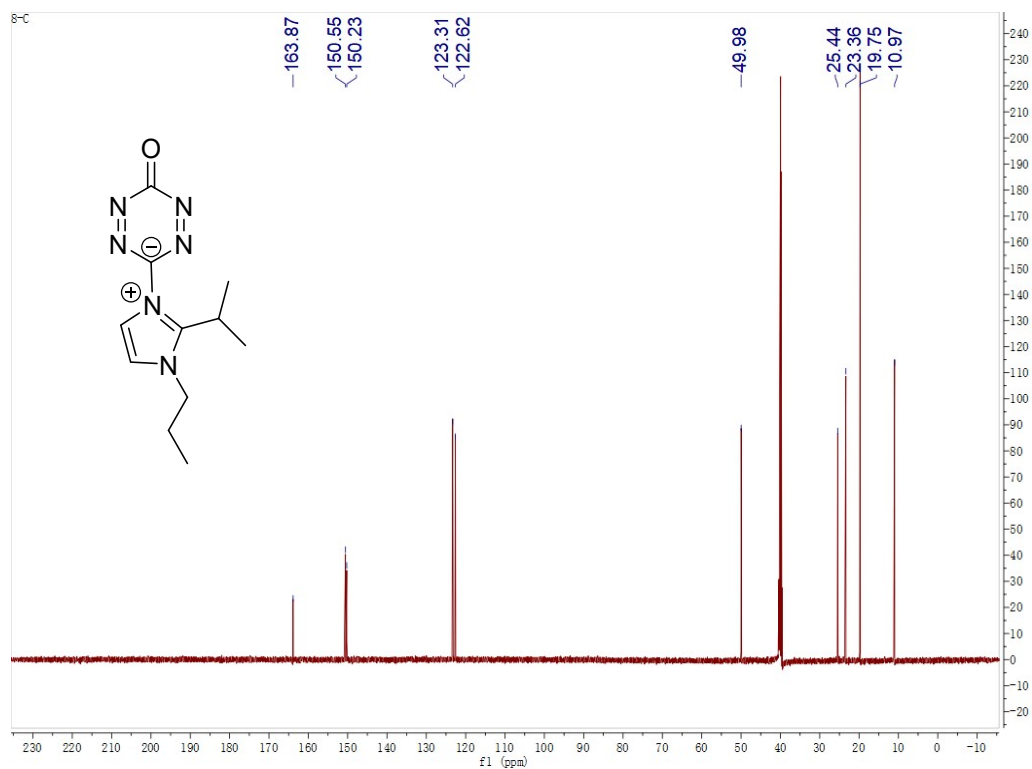

Figure S50.  $^{13}\text{C}$ -NMR spectra of 3o in  $\text{DMSO-}d_6$

8\_191203221438 #247 RT: 2.40 AV: 1 NL: 1.13E10  
 T: FTMS + p ESI Full ms [100.0000-1500.0000]

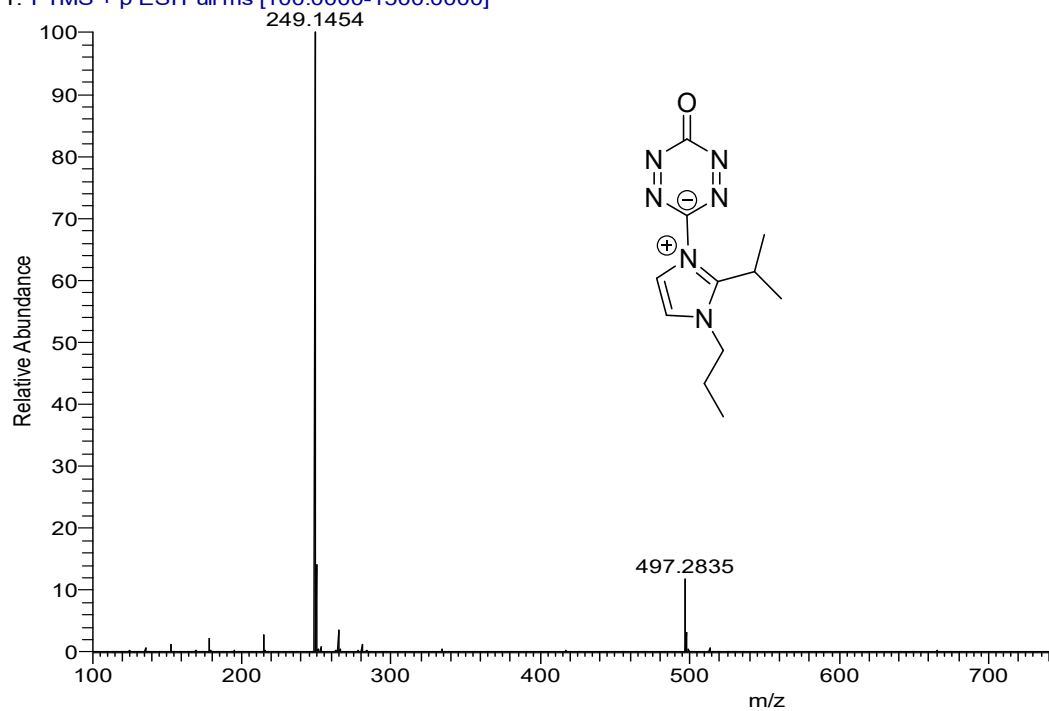

Figure S51. HRMS spectra of 3o in  $\text{DMSO-}d_6$

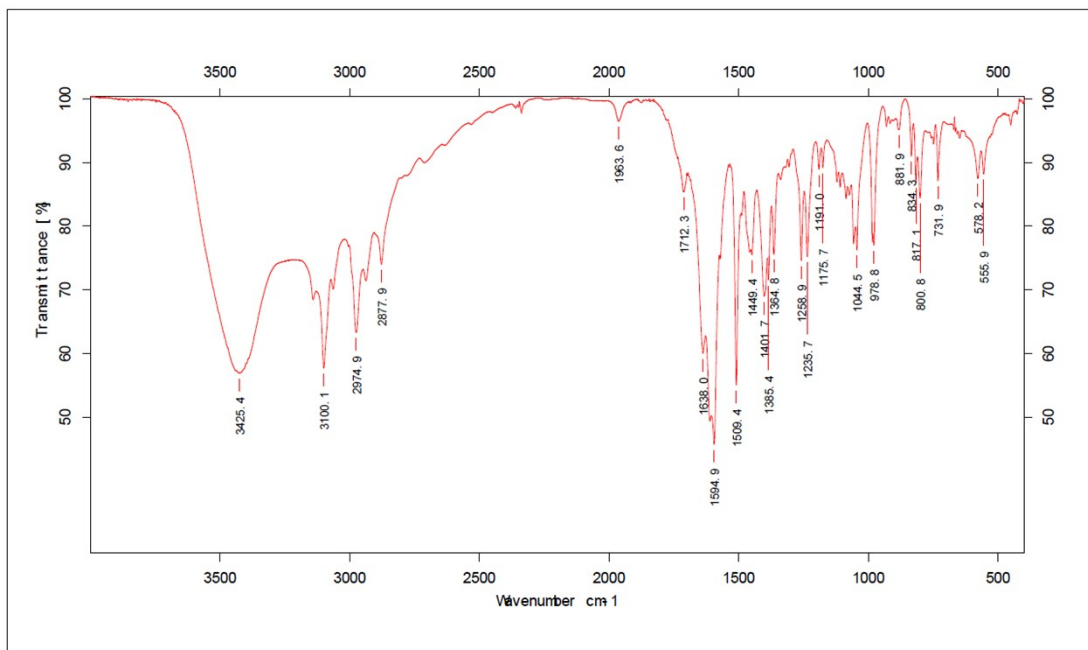

Figure S52. IR spectra of 3o

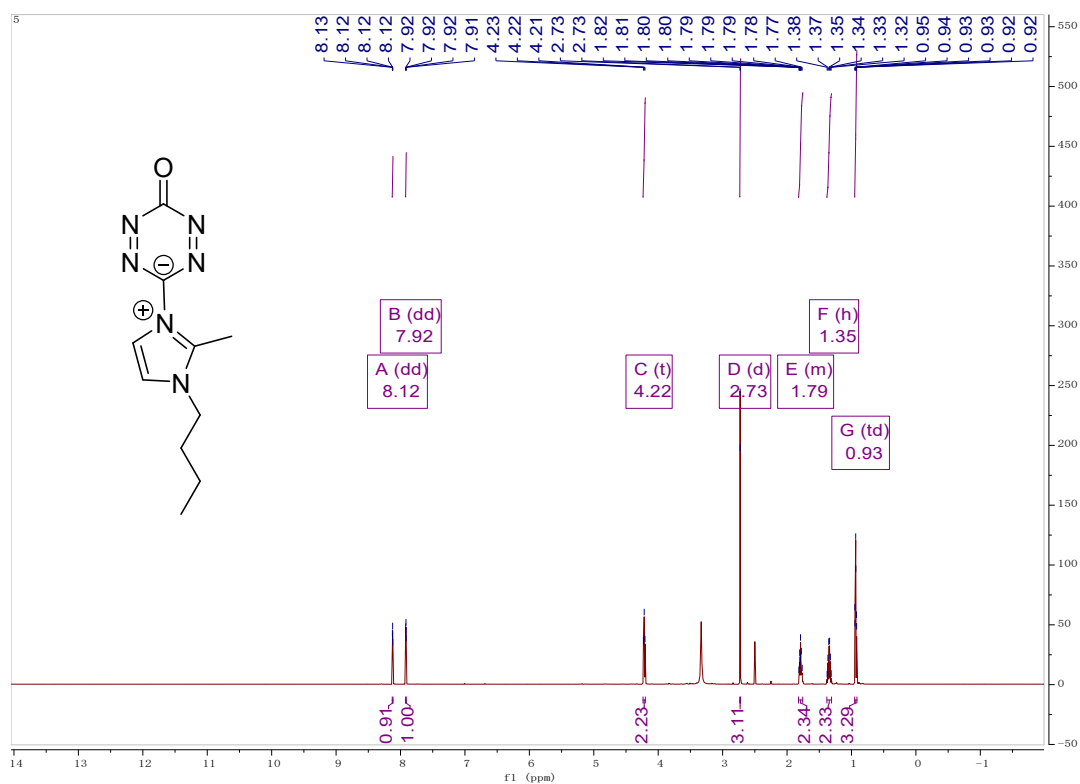

Figure S53.  $^1\text{H-NMR}$  spectra of 3p in  $\text{DMSO-}d_6$

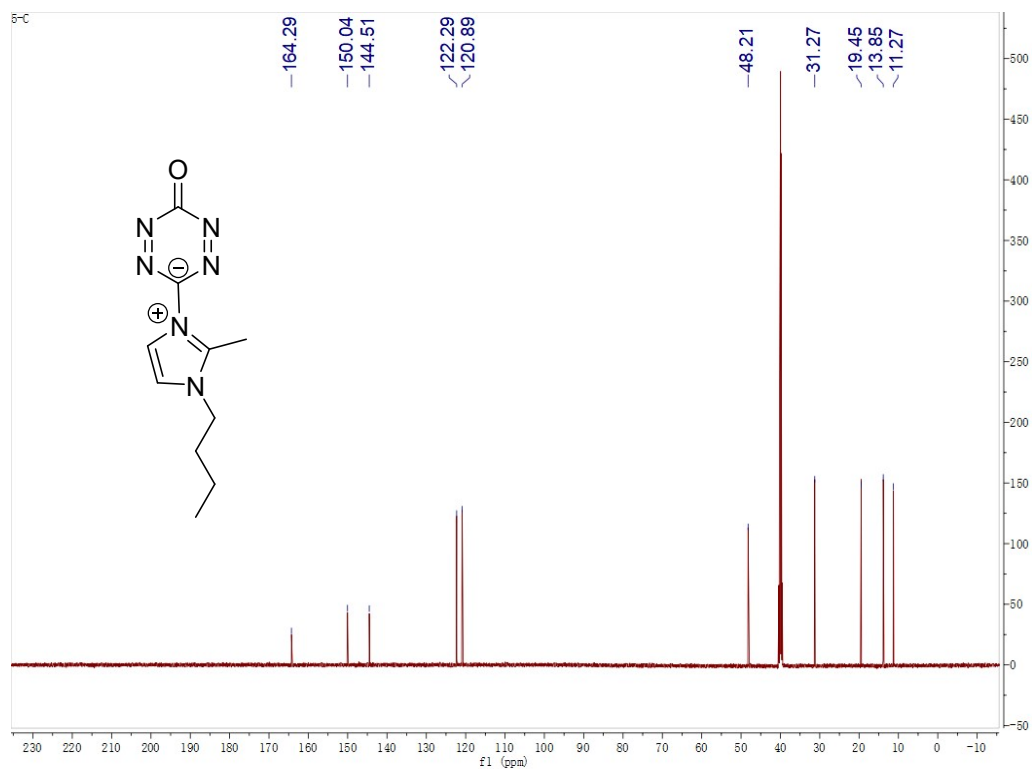

Figure S54.  $^{13}\text{C}$ -NMR spectra of 3p in  $\text{DMSO-}d_6$

5 #231 RT: 2.24 AV: 1 NL: 1.95E10  
 T: FTMS + p ESI Full ms [100.0000-1500.0000]

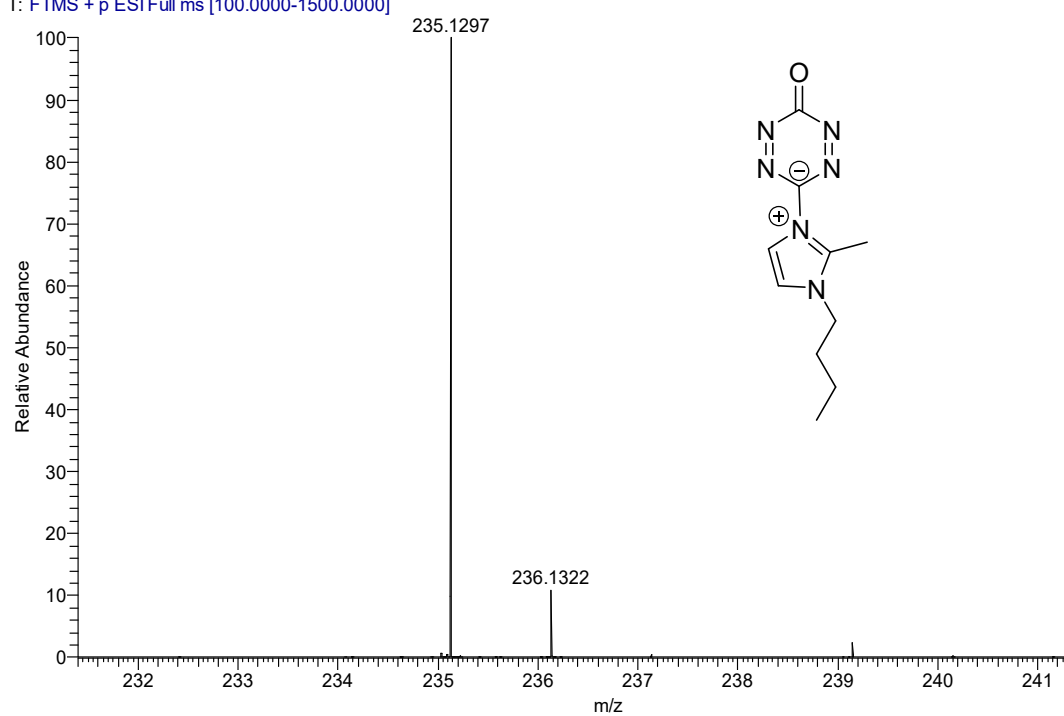

Figure S55. HRMS spectra of 3p in  $\text{DMSO-}d_6$

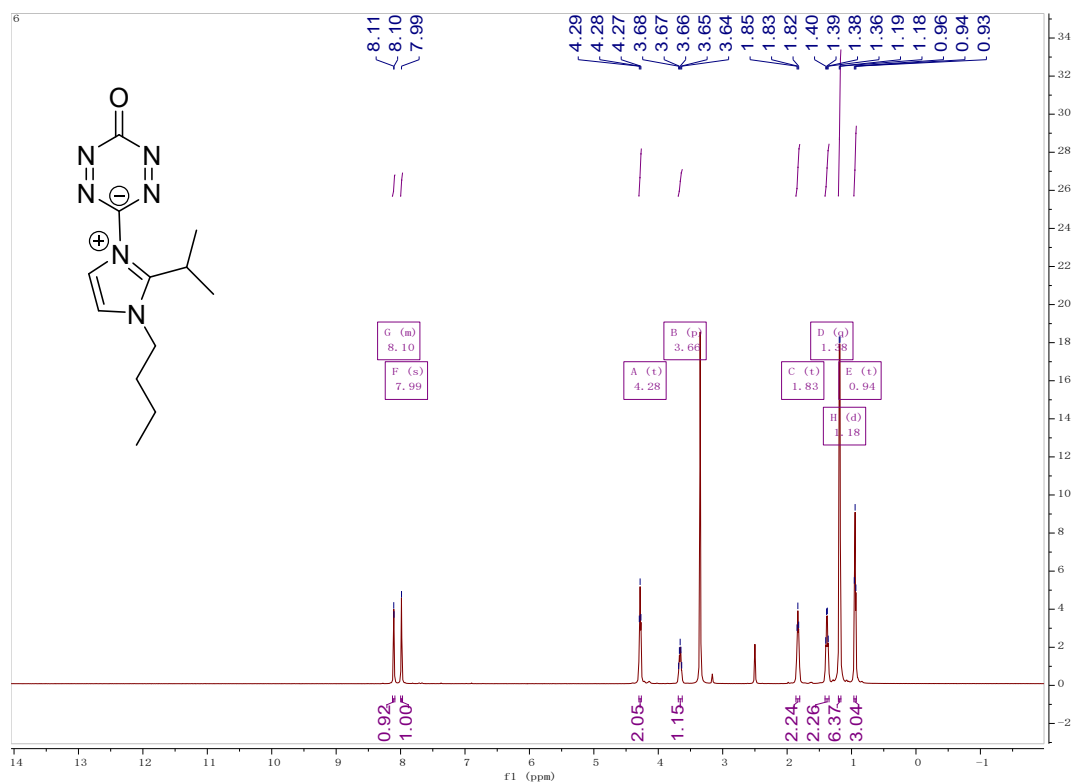

Figure S56.  $^1\text{H-NMR}$  spectra of 3q in  $\text{DMSO-}d_6$

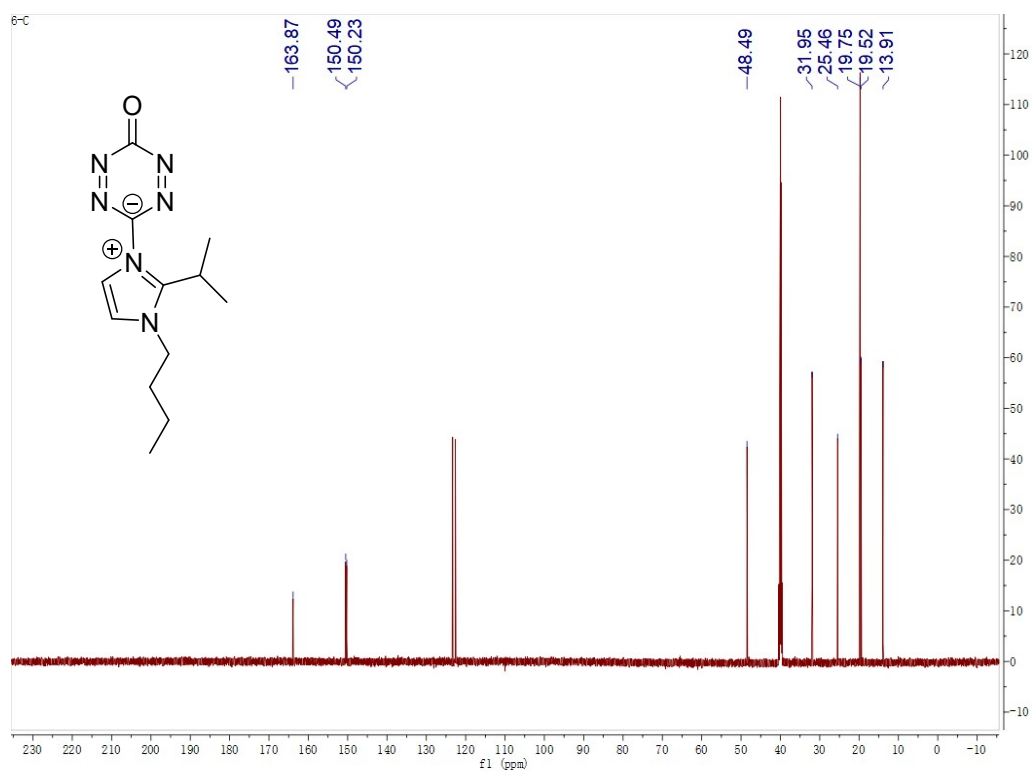

Figure S57.  $^{13}\text{C-NMR}$  spectra of 3q in  $\text{DMSO-}d_6$



6 #275 RT: 2.68 AV: 1 NL: 1.60E10  
T: FTMS + p ESI Full ms [100.0000-1500.0000]

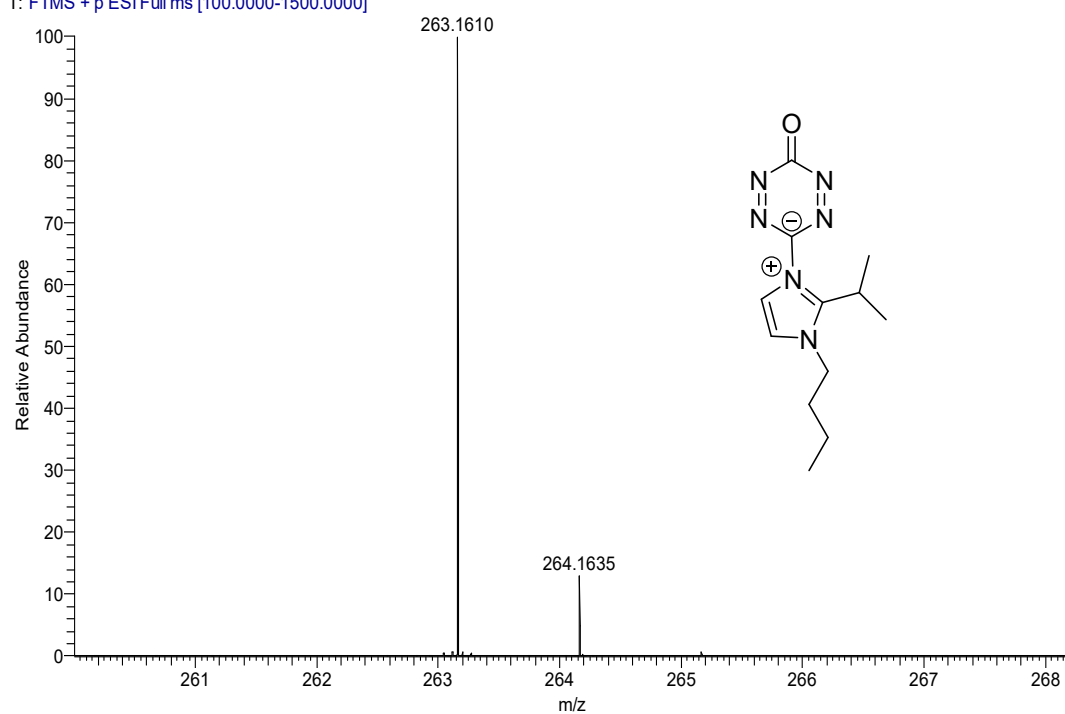

Figure S58. HRMS spectra of 3q in DMSO- $d_6$

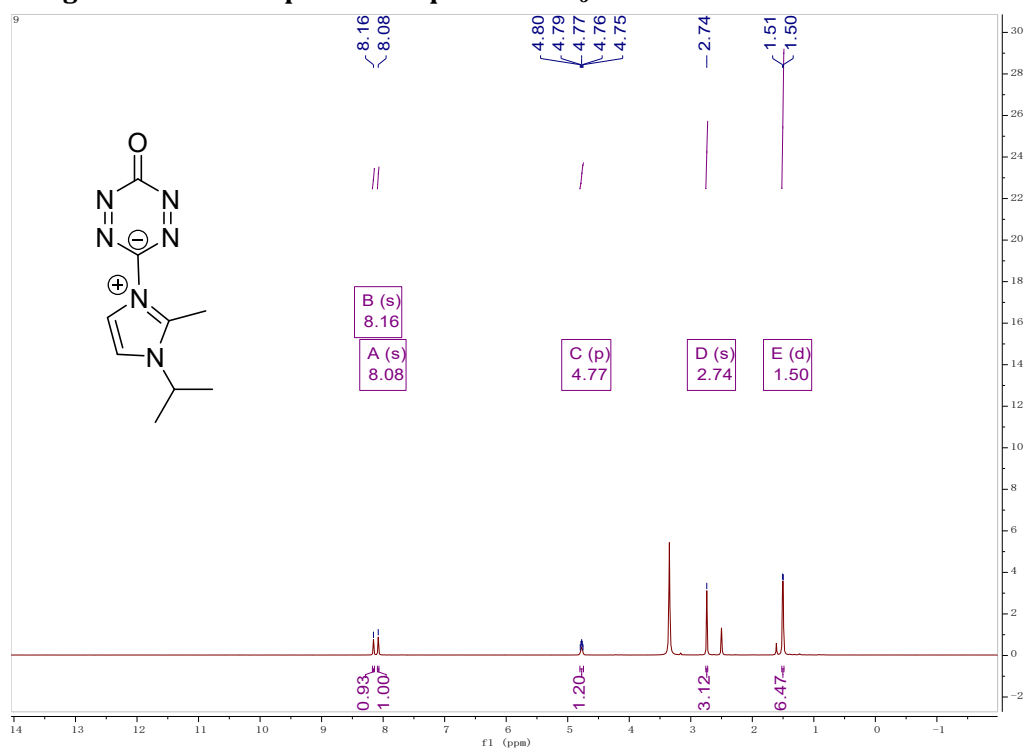

Figure S59.  $^1\text{H-NMR}$  spectra of 3r in DMSO- $d_6$

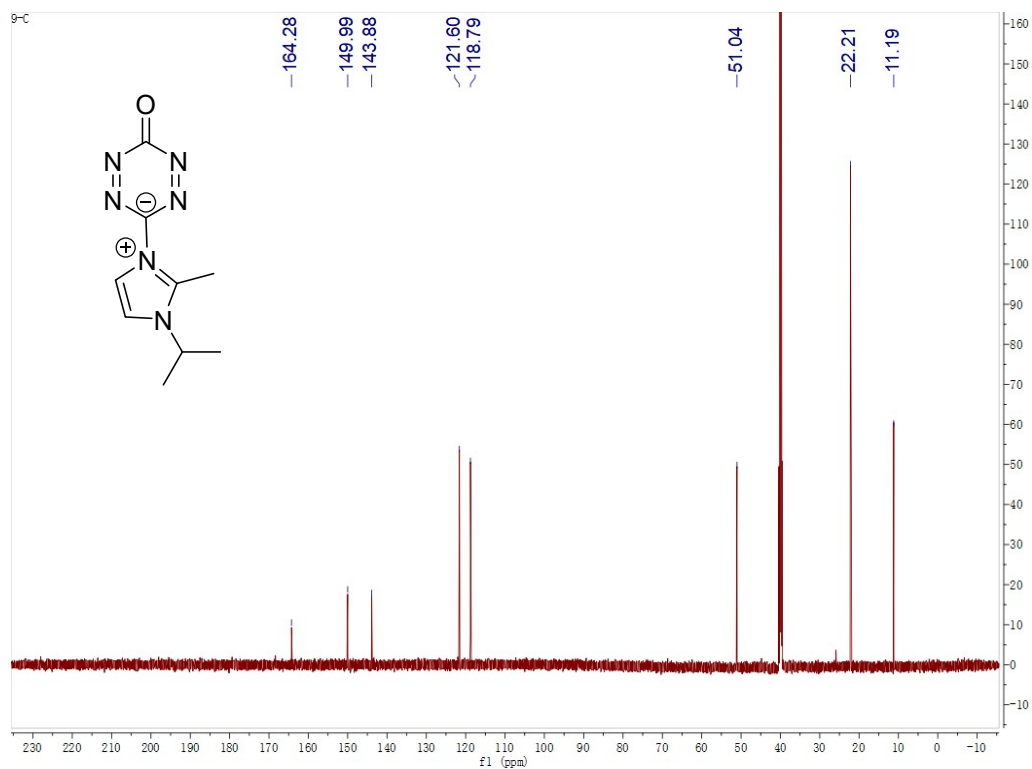

Figure S60.  $^{13}\text{C}$ -NMR spectra of 3r in  $\text{DMSO-}d_6$

9\_191203222224 #131 RT: 1.27 AV: 1 NL: 1.36E9  
 T: FTMS + p ESI Full ms [100.0000-1500.0000]

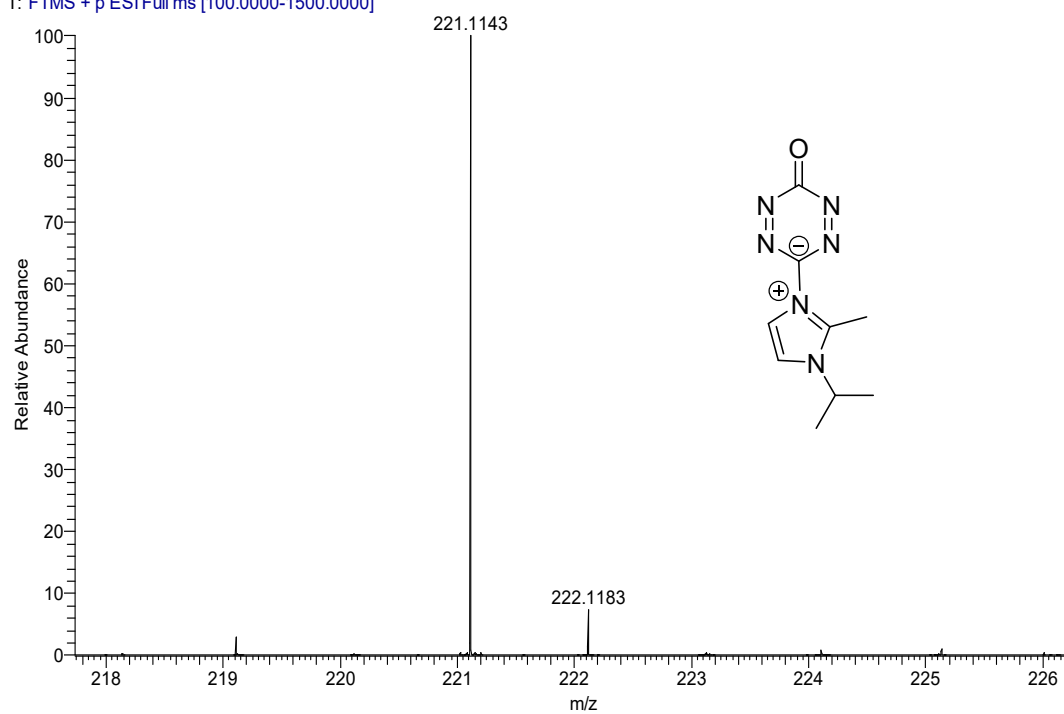

Figure S61. HRMS spectra of 3r in  $\text{DMSO-}d_6$

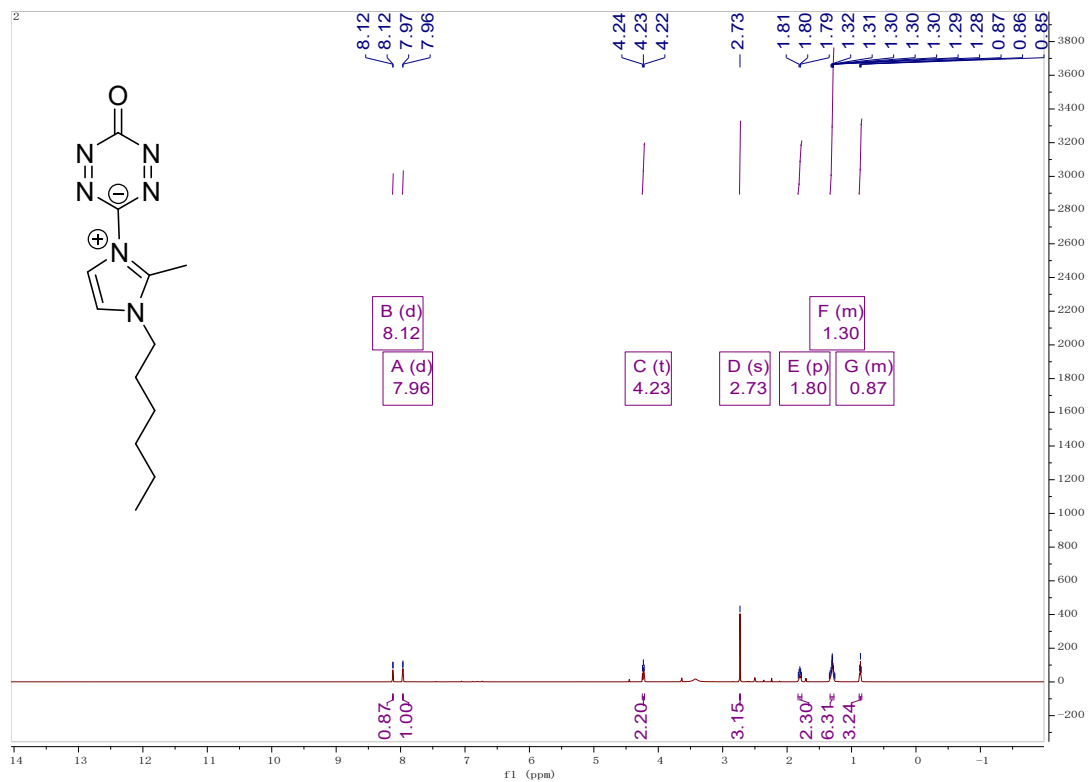

Figure S62.  $^1\text{H}$ -NMR spectra of 3s in  $\text{DMSO-}d_6$

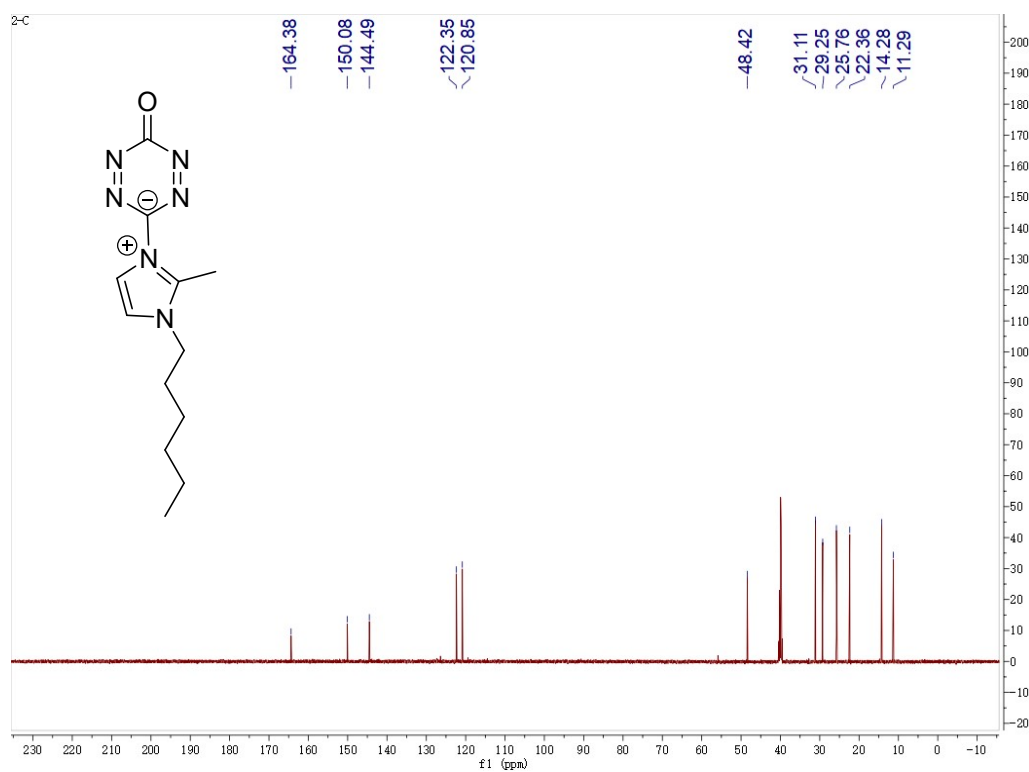

Figure S63.  $^{13}\text{C}$ -NMR spectra of 3s in  $\text{DMSO-}d_6$

2 #315 RT: 3.07 AV: 1 NL: 5.86E8  
T: FTMS + p ESI Full ms [100.0000-1500.0000]

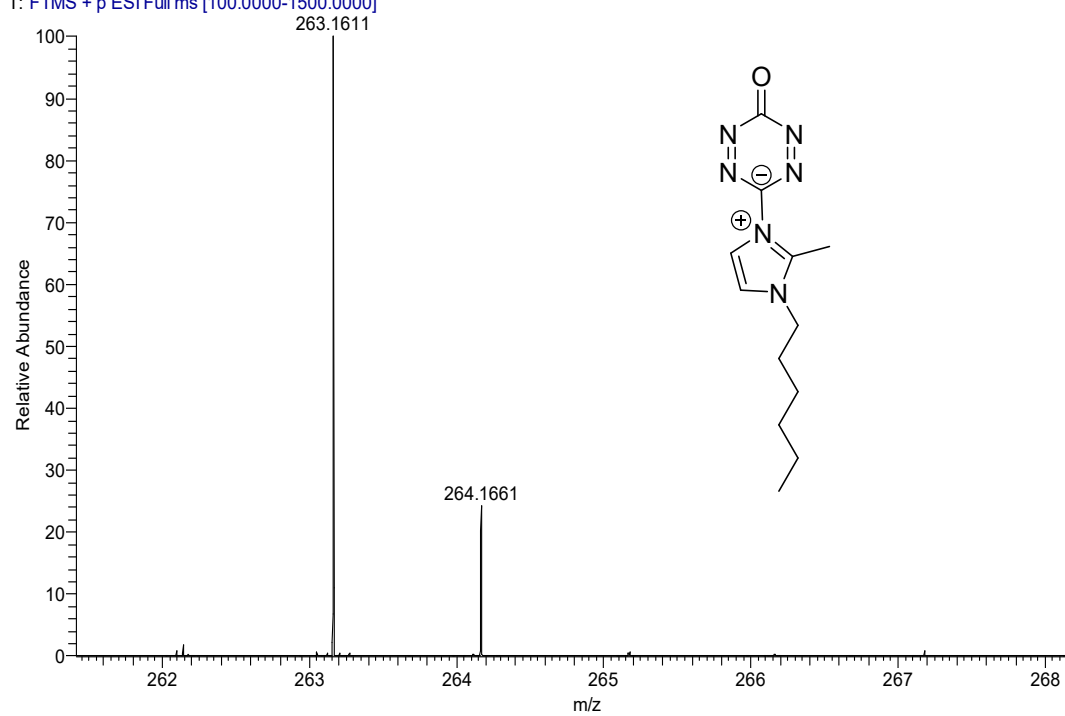

Figure S64. HRMS spectra of 3s in DMSO- $d_6$

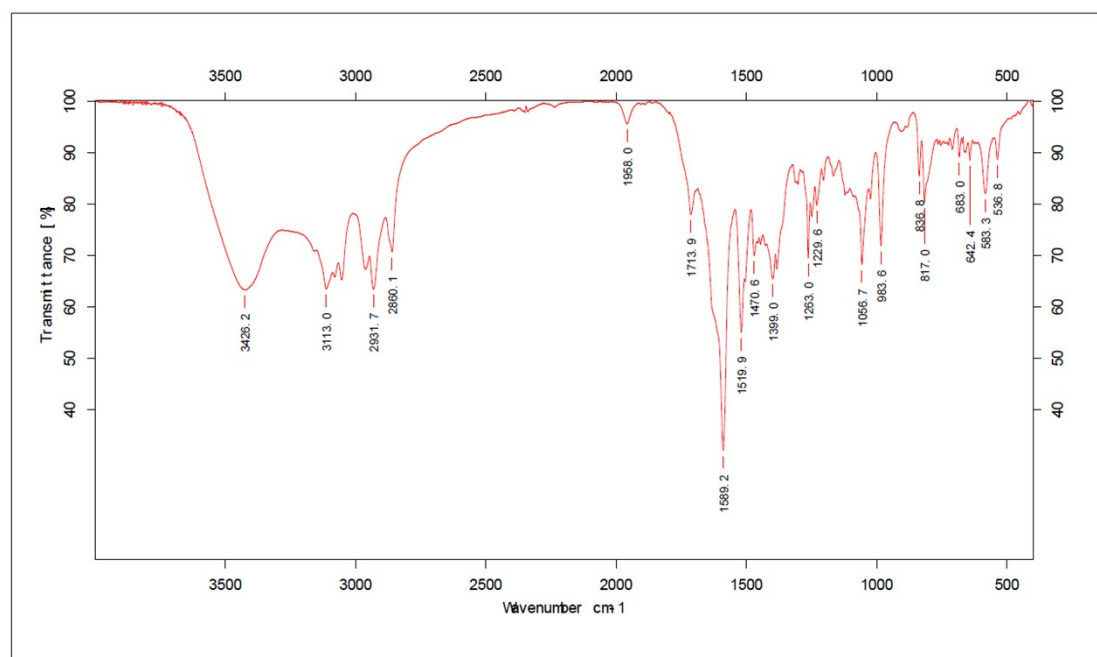

Figure S65. IR spectra of 3s

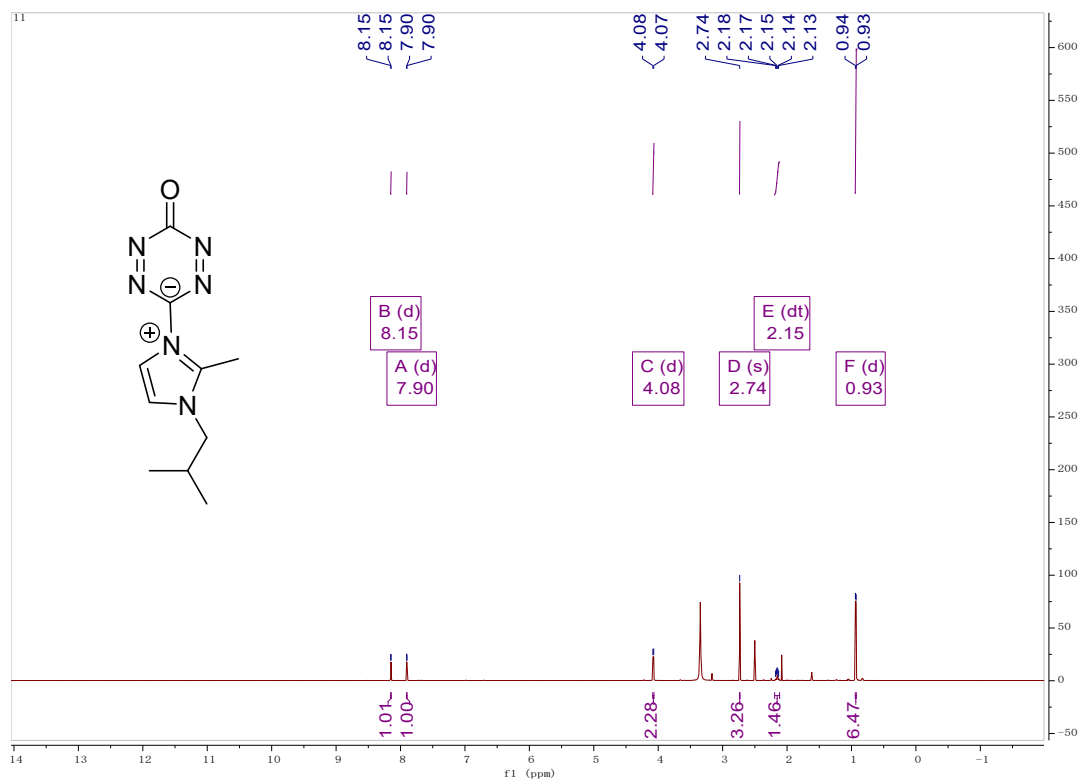

Figure S66.  $^1\text{H-NMR}$  spectra of 3t in  $\text{DMSO-}d_6$

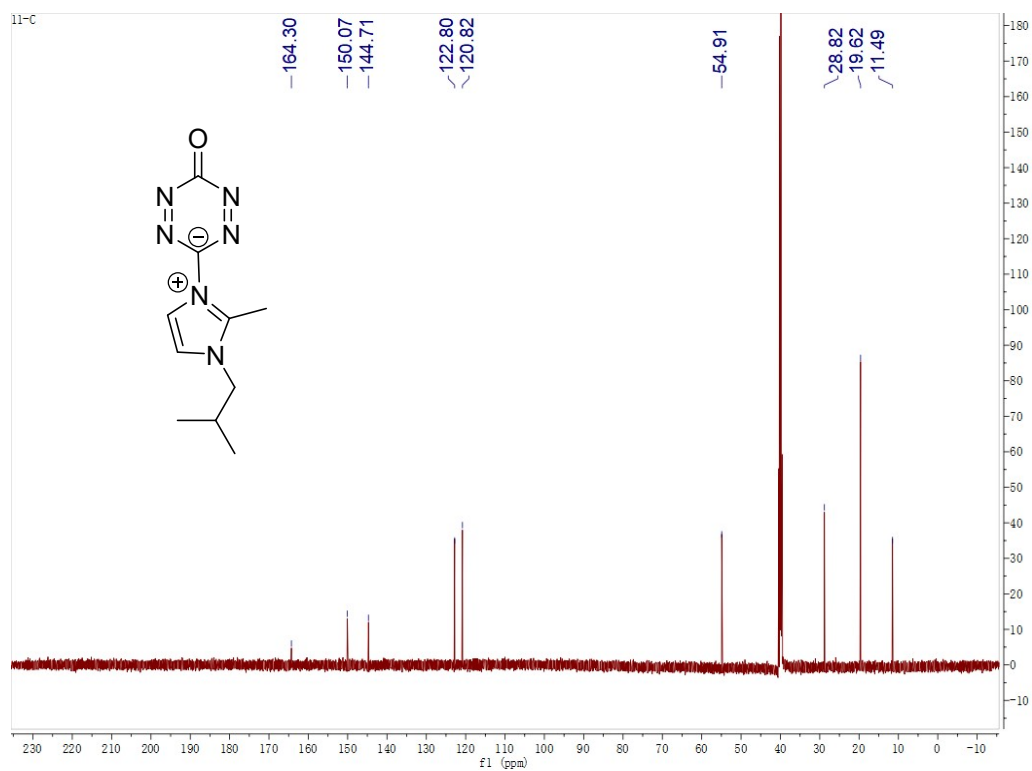

Figure S67.  $^{13}\text{C}$ -NMR spectra of 3t in  $\text{DMSO-}d_6$

11 #229 RT: 2.23 AV: 1 NL: 1.17E10  
T: FTMS + p ESI Full ms [100.0000-1500.0000]

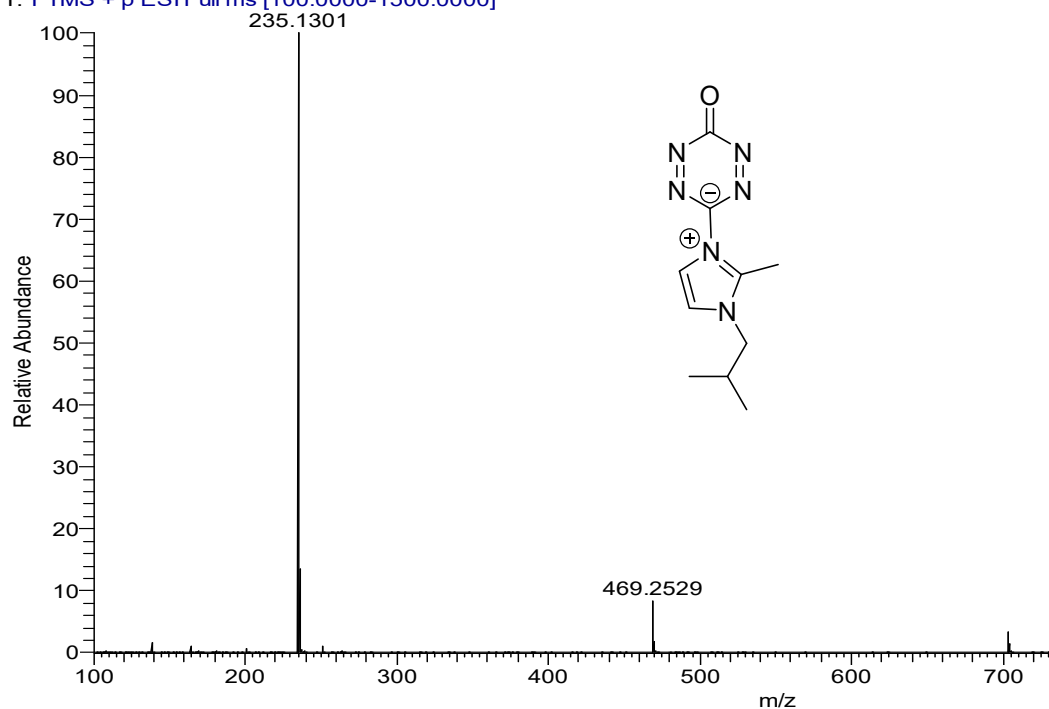

Figure S68. HRMS spectra of 3t in  $\text{DMSO-}d_6$

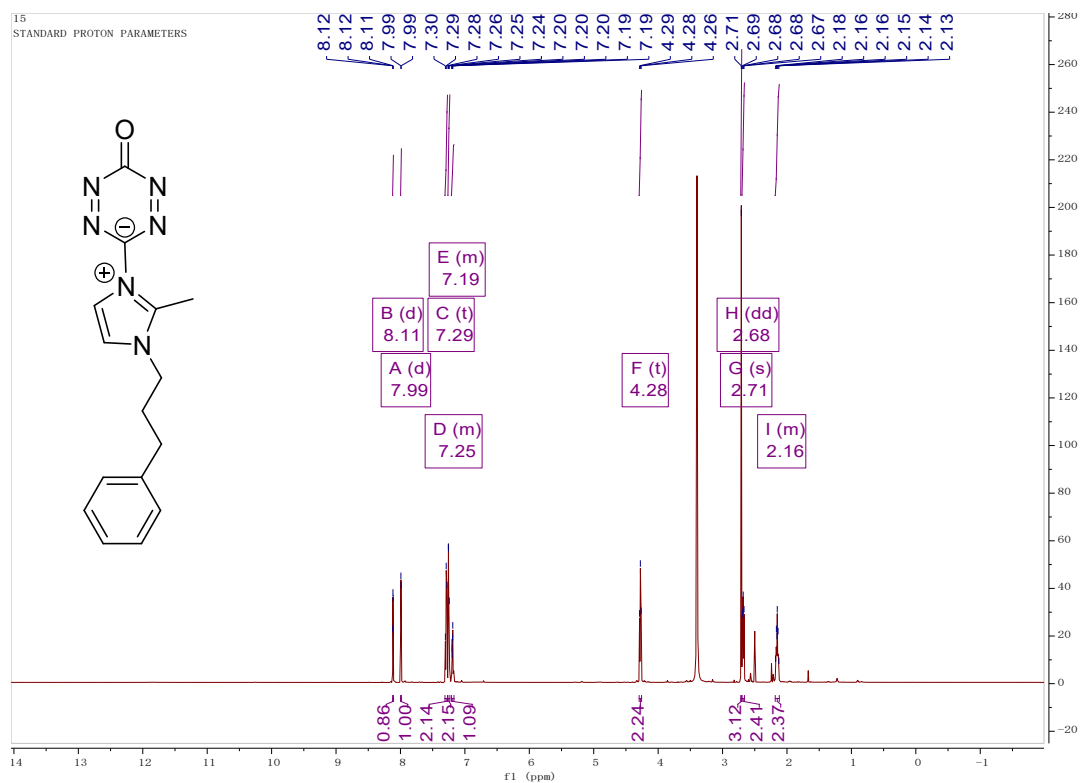

Figure S69.  $^1\text{H}$ -NMR spectra of 3u in  $\text{DMSO-}d_6$

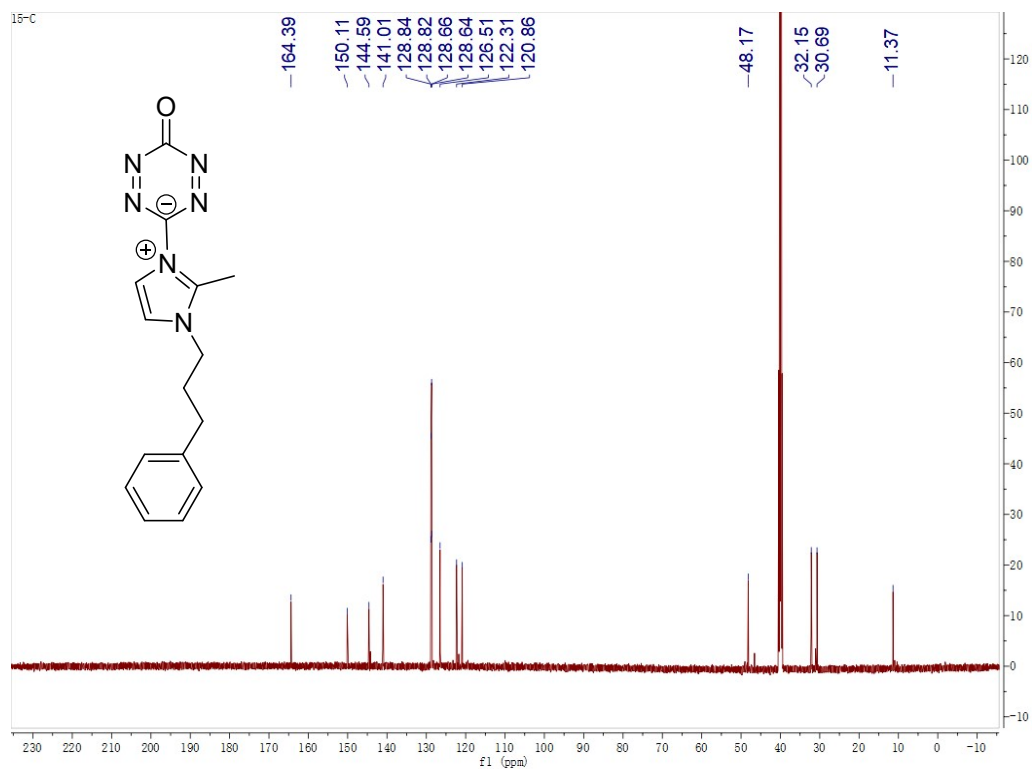

Figure S70. <sup>13</sup>C-NMR spectra of 3u in DMSO-*d*<sub>6</sub>

15 #294 RT: 2.86 AV: 1 NL: 1.30E9  
T: FTMS - p ESI Full ms [100.0000-1500.0000]

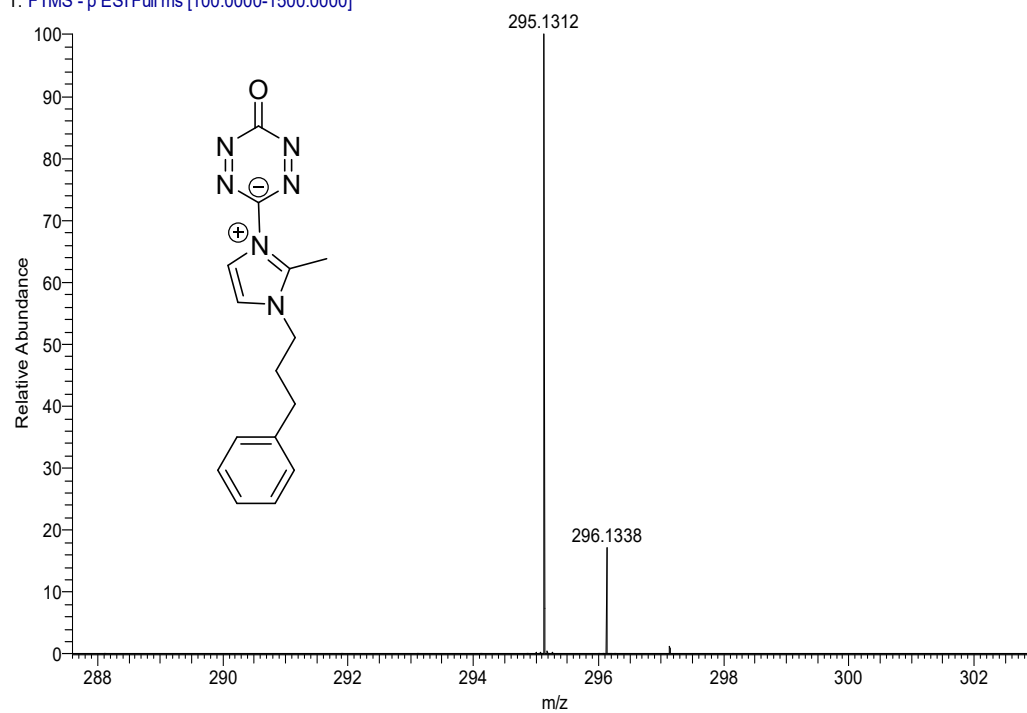

Figure S71. HRMS spectra of 3u in DMSO-*d*<sub>6</sub>

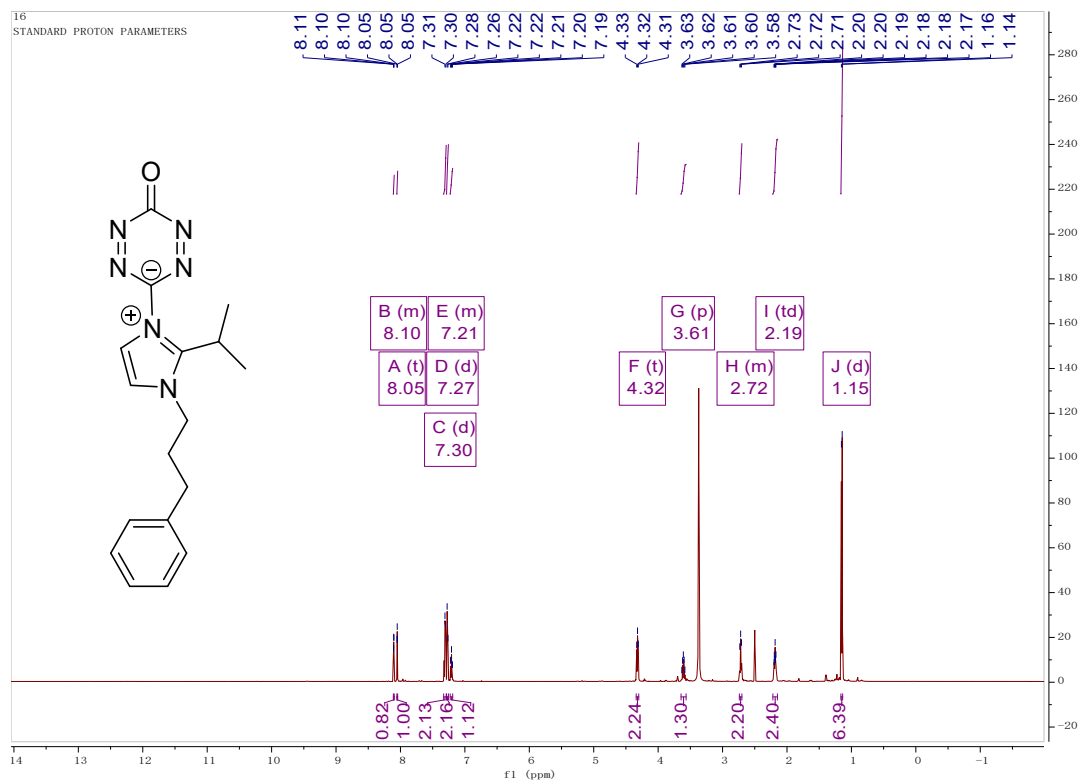

Figure S72.  $^1\text{H}$ -NMR spectra of 3v in  $\text{DMSO-}d_6$

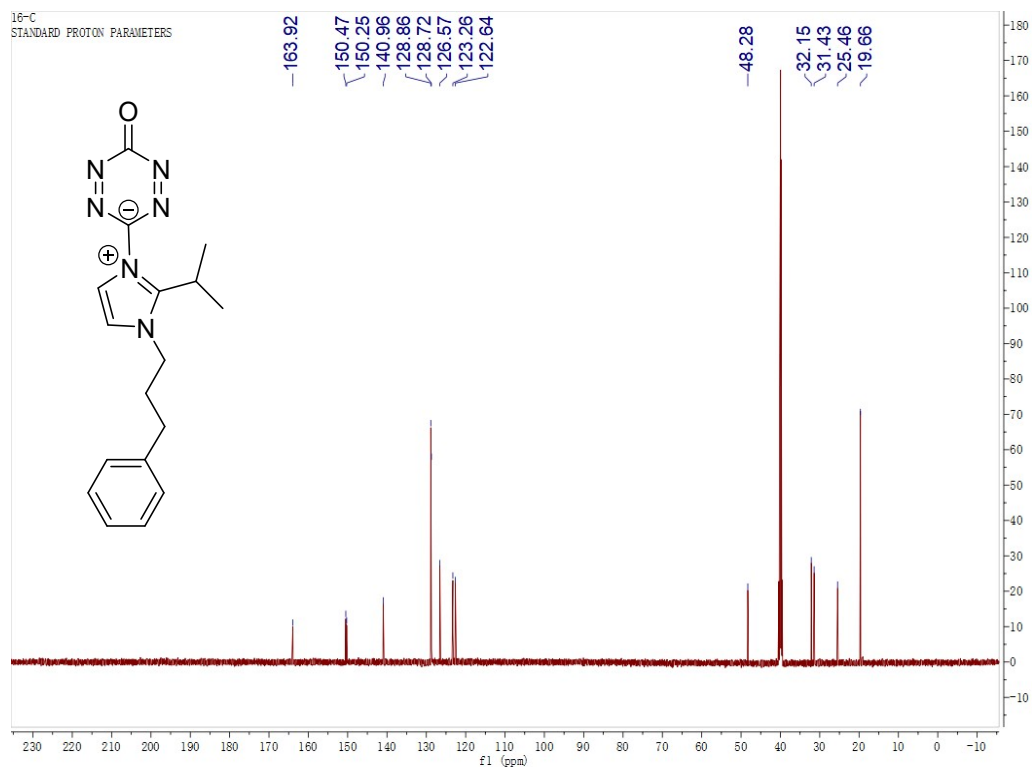

Figure S73.  $^{13}\text{C}$ -NMR spectra of 3v in  $\text{DMSO-}d_6$



16 #324 RT: 3.15 AV: 1 NL: 1.33E8  
T: FTMS - p ESI Full ms [100.0000-1500.0000]

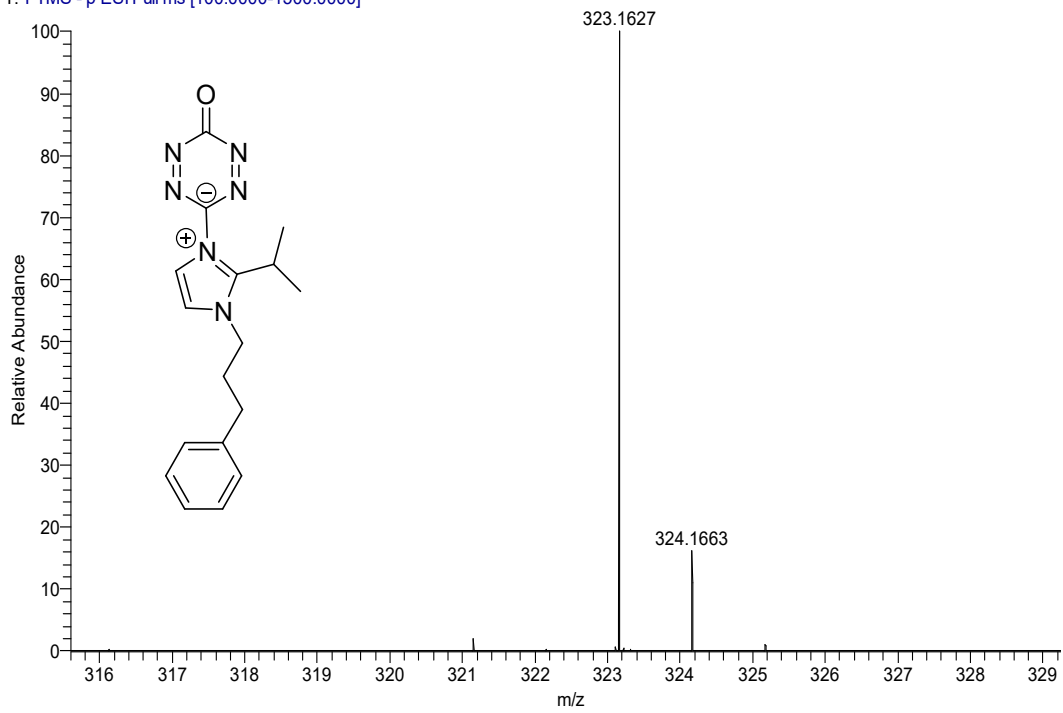

Figure S74. HRMS spectra of 3v in DMSO-d<sub>6</sub>

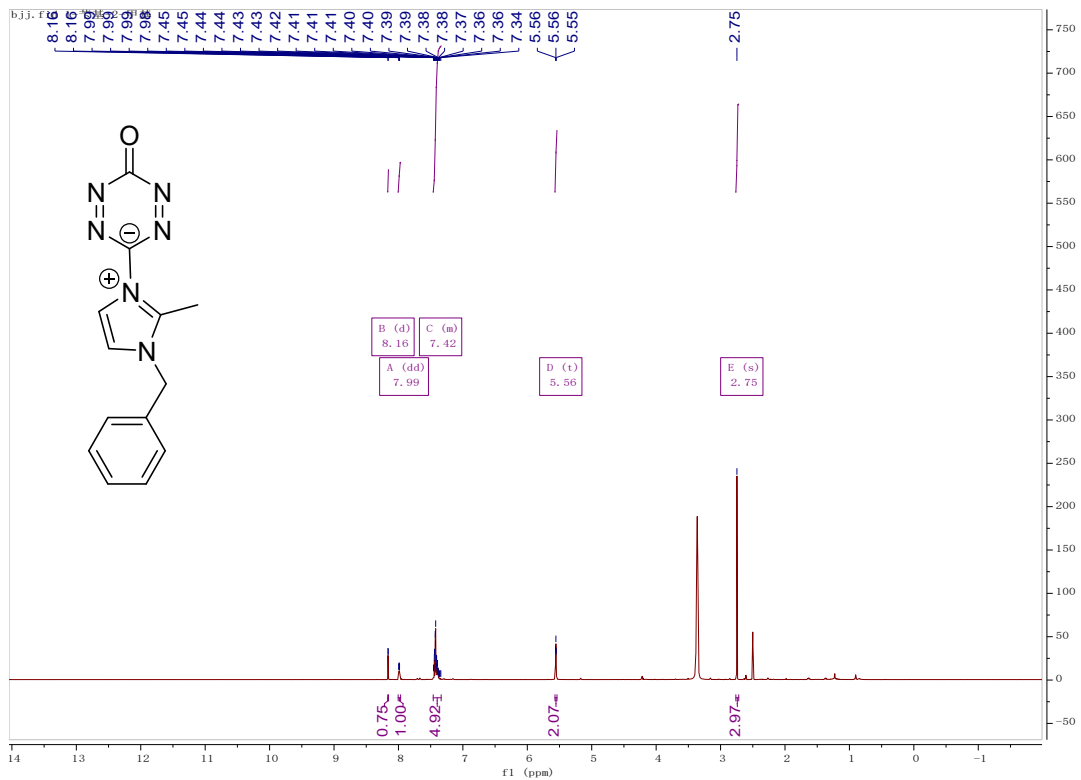

Figure S75. <sup>1</sup>H-NMR spectra of 3w in DMSO-d<sub>6</sub>

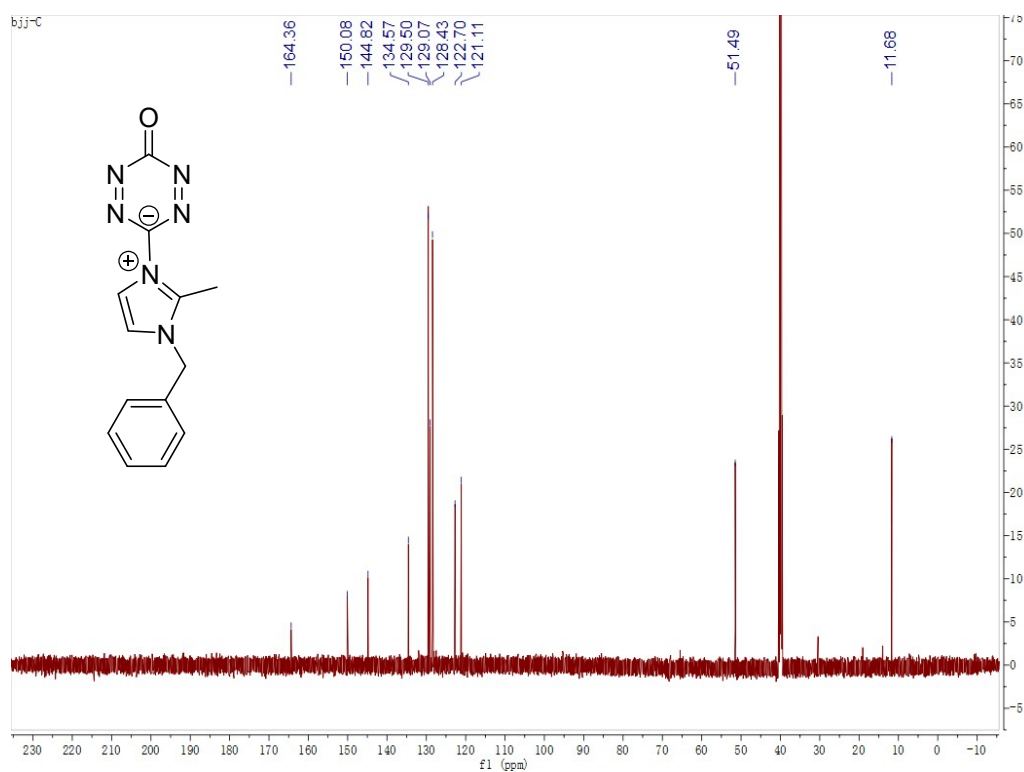

Figure S76.  $^{13}\text{C-NMR}$  spectra of 3w in  $\text{DMSO-}d_6$

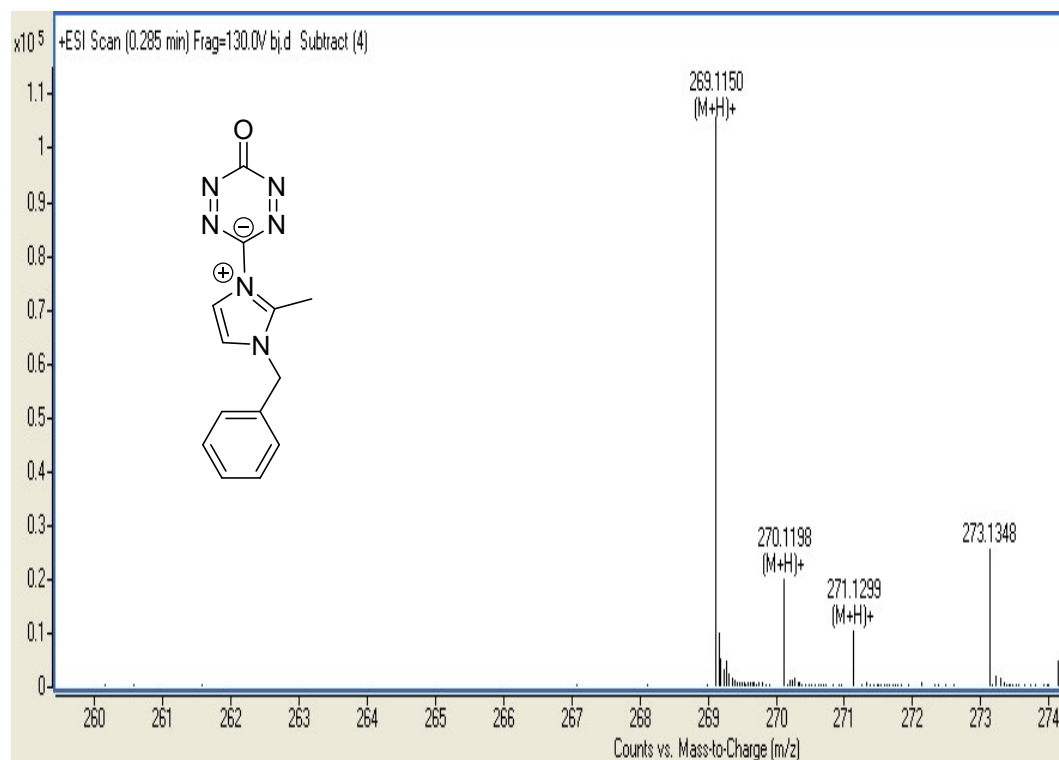

Figure S77. HRMS spectra of 3w in  $\text{DMSO-}d_6$

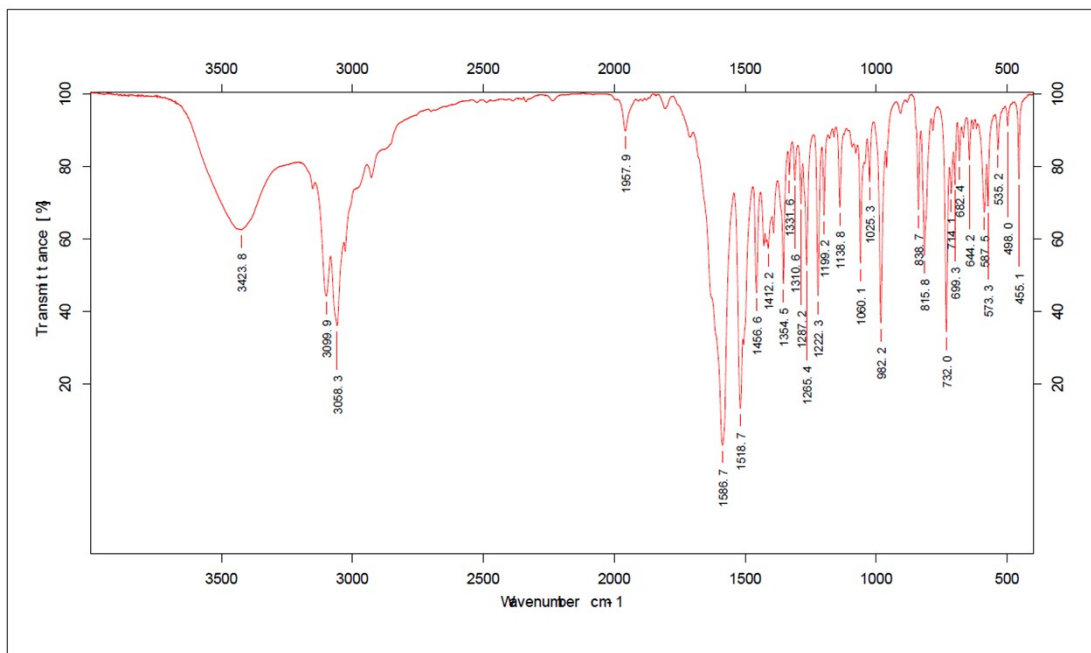

Figure S78. IR spectra of 3w

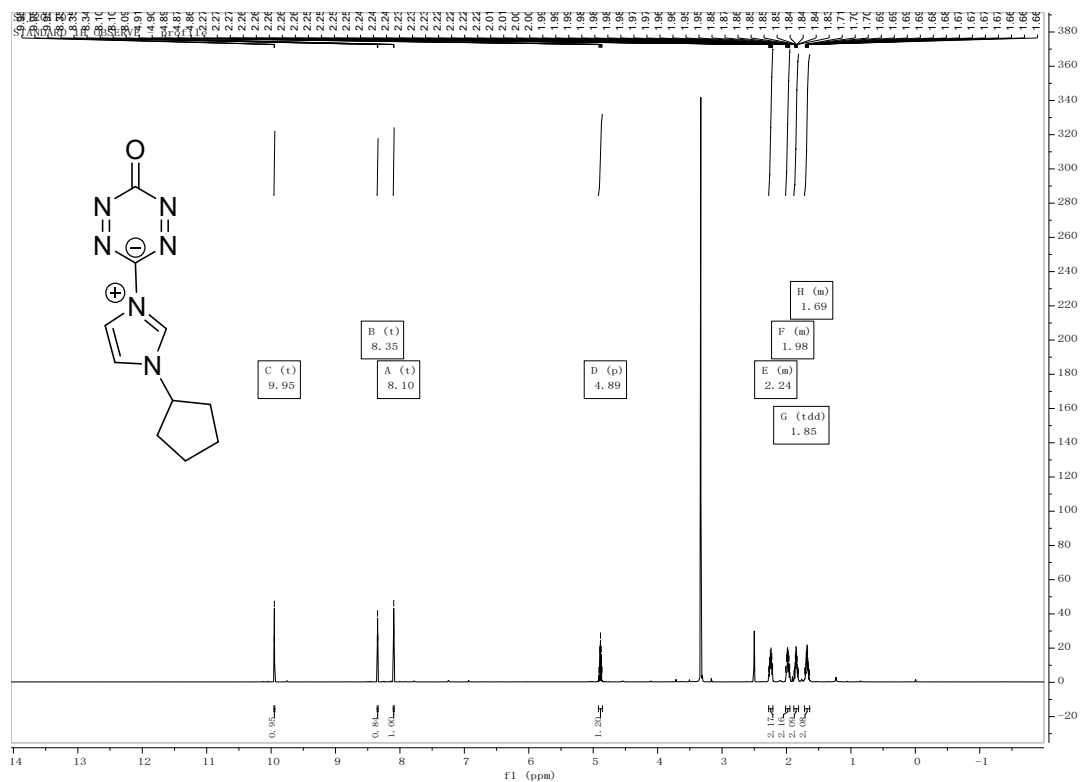

Figure S79. <sup>1</sup>H-NMR spectra of 3x in DMSO-d<sub>6</sub>

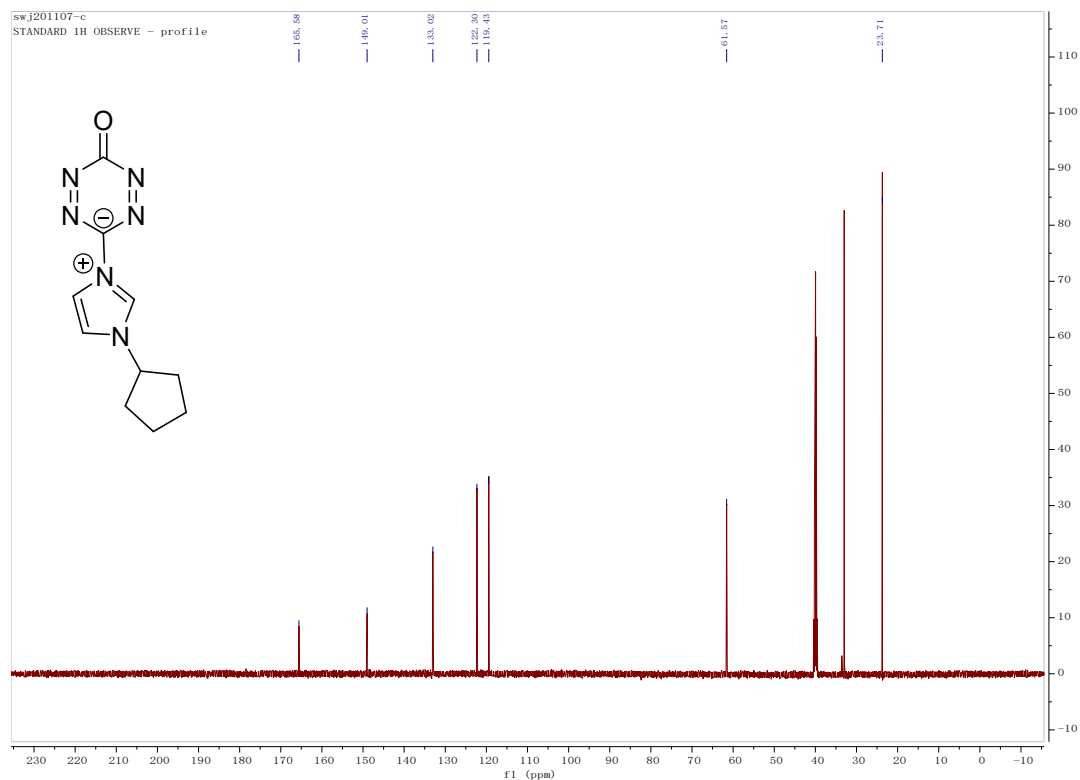

Figure S80.  $^{13}\text{C}$ -NMR spectra of 3x in  $\text{DMSO-}d_6$

1\_201224133149 #17 RT: 0.23 AV: 1 NL: 1.64E6  
T: FTMS + p ESI Full ms [200.0000-2500.0000]

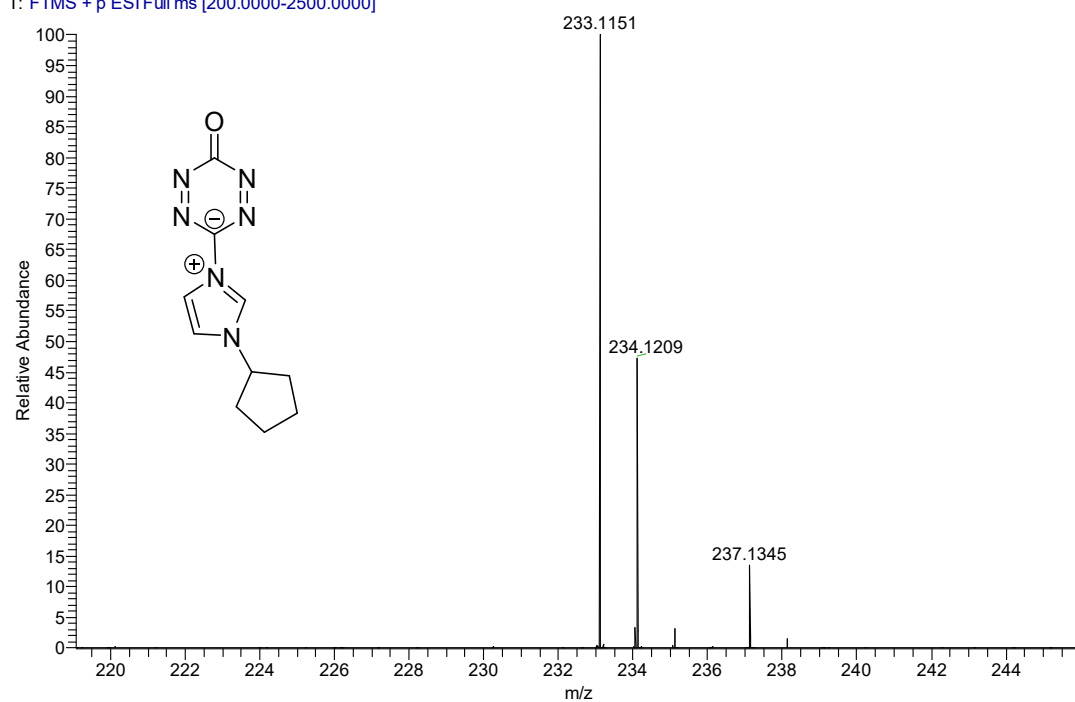

Figure S81. HRMS spectra of 3x in  $\text{DMSO-}d_6$

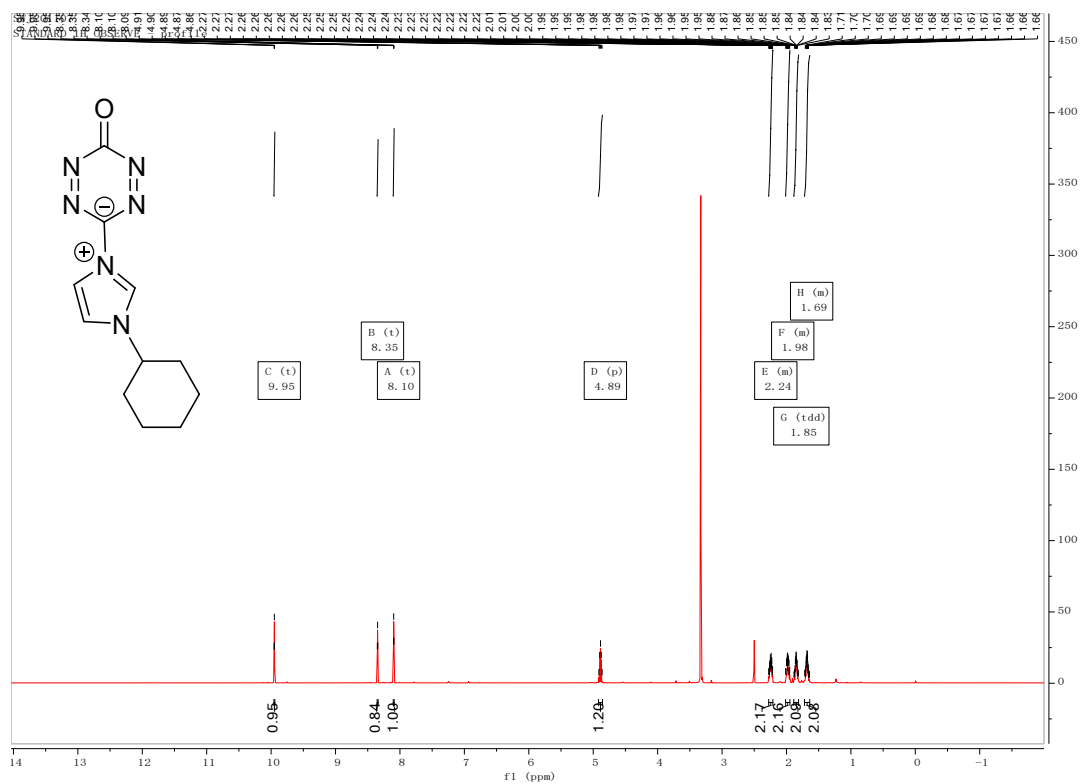

Figure S82.  $^1\text{H-NMR}$  spectra of 3y in  $\text{DMSO-}d_6$

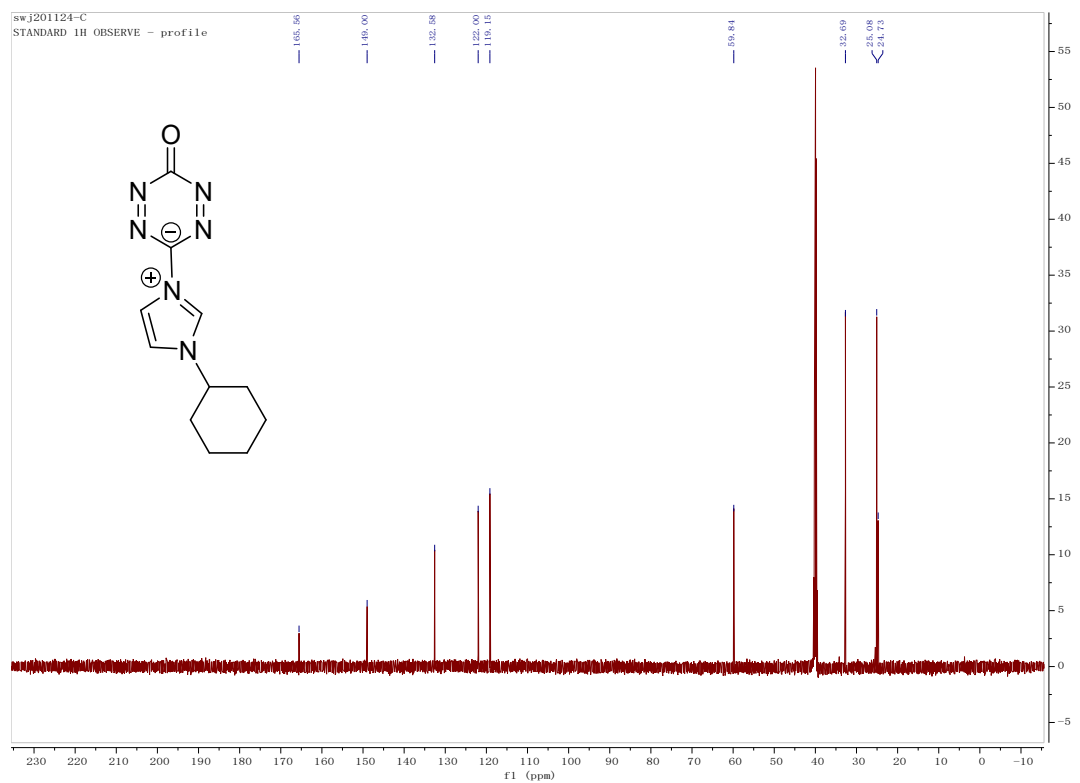

Figure S83.  $^{13}\text{C-NMR}$  spectra of 3y in  $\text{DMSO-}d_6$

WJC-2 #25 RT: 0.25 AV: 1 NL: 1.95E7  
T: FTMS + p ESI Full ms [200.0000-2500.0000]

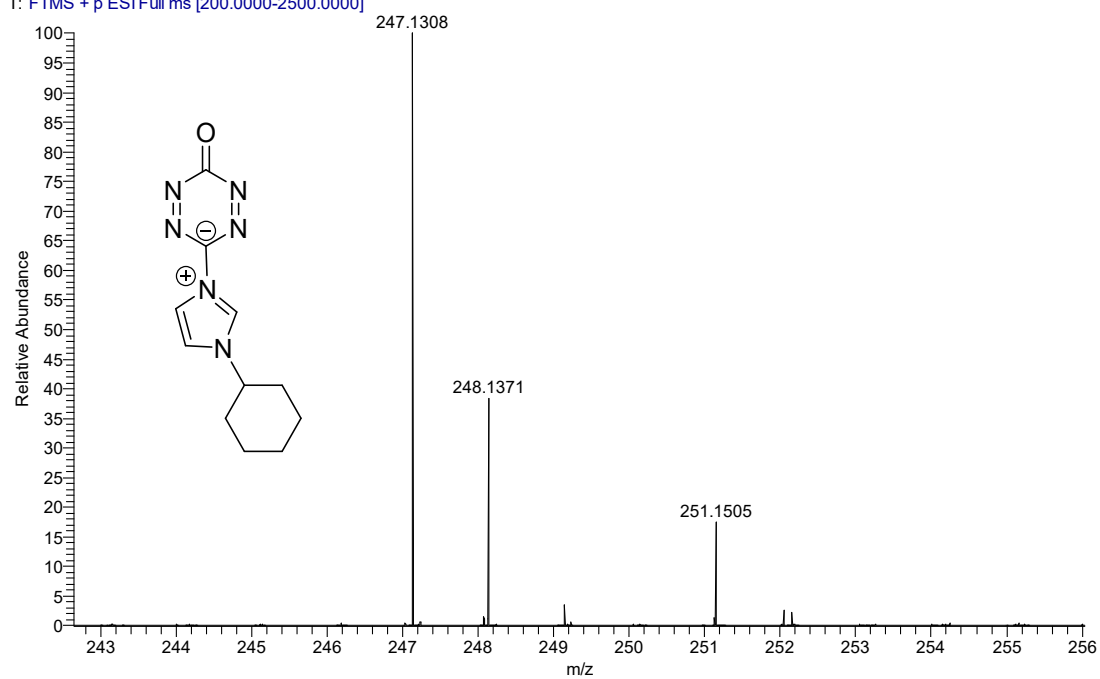

Figure S84. HRMS spectra of 3y in DMSO- $d_6$

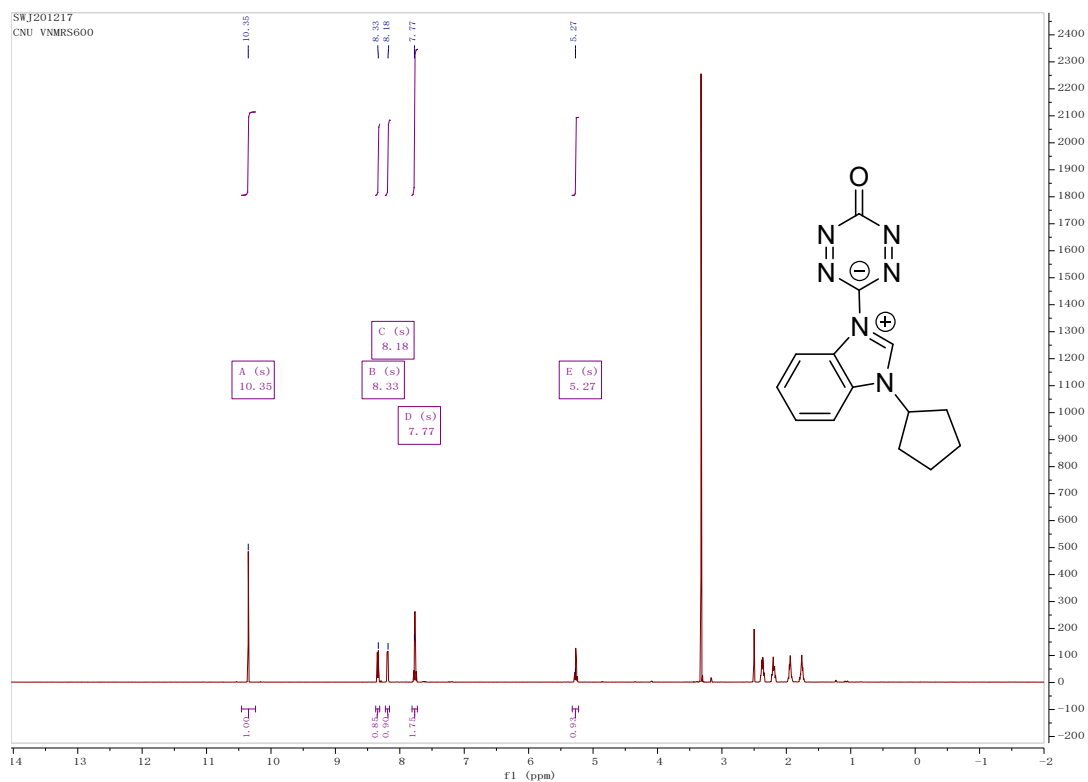

Figure S85.  $^1\text{H-NMR}$  spectra of 3z in DMSO- $d_6$

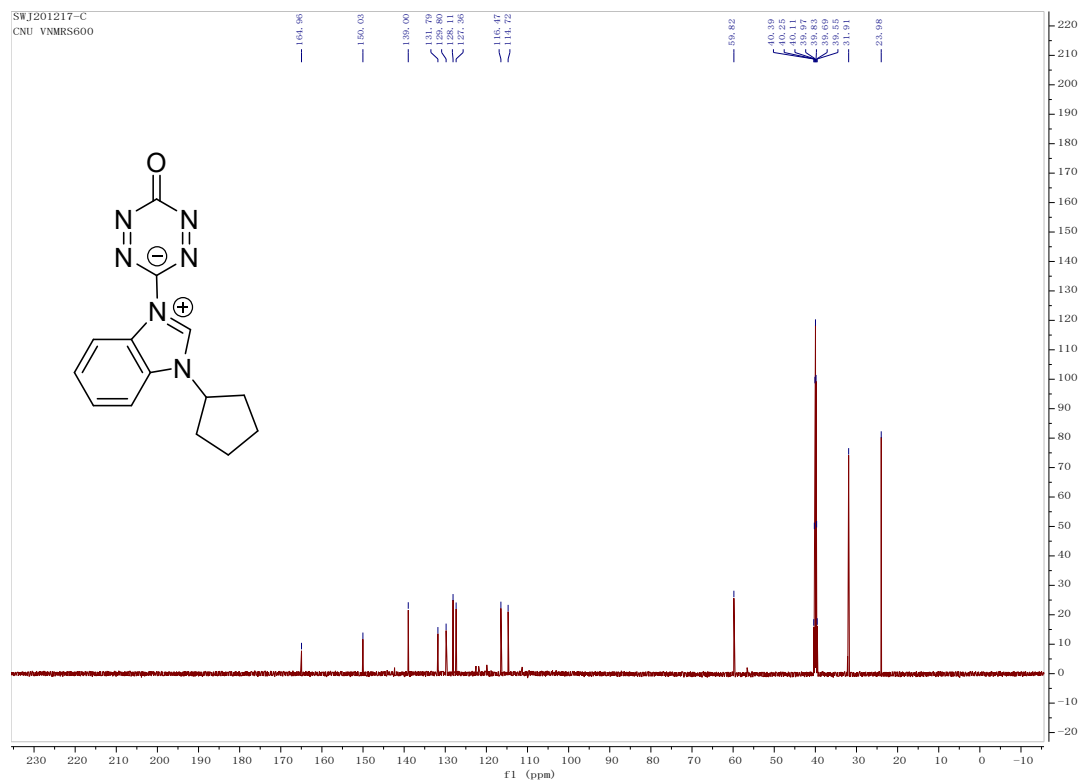

Figure S86.  $^{13}\text{C}$ -NMR spectra of 3z in  $\text{DMSO-}d_6$

9 (2) #17 RT: 0.23 AV: 1 NL: 3.77E6  
T: FTMS + p ESI Full ms [200.0000-2500.0000]

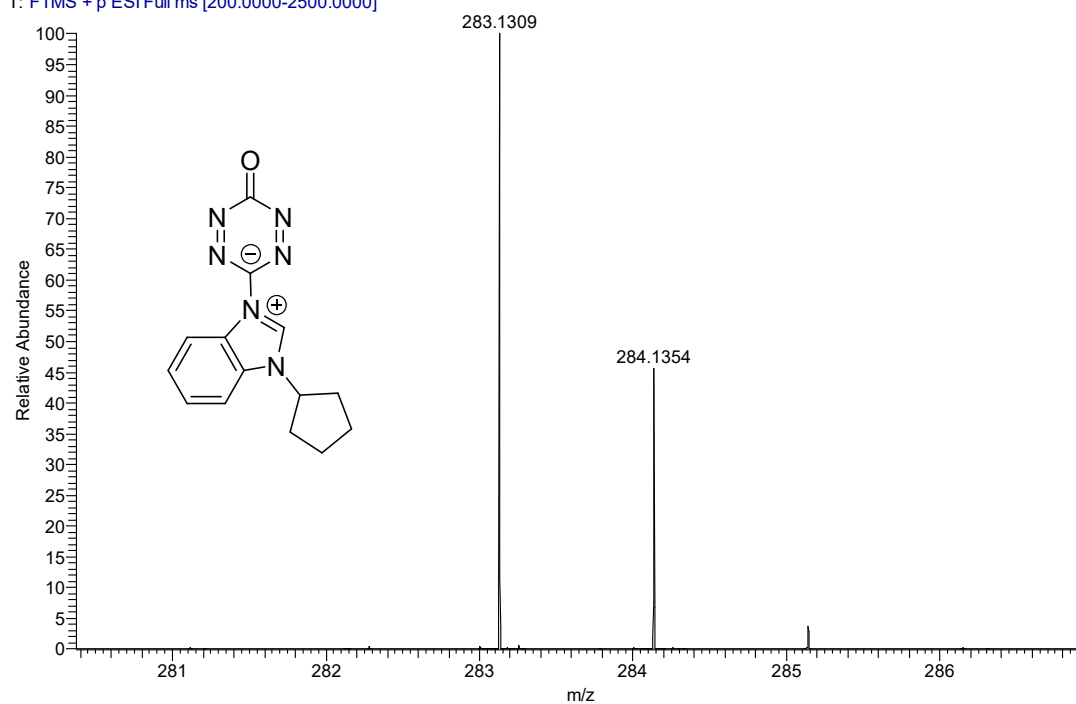

Figure S87. HRMS spectra of 3z in  $\text{DMSO-}d_6$

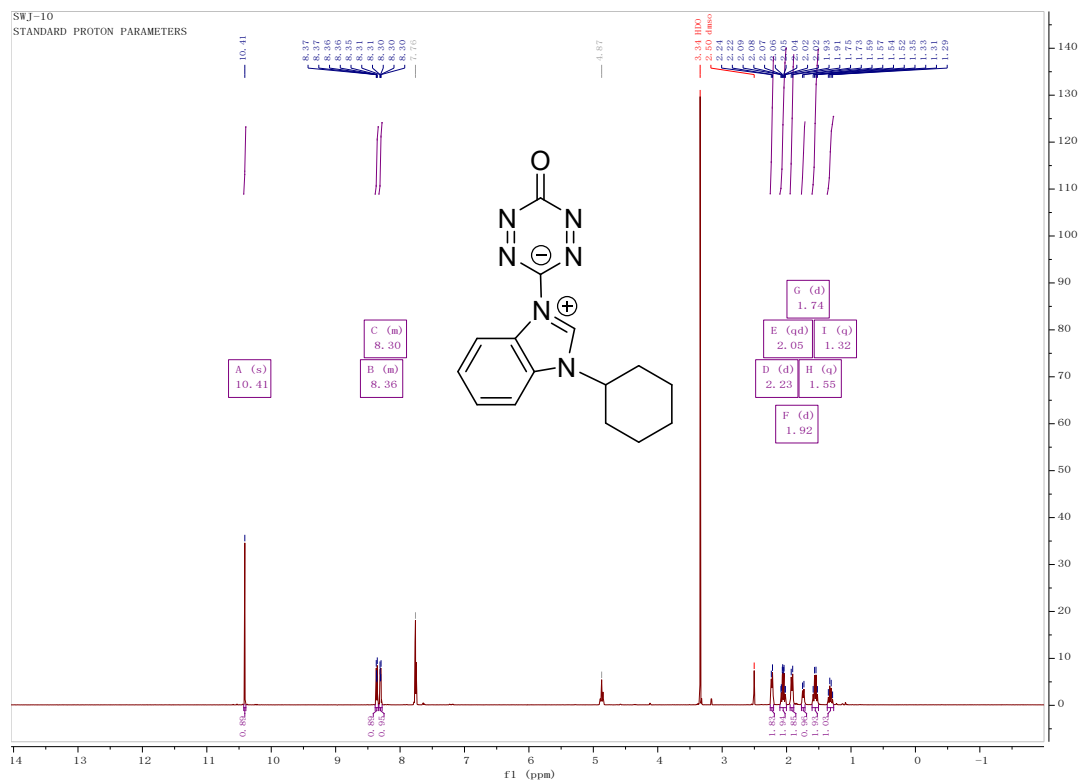

Figure S88.  $^1\text{H-NMR}$  spectra of 3aa in  $\text{DMSO-}d_6$

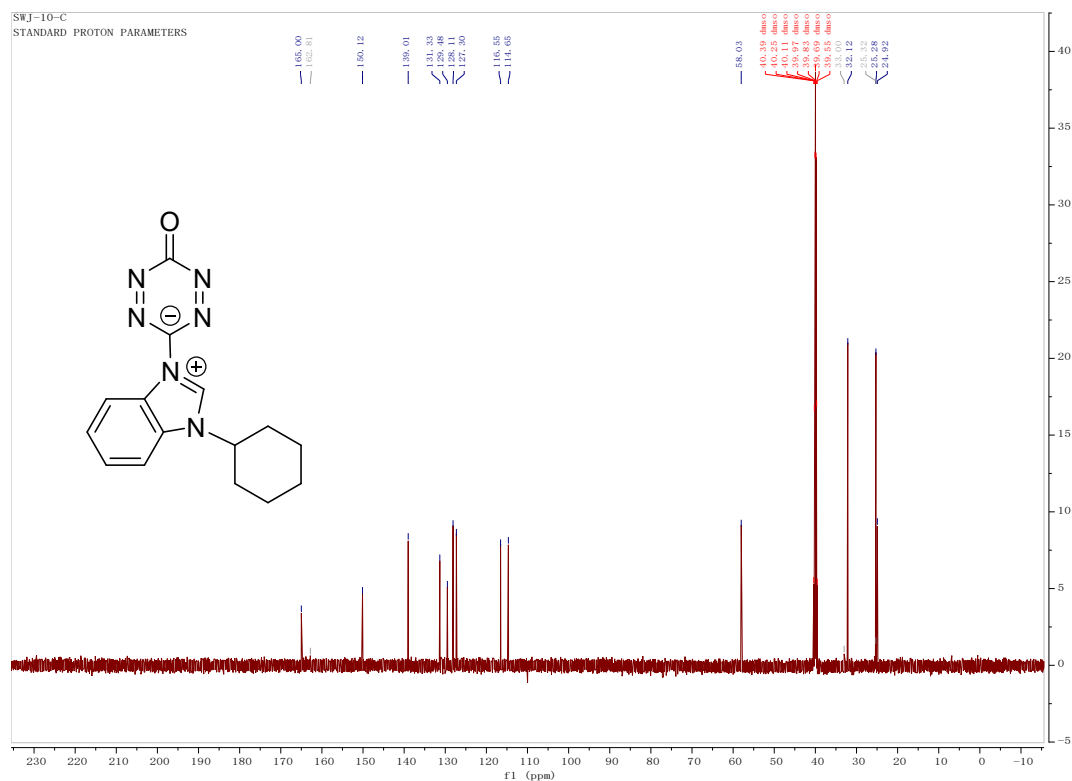

Figure S89.  $^{13}\text{C-NMR}$  spectra of 3aa in  $\text{DMSO-}d_6$



CUN-10\_210122110913 #21 RT: 0.21 AV: 1 SB: 1 0.09 NL: 1.45E8  
T: FTMS + p ESI Full ms [200.0000-2500.0000]

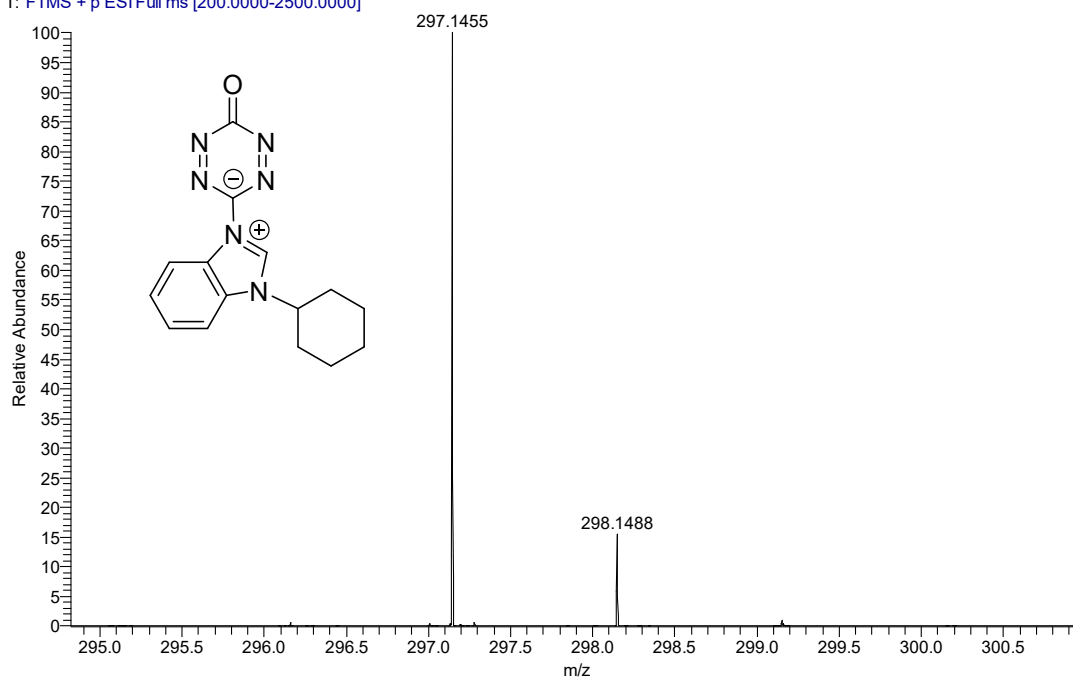

Figure S90. HRMS spectra of 3aa in DMSO- $d_6$

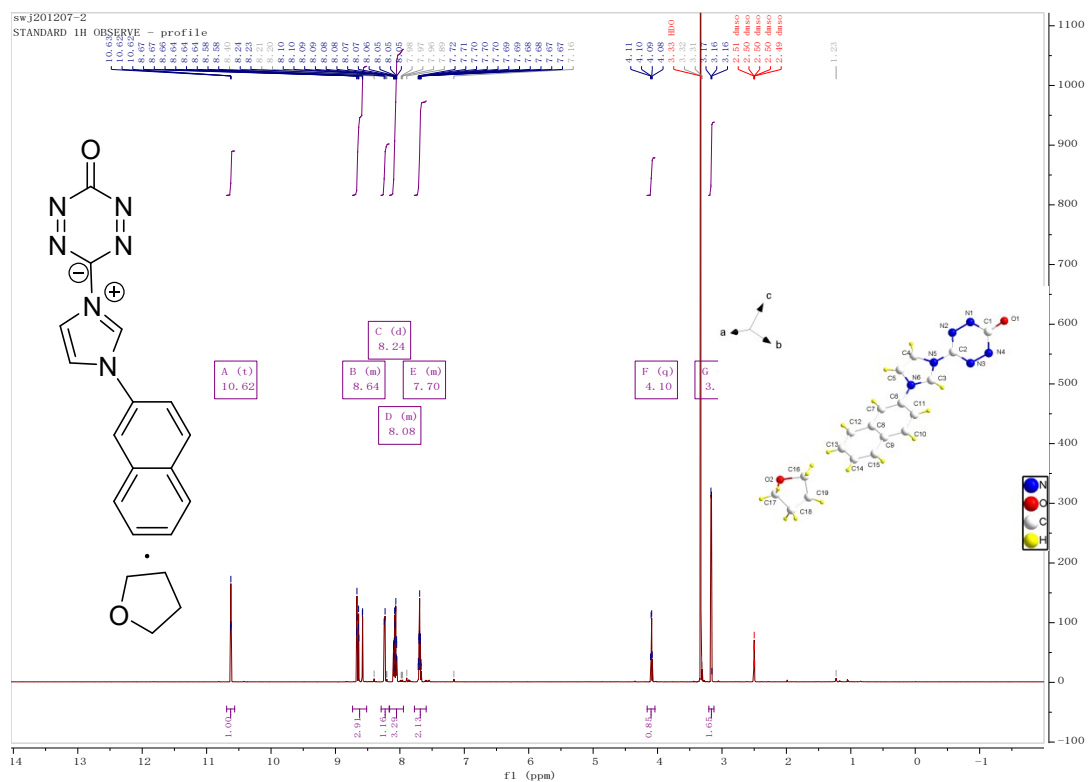

Figure S91.  $^1\text{H-NMR}$  spectra of 3ab in DMSO- $d_6$

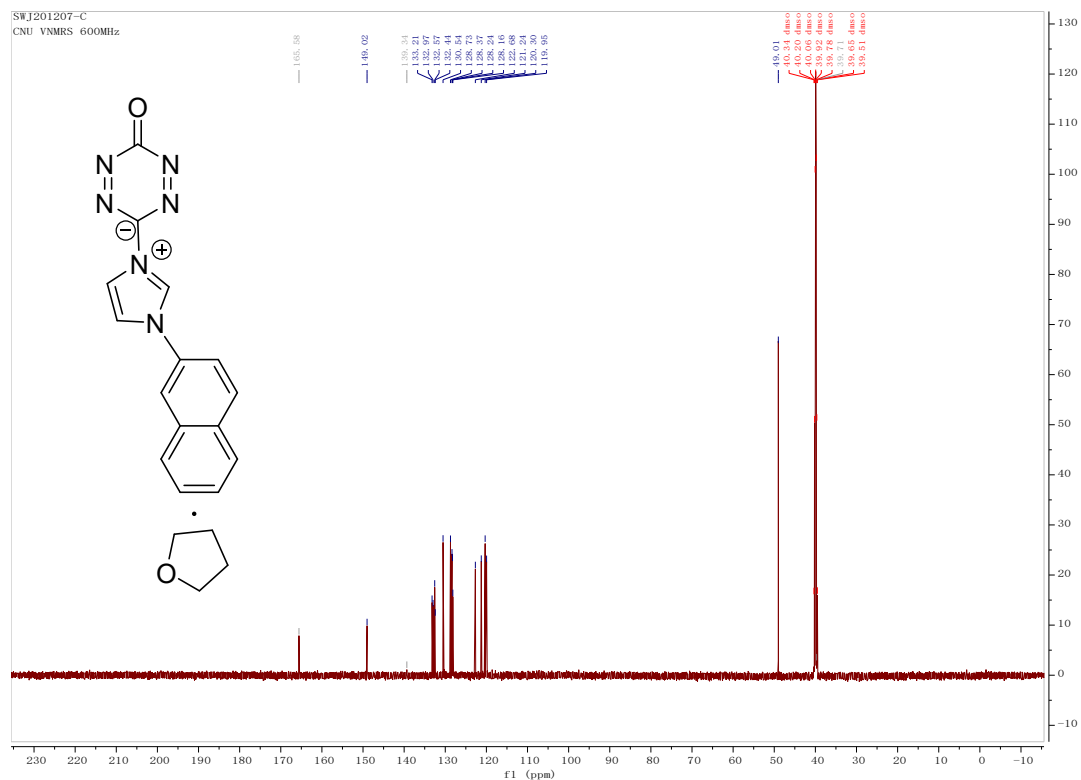

Figure S92.  $^{13}\text{C}$ -NMR spectra of 3ab in  $\text{DMSO-}d_6$

3\_201224133336 #17 RT: 0.23 AV: 1 NL: 8.46E5  
 T: FTMS + p ESI Full ms [200.0000-2500.0000]

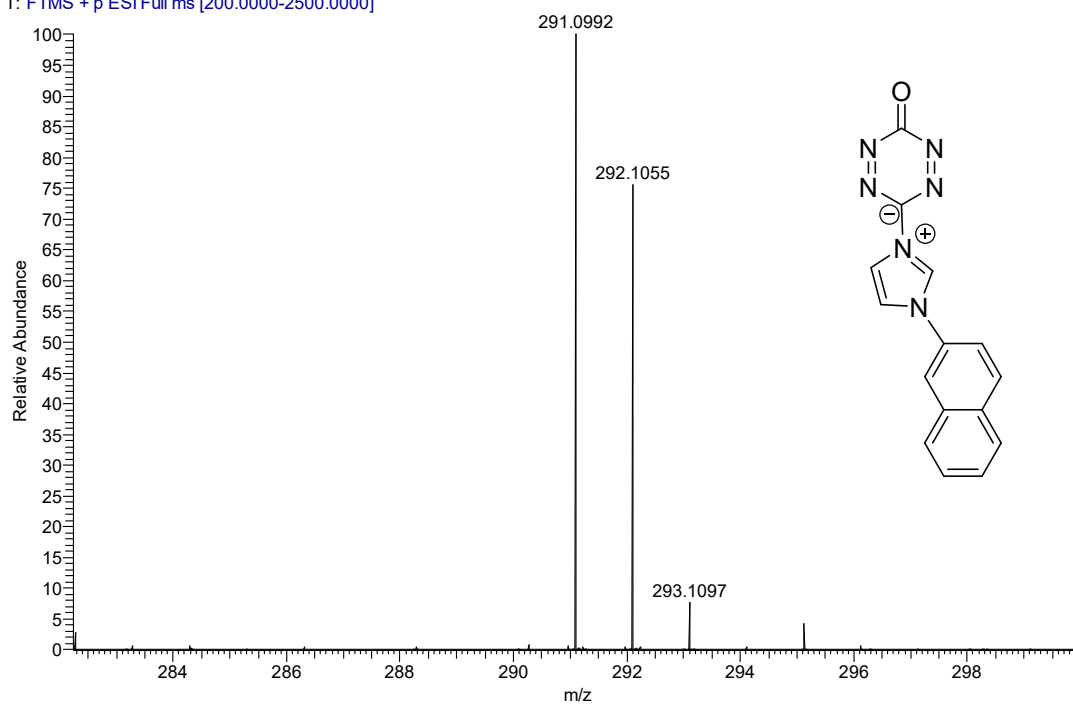

Figure S93. HRMS spectra of 3ab in  $\text{DMSO-}d_6$

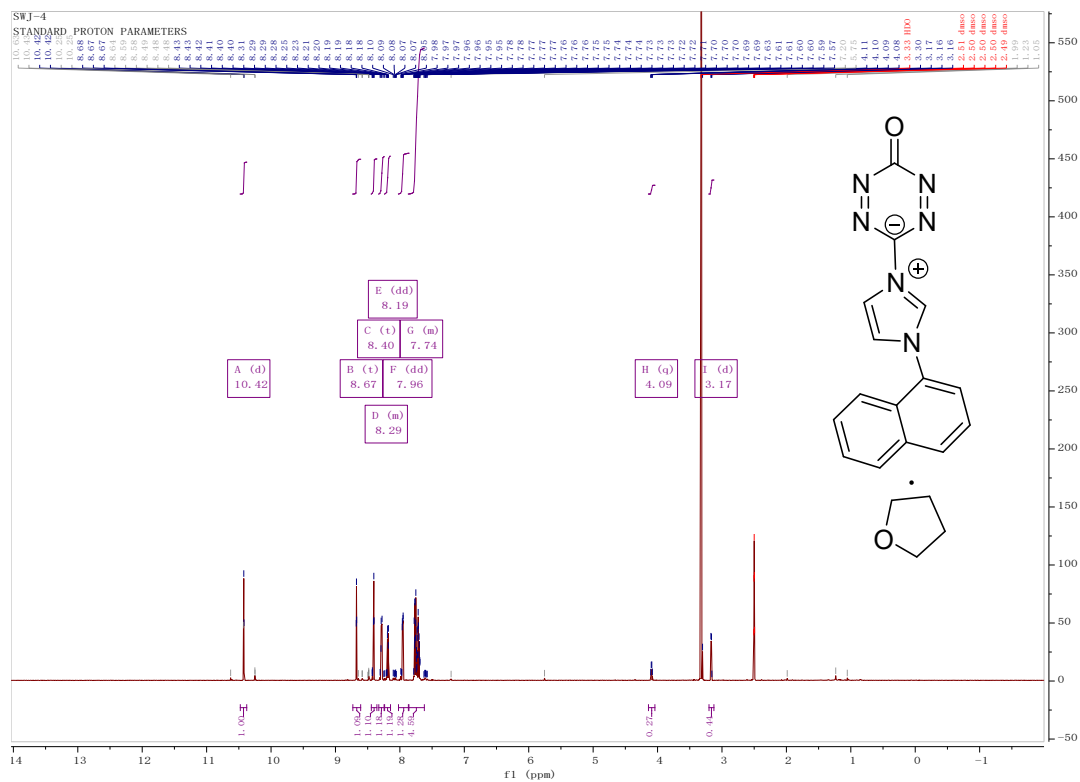

Figure S94.  $^1\text{H}$ -NMR spectra of 3ac in  $\text{DMSO-}d_6$

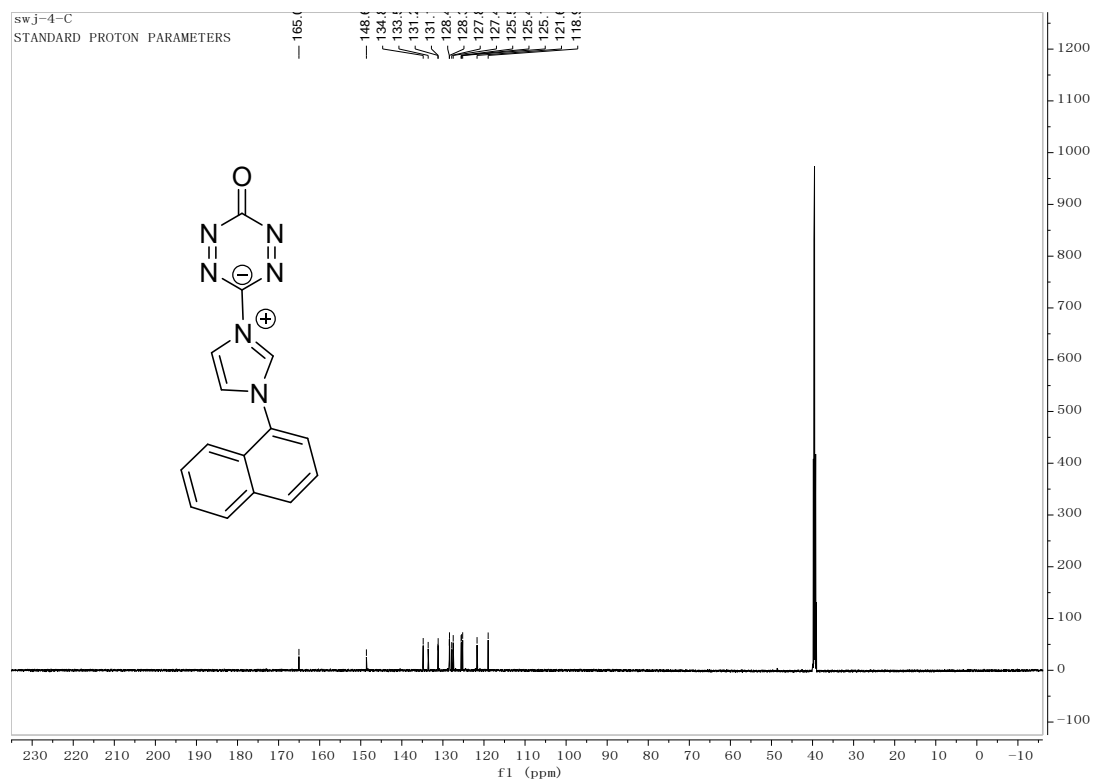

Figure S95.  $^{13}\text{C}$ -NMR spectra of 3ac in  $\text{DMSO-}d_6$

CNU-4\_210122110542 #17 RT: 0.17 AV: 1 NL: 3.48E8  
T: FTMS + p ESI Full ms [200.0000-2500.0000]

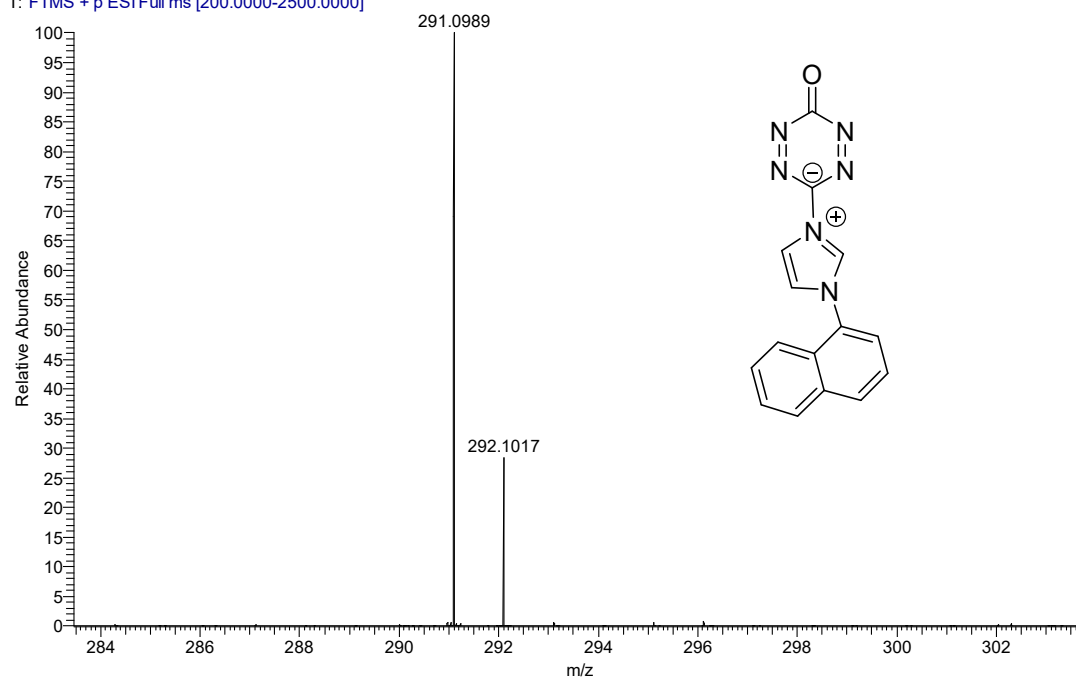

Figure S96. HRMS spectra of 3ac in DMSO- $d_6$

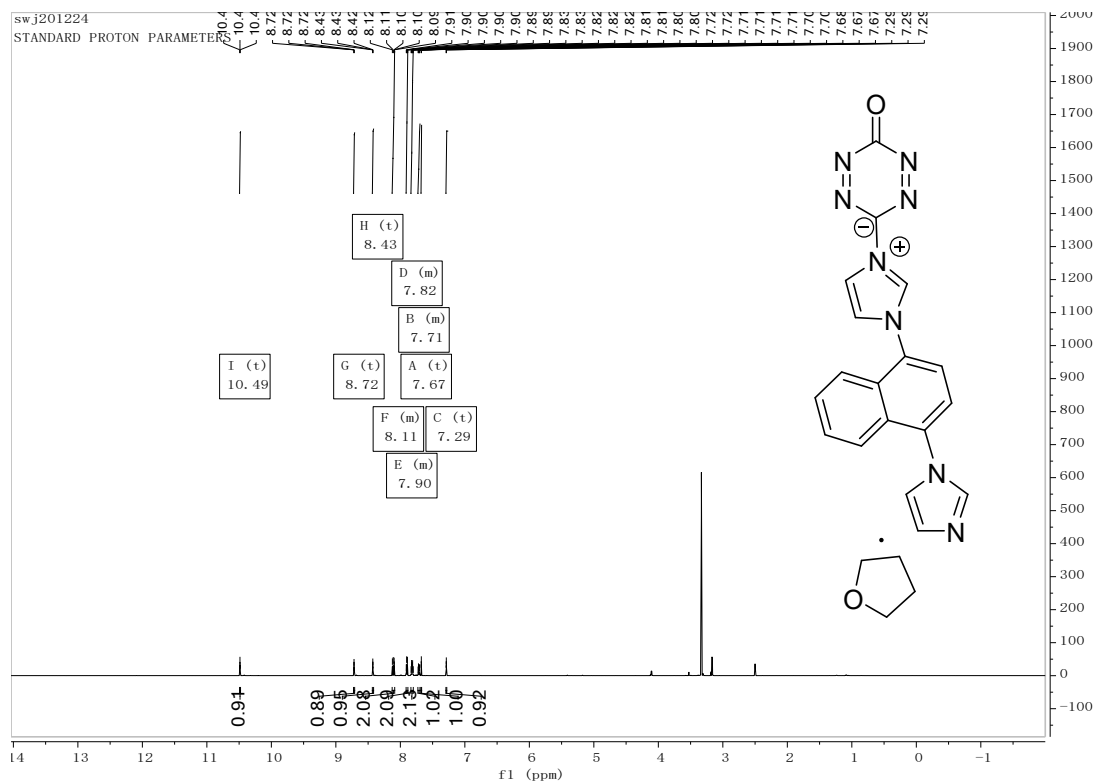

Figure S97.  $^1\text{H-NMR}$  spectra of 3ad in DMSO- $d_6$

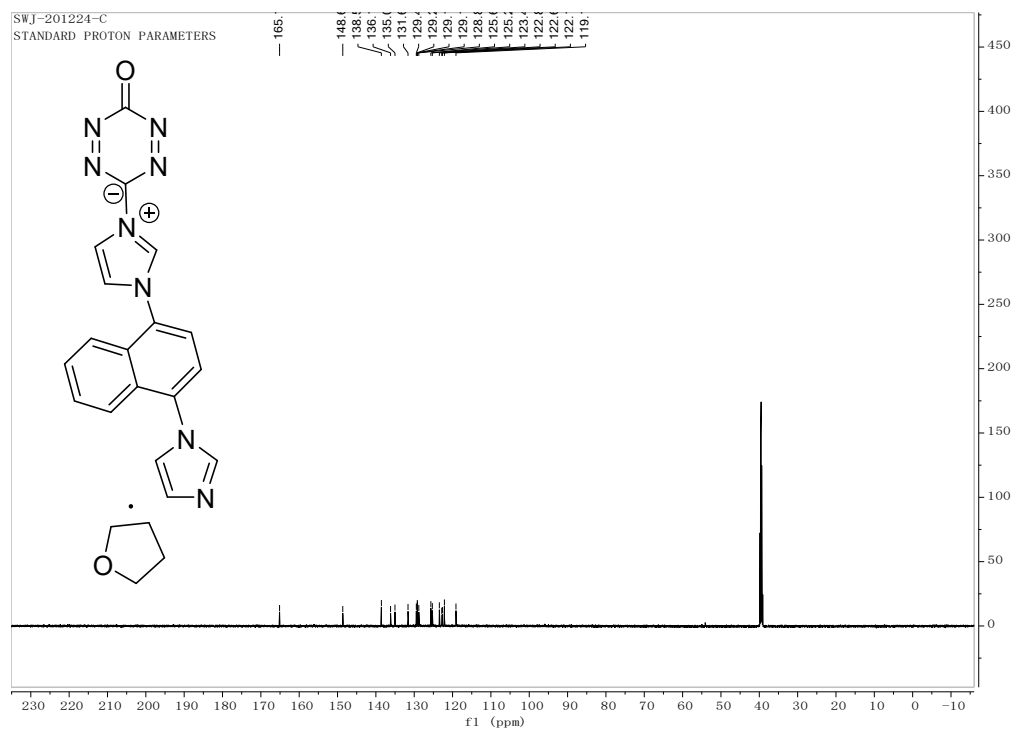

**Figure S98.**  $^{13}\text{C}$ -NMR spectra of 3ad in  $\text{DMSO}-d_6$

CNU-5\_210122110729 #17 RT: 0.17 AV: 1 SB: 1 0.13 NL: 7.06E7  
T: FTMS + p ESI Full ms [200.0000-2500.0000]

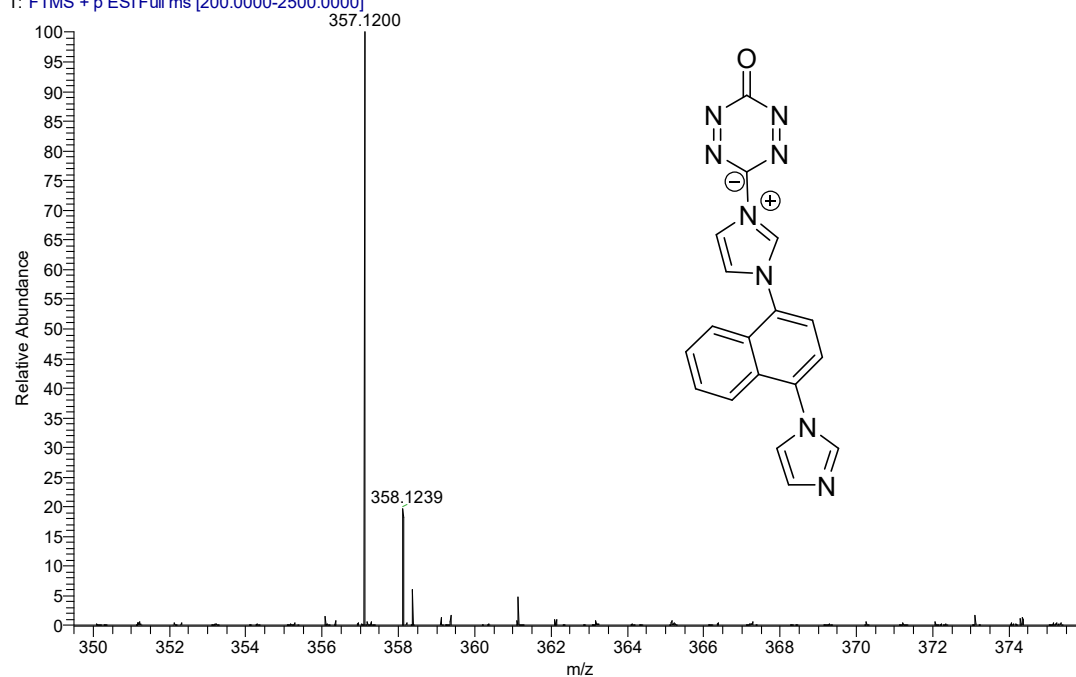

**Figure S99.** HRMS spectra of 3ad in  $\text{DMSO}-d_6$

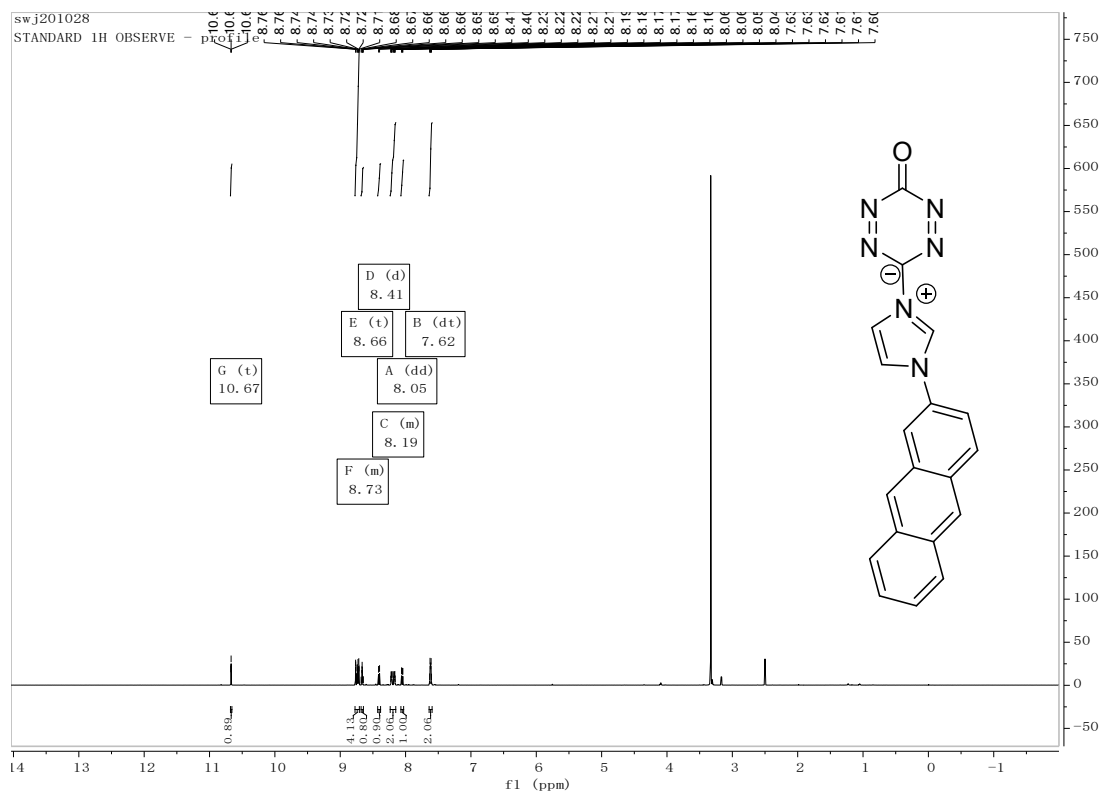

Figure S100.  $^1\text{H-NMR}$  spectra of 3ae in  $\text{DMSO-}d_6$

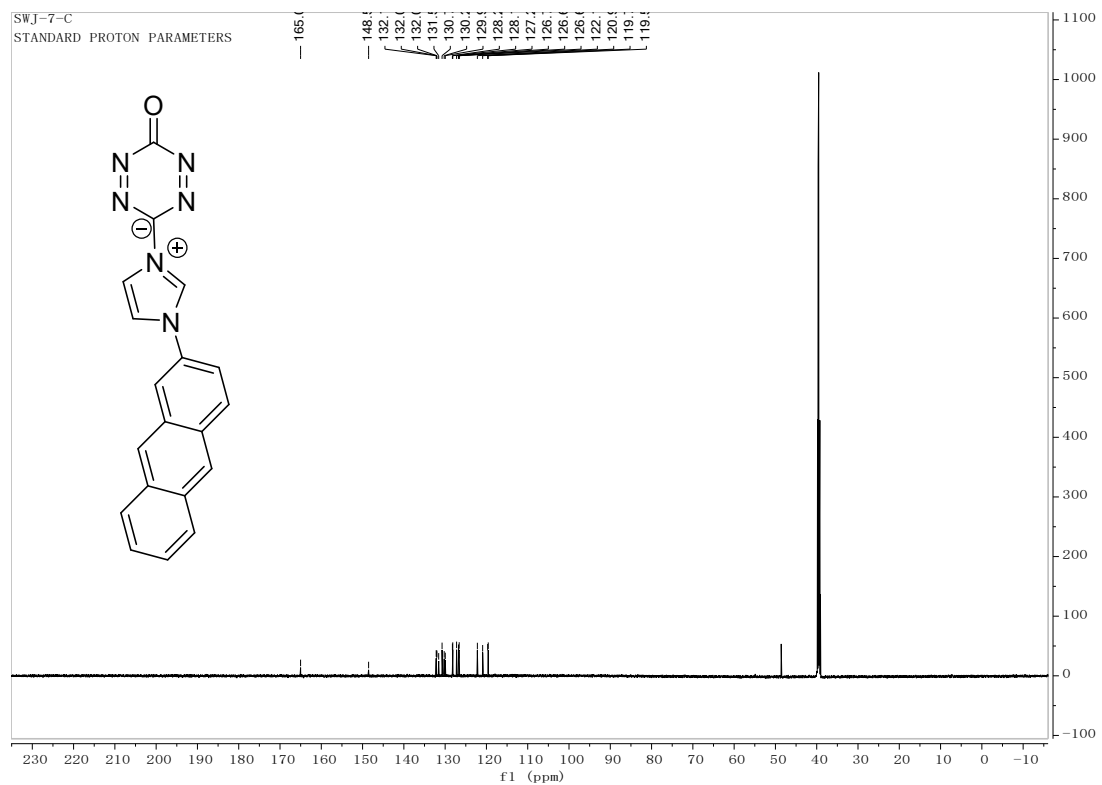

Figure S101.  $^{13}\text{C-NMR}$  spectra of 3ae in  $\text{DMSO-}d_6$

WJC-7 #25 RT: 0.25 AV: 1 NL: 2.41E8  
T: FTMS + p ESI Full ms [200.0000-2500.0000]

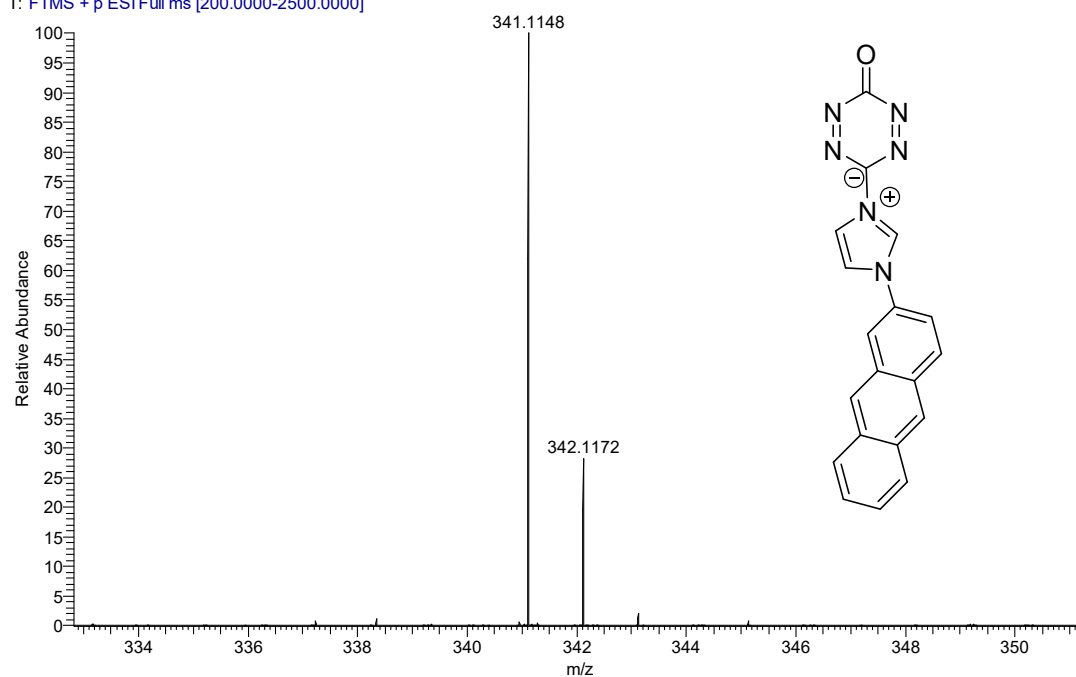

Figure S102. HRMS spectra of 3ae in DMSO-d<sub>6</sub>

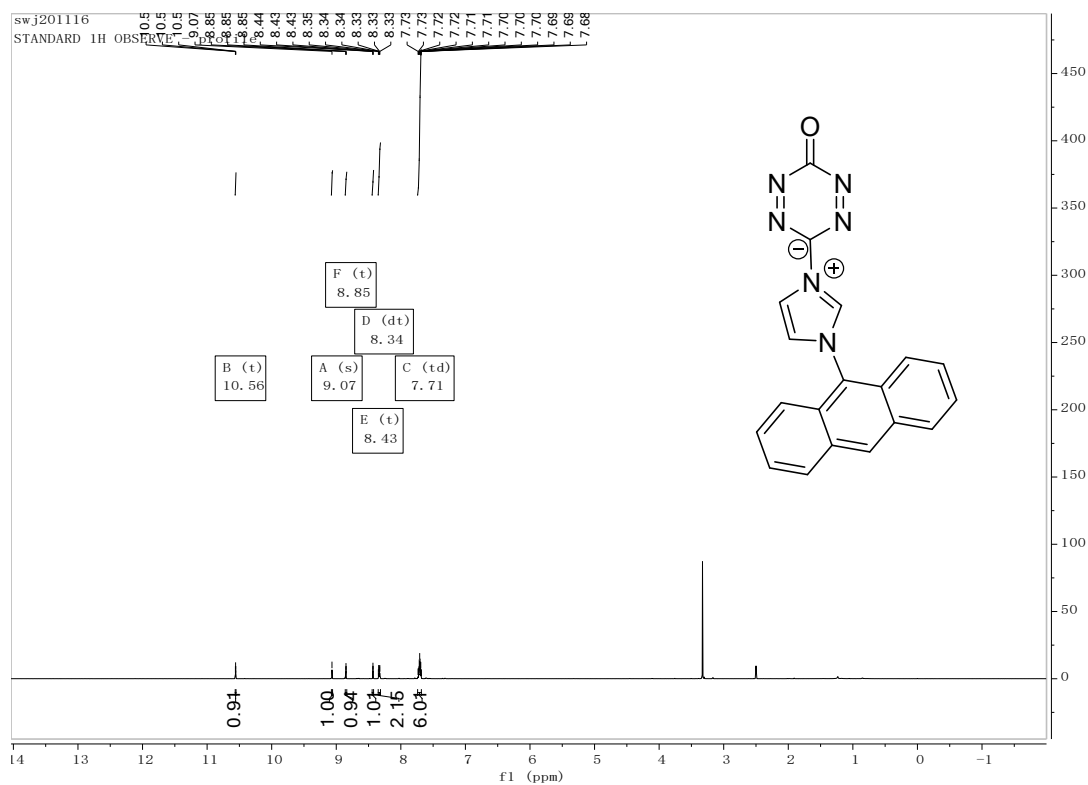

Figure S103. <sup>1</sup>H-NMR spectra of 3af in DMSO-d<sub>6</sub>

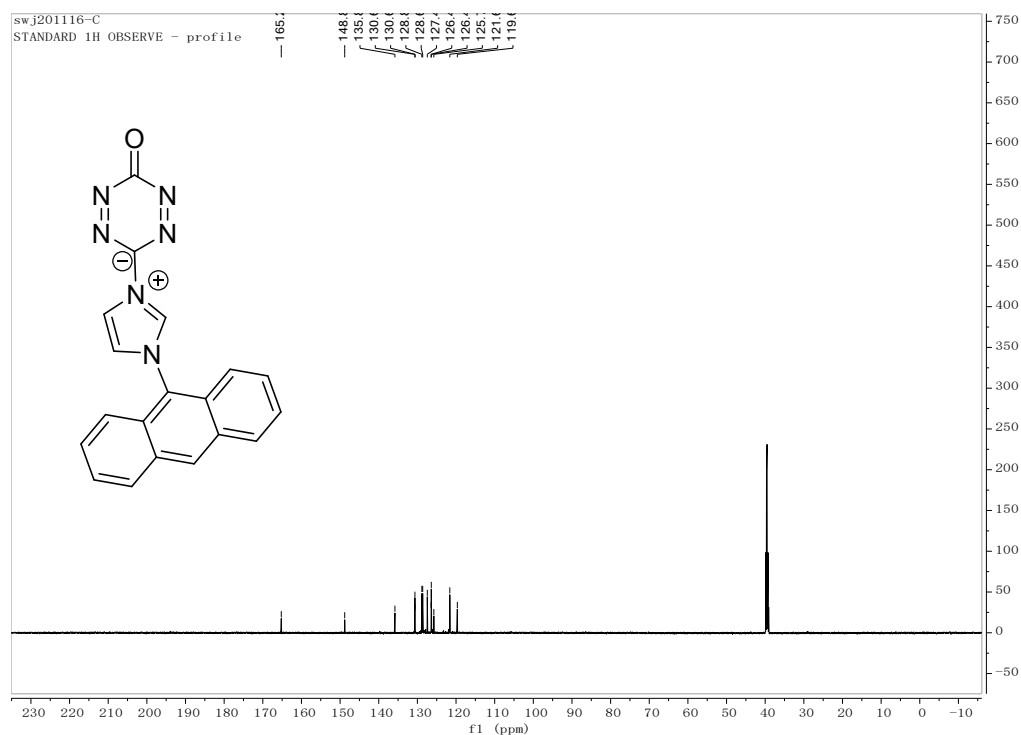

**Figure S104.**  $^{13}\text{C}$ -NMR spectra of 3af in  $\text{DMSO-}d_6$

WJC-8 #22 RT: 0.22 AV: 1 NL: 5.30E6  
T: FTMS - p ESI Full ms [200.0000-2500.0000]

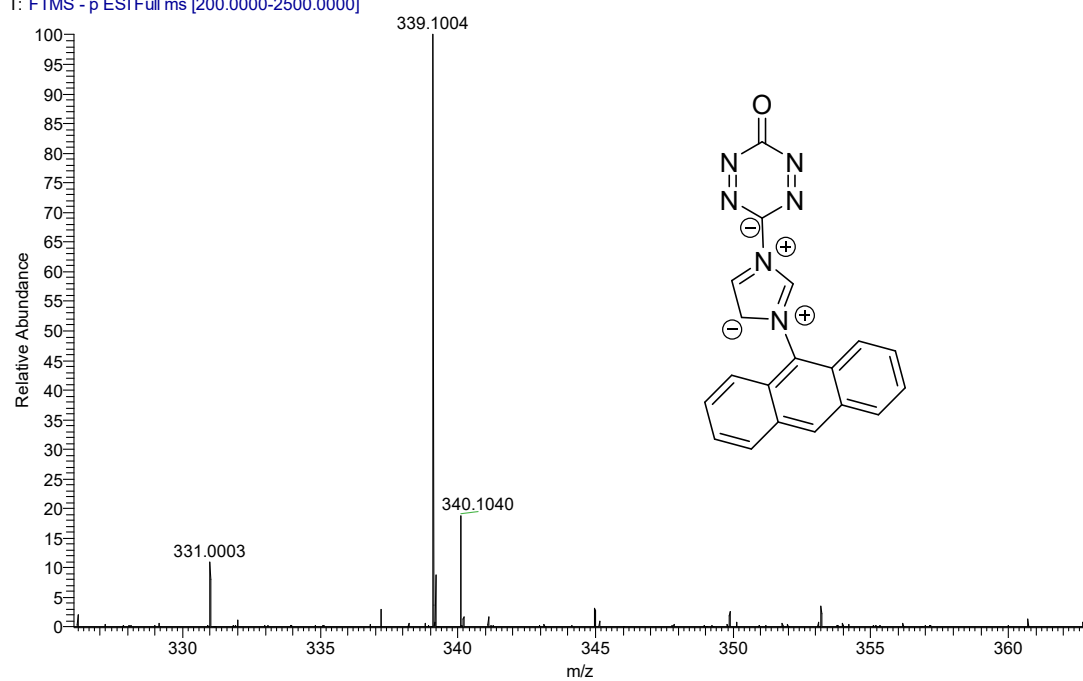

**Figure S105.** HRMS spectra of 3af in  $\text{DMSO-}d_6$



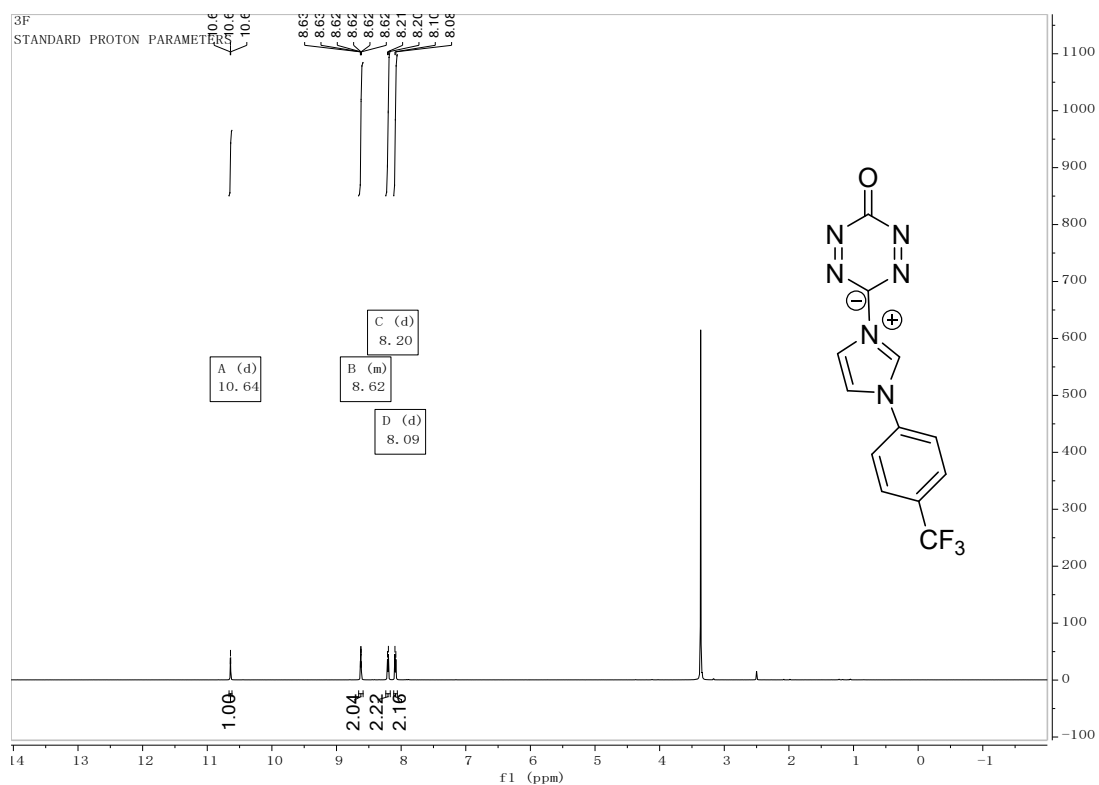

Figure S106. <sup>1</sup>H-NMR spectra of 3ag in DMSO-*d*<sub>6</sub>

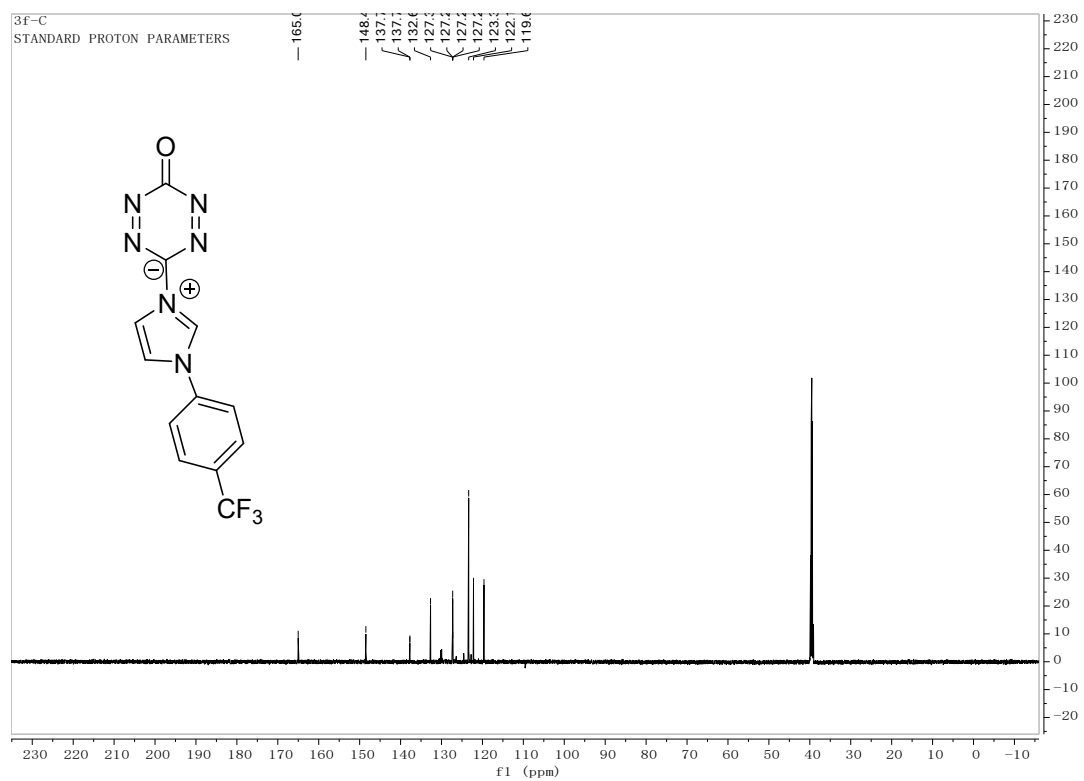

Figure S107. <sup>13</sup>C-NMR spectra of 3ag in DMSO-*d*<sub>6</sub>

WJC-11 #25 RT: 0.25 AV: 1 NL: 4.57E8  
T: FTMS + p ESI Full ms [200.0000-2500.0000]

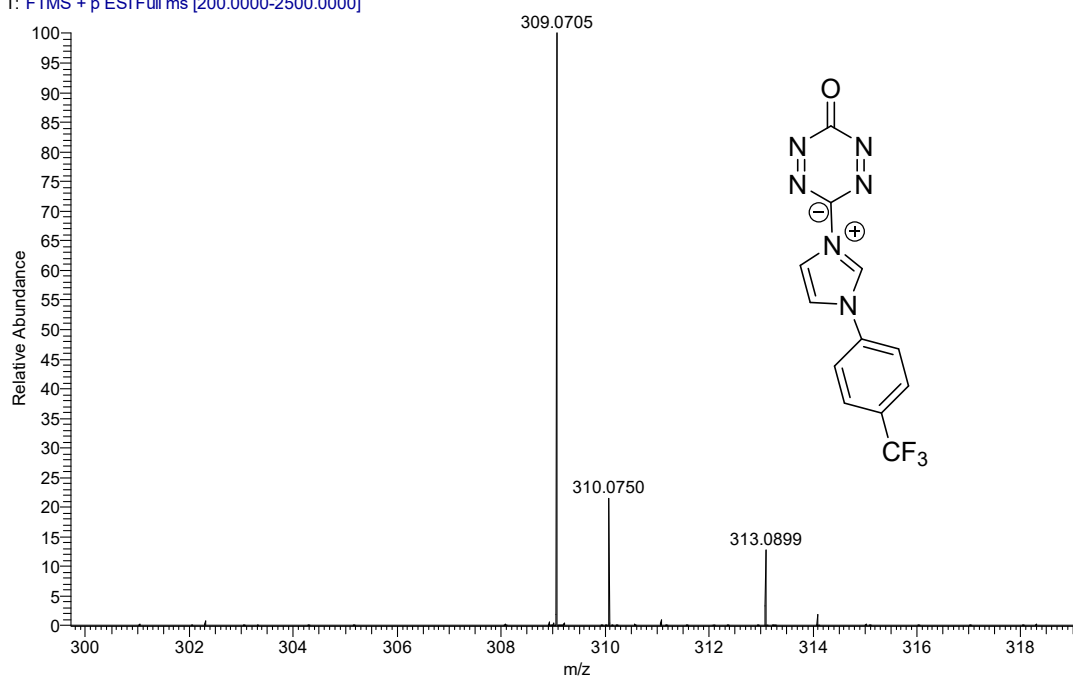

Figure S108. HRMS spectra of 3ag in DMSO- $d_6$

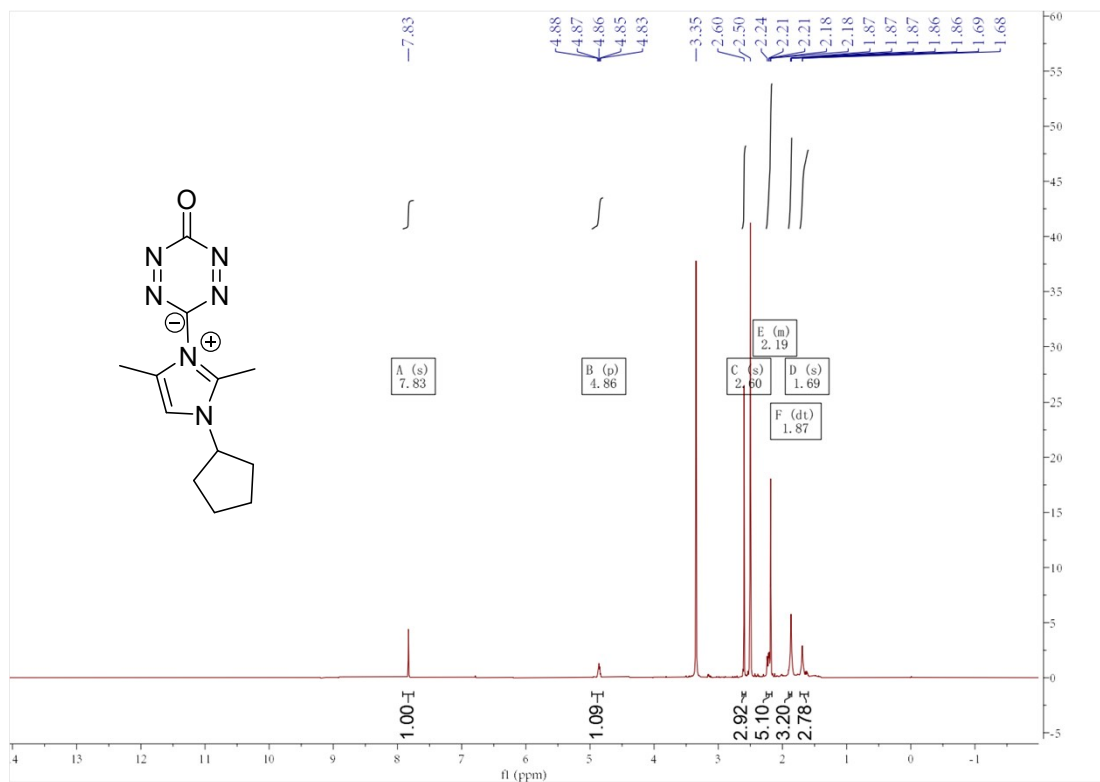

Figure S109.  $^1\text{H-NMR}$  spectra of 3ah in DMSO- $d_6$

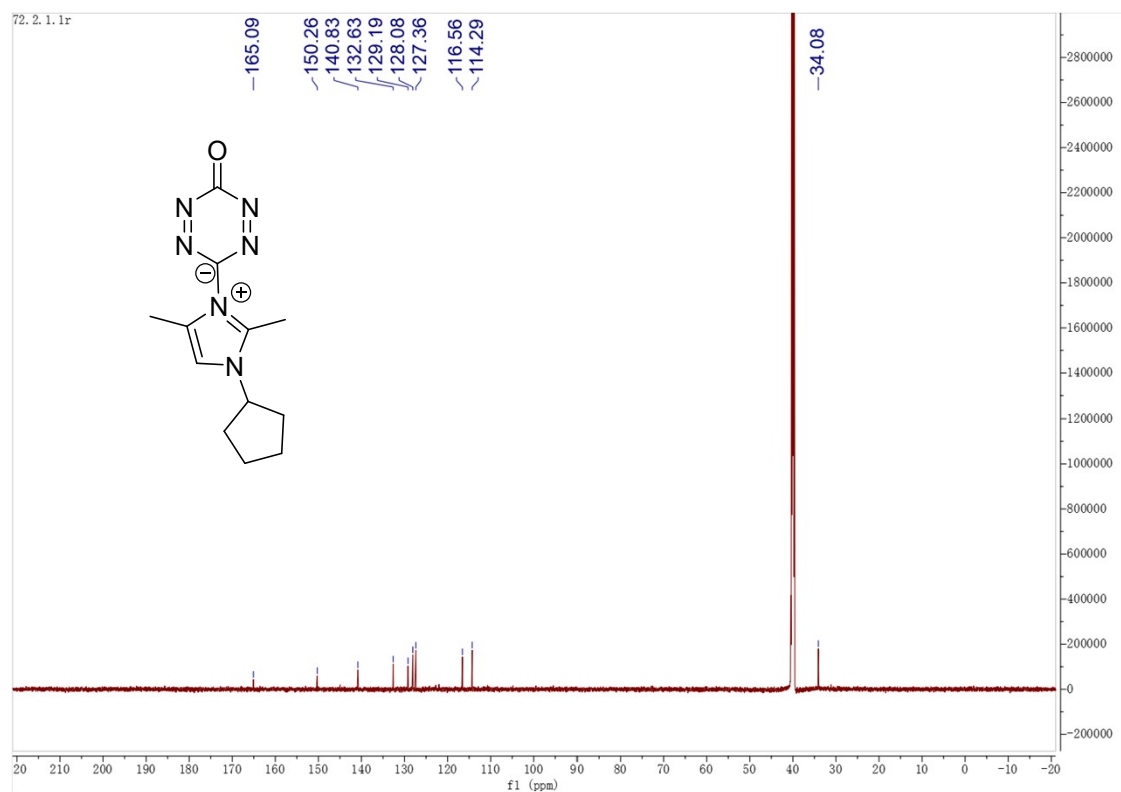

Figure S110.  $^{13}\text{C}$ -NMR spectra of 3ah in  $\text{DMSO-}d_6$

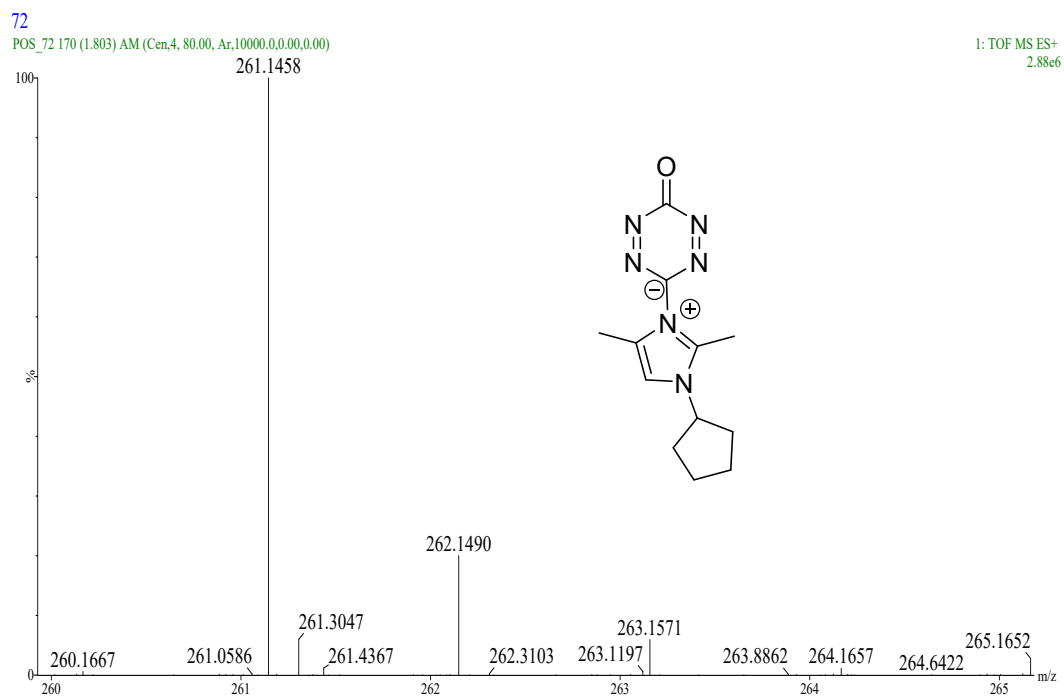

Figure S111. HRMS spectra of 3ah in  $\text{DMSO-}d_6$

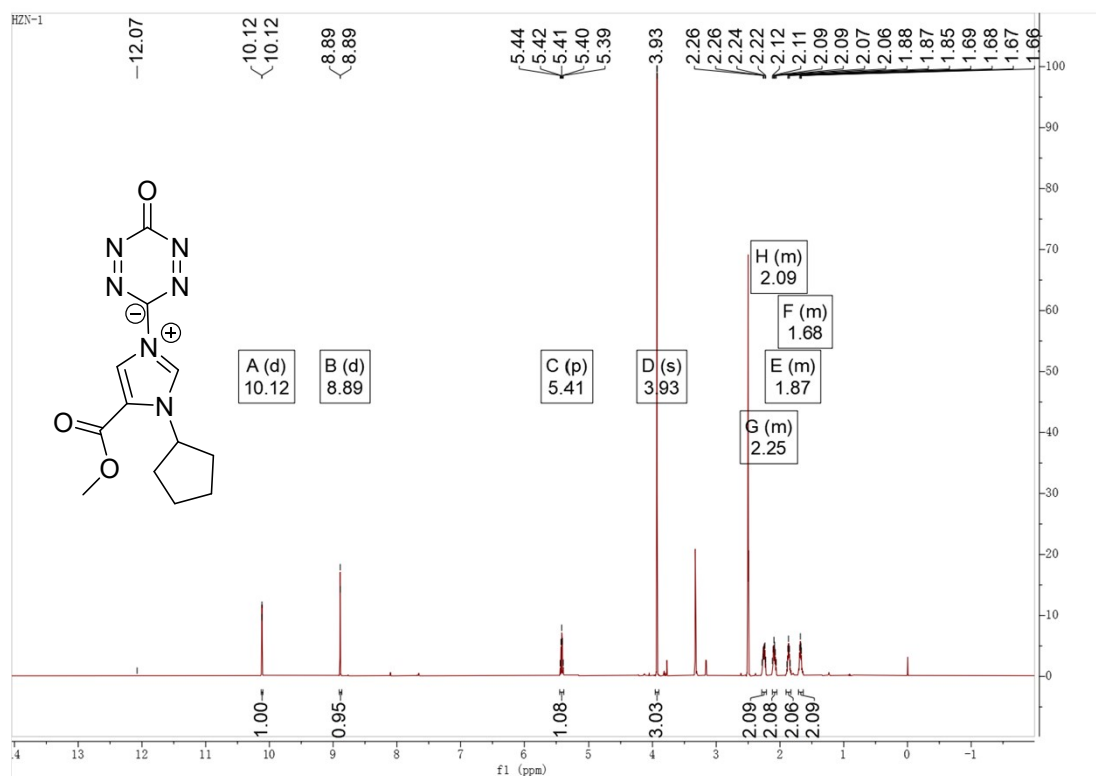

Figure S112.  $^1\text{H-NMR}$  spectra of 3ai in  $\text{DMSO-}d_6$

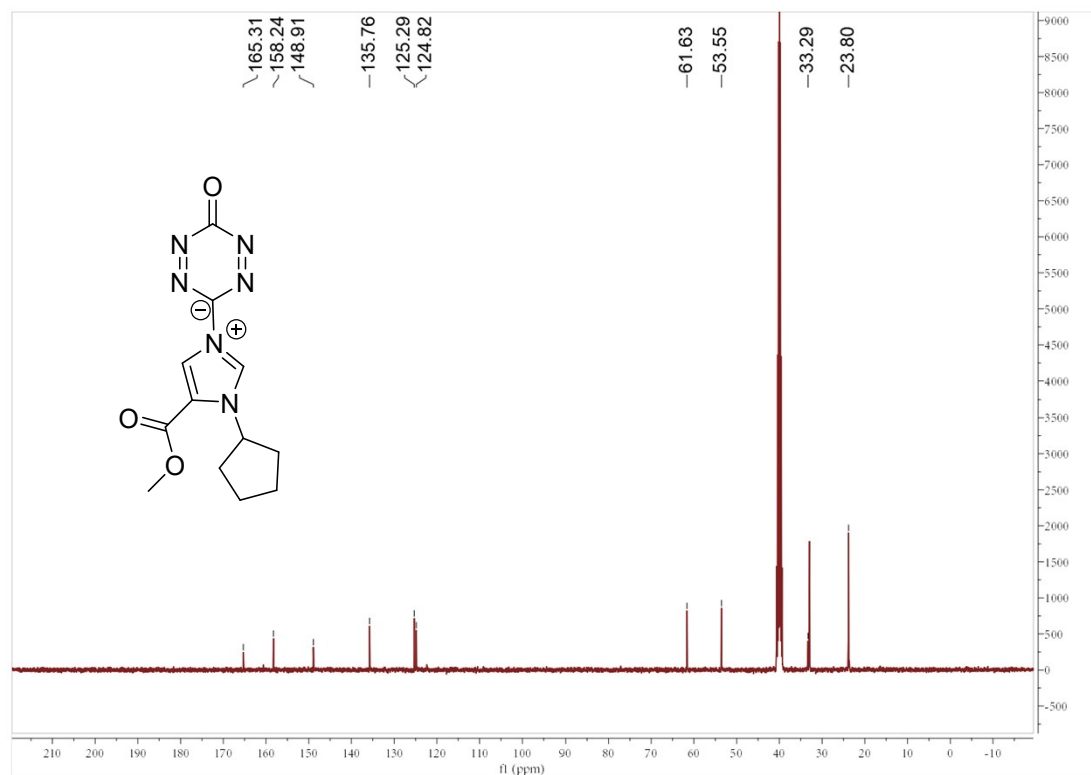

Figure S113.  $^{13}\text{C-NMR}$  spectra of 3ai in  $\text{DMSO-}d_6$

HZN-1

POS\_HZN-1 161 (1.767) AM (Cen.4, 80.00, Ar.10000.0,0.00,0.00)

1: TOF MS ES+  
1.07e7

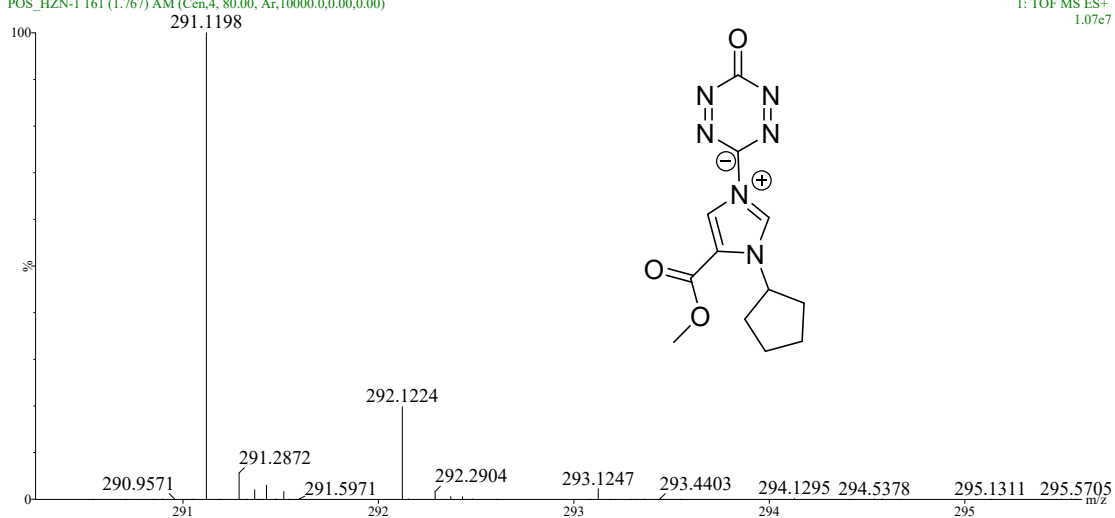

Figure S114. HRMS spectra of 3ai in DMSO- $d_6$

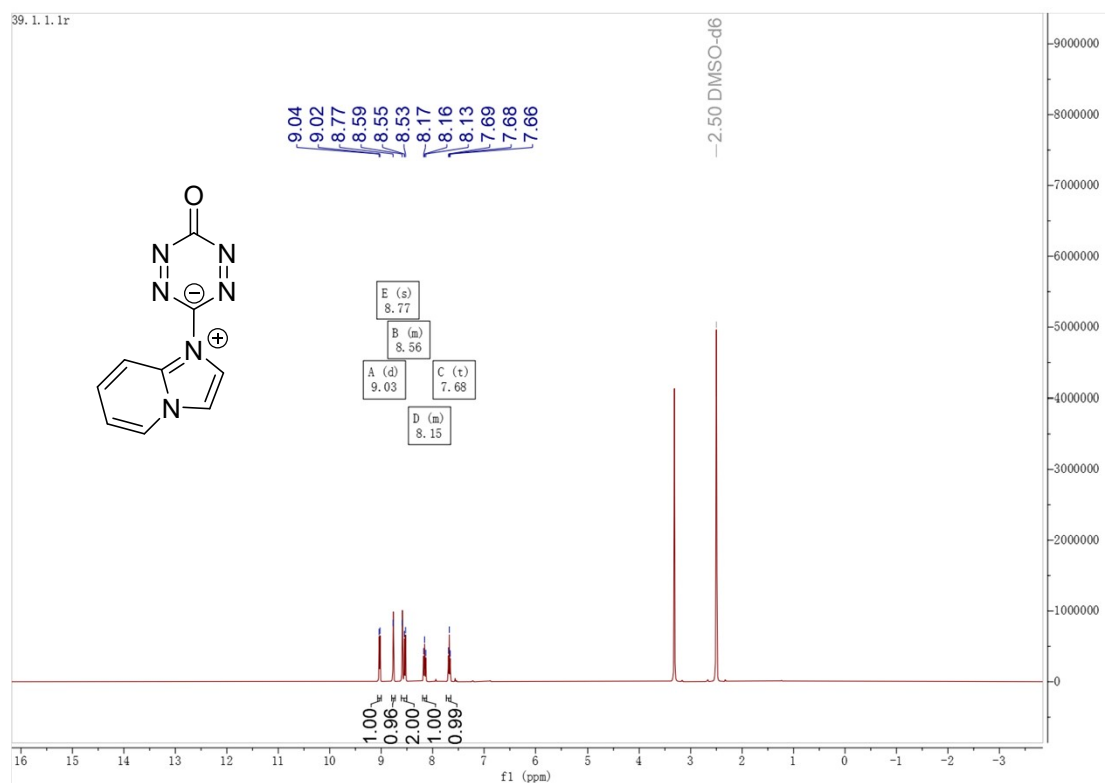

Figure S115.  $^1\text{H}$ -NMR spectra of 3aj in DMSO- $d_6$

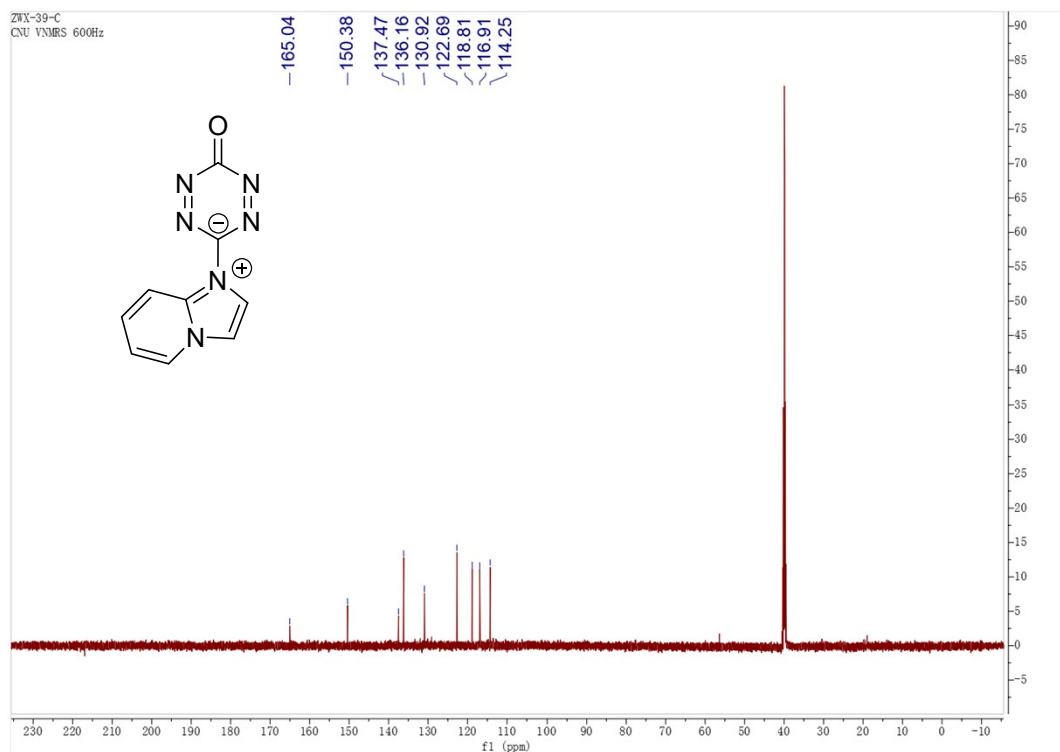

Figure S116.  $^{13}\text{C}$ -NMR spectra of 3aj in  $\text{DMSO-}d_6$

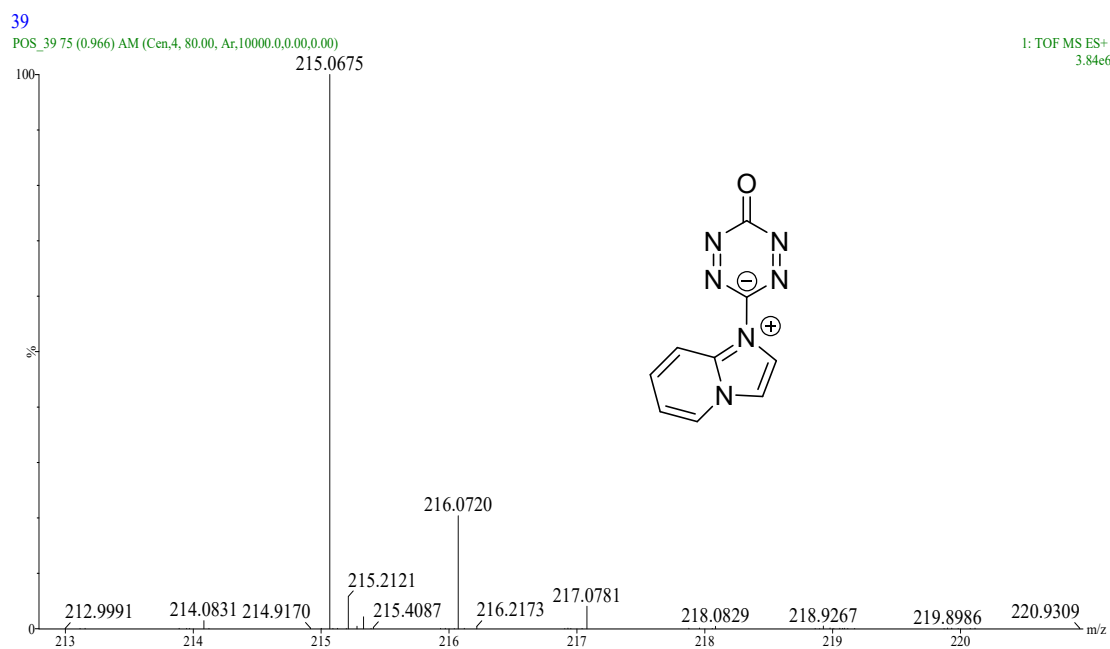

Figure S117. HRMS spectra of 3aj in  $\text{DMSO-}d_6$

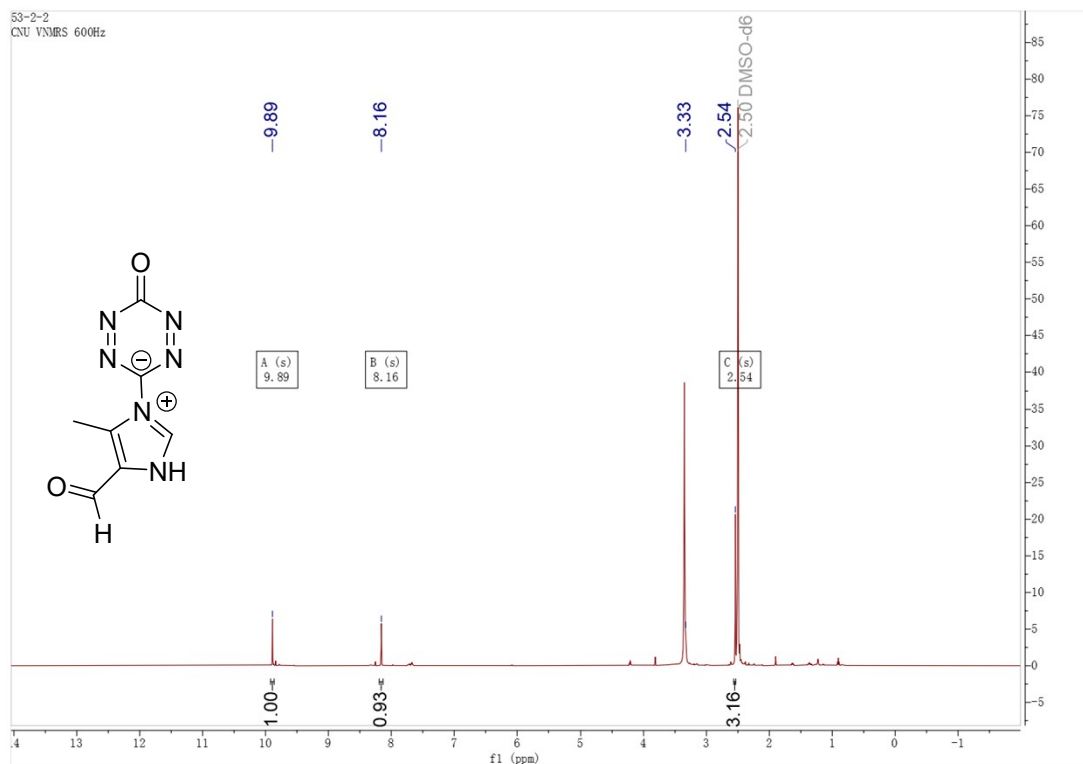

Figure S118.  $^1\text{H}$ -NMR spectra of 3ak in  $\text{DMSO-}d_6$

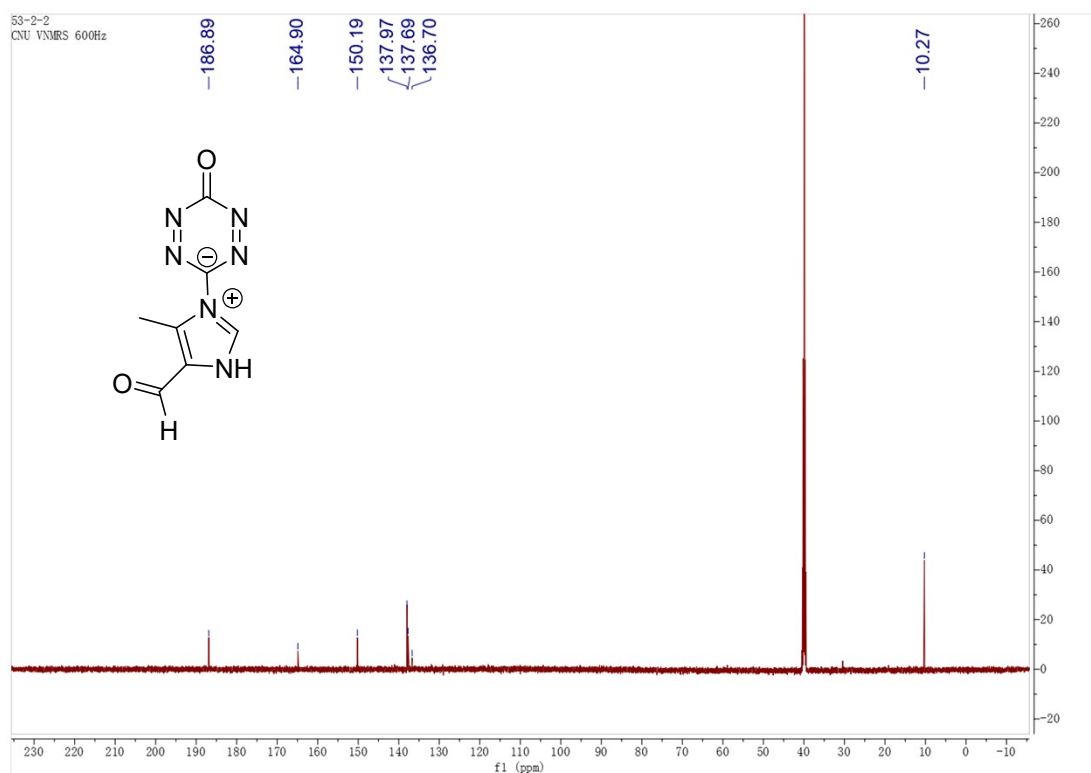

Figure S119.  $^{13}\text{C}$ -NMR spectra of 3ak in  $\text{DMSO-}d_6$

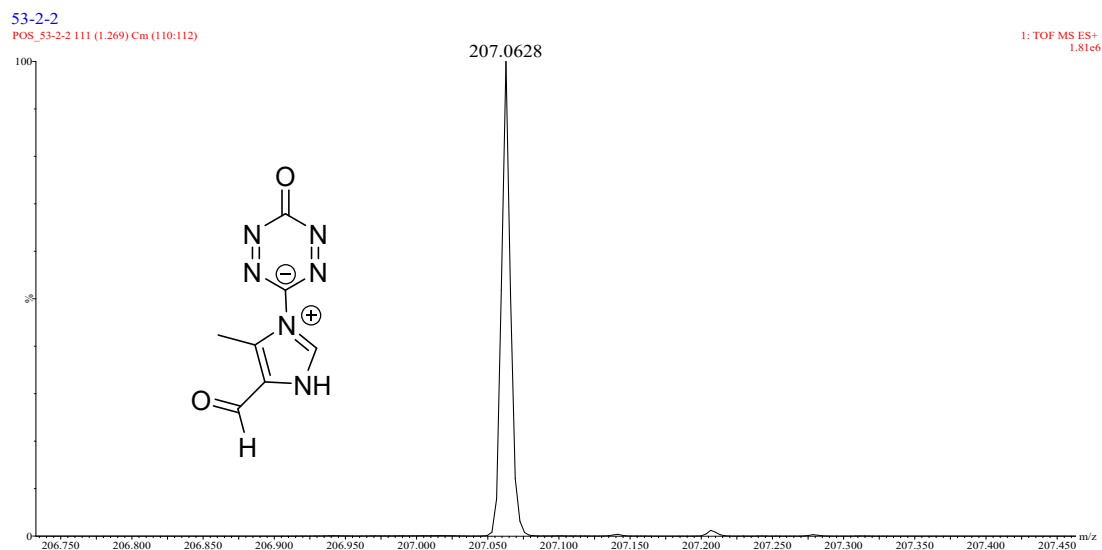

Figure S120. HRMS spectra of 3ak in DMSO- $d_6$

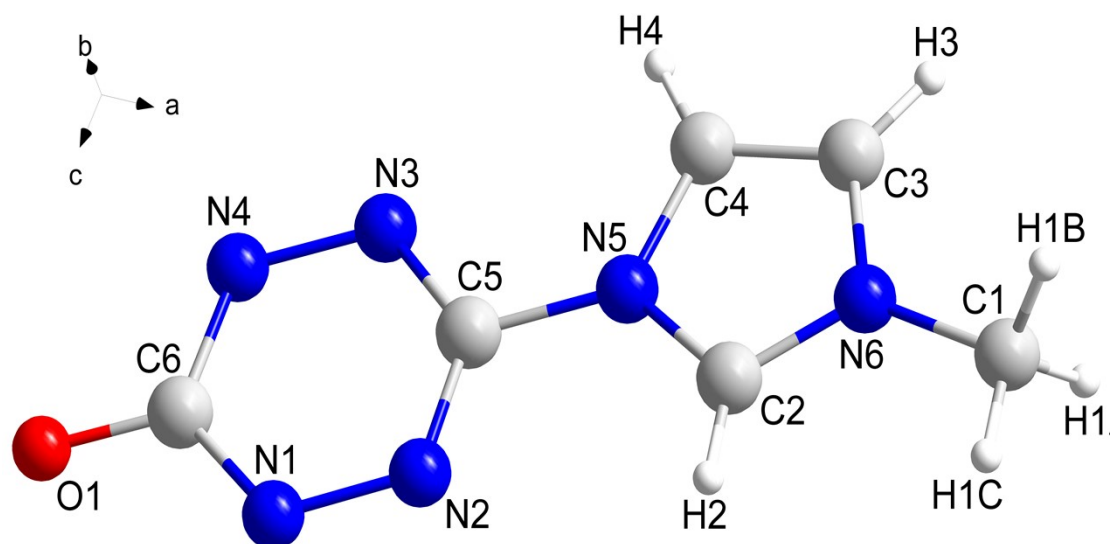

Figure S121. X-ray structure of 3a

Table S1. Crystallographic data and structural corrections of 3a

| Complex            | 3a                 |
|--------------------|--------------------|
| Formula            | $C_6H_6N_6O, H_2O$ |
| Formula weight     | 197.19             |
| T/K                | 298.68(10)         |
| Crystal system     | orthorhombic       |
| Space group        | $Pca Z_1$          |
| $a(\text{\AA})$    | 14.1035(3)         |
| $b(\text{\AA})$    | 6.3113(2)          |
| $c(\text{\AA})$    | 9.5102(2)          |
| $\alpha(^{\circ})$ | 90                 |
| $\beta(^{\circ})$  | 90                 |



|                                               |           |
|-----------------------------------------------|-----------|
| $\gamma(^{\circ})$                            | 90        |
| $V(\text{\AA}^3)$                             | 846.52(4) |
| $Z$                                           | 4         |
| $D_{\text{calc}}/\text{g}\cdot\text{cm}^{-3}$ | 1.547     |
| $F(000)$                                      | 412       |
| Goodness-of-fit on $F^2$                      | 1.071     |
| $R_{\text{int}}$                              | 0.1243    |
| $R_1[I]2\sigma(I)^a$                          | 0.1170    |
| $wR_2[I]2\sigma(I)^b$                         | 0.2392    |
| $R_1(\text{all data})^a$                      | 0.1227    |
| $wR_2(\text{all data})^b$                     | 0.2478    |

Table S2. Selected bond length ( $\text{\AA}$ ) of **3a**

| atom | atom | bond length<br>( $\text{\AA}$ ) | atom | atom | bond length<br>( $\text{\AA}$ ) |
|------|------|---------------------------------|------|------|---------------------------------|
| O1   | C6   | 1.234(4)                        | N1   | N2   | 1.314(4)                        |
| N1   | C6   | 1.375(5)                        | N2   | C5   | 1.325(4)                        |
| N3   | N4   | 1.317(3)                        | N3   | C5   | 1.327(3)                        |
| N4   | C6   | 1.381(5)                        | N5   | C2   | 1.337(3)                        |
| N5   | C4   | 1.391(3)                        | N5   | C5   | 1.415(3)                        |
| N6   | C1   | 1.456(4)                        | N6   | C2   | 1.322(3)                        |
| N6   | C3   | 1.378(4)                        | C1   | H1A  | 0.9600                          |
| C1   | H1C  | 0.9600                          | C1   | H1B  | 0.9600                          |
| C2   | H2   | 0.9300                          | C3   | H3   | 0.9300                          |
| C3   | C4   | 1.338(4)                        | C4   | H4   | 0.9300                          |

Table S3. Selected bond angle ( $^{\circ}$ ) of **3a**

| atom | atom | atom | bond<br>angel<br>( $^{\circ}$ ) | atom | atom | atom | bond<br>angel<br>( $^{\circ}$ ) |
|------|------|------|---------------------------------|------|------|------|---------------------------------|
| N2   | N1   | C6   | 118.7(2)                        | N1   | N2   | C5   | 117.0(2)                        |
| N4   | N3   | C5   | 116.7(2)                        | N3   | N4   | C6   | 118.7(3)                        |
| C2   | N5   | C4   | 108.6(2)                        | C2   | N5   | C5   | 125.1(2)                        |
| C4   | N5   | C5   | 126.3(2)                        | C2   | N6   | C1   | 125.1(2)                        |
| C2   | N6   | C3   | 109.6(2)                        | C3   | N6   | C1   | 125.3(2)                        |
| N6   | C1   | H1A  | 109.5                           | N6   | C1   | H1C  | 109.5                           |
| N6   | C1   | H1B  | 109.5                           | H1A  | C1   | H1C  | 109.5                           |
| H1A  | C1   | H1B  | 109.5                           | H1C  | C1   | H1B  | 109.5                           |
| N5   | C2   | H2   | 126.1                           | N6   | C2   | N5   | 107.7(2)                        |

|    |    |    |          |    |    |    |          |
|----|----|----|----------|----|----|----|----------|
| N6 | C2 | H2 | 126.1    | N6 | C3 | H3 | 126.4    |
| C4 | C3 | N6 | 107.2(2) | C4 | C3 | H3 | 126.4    |
| N5 | C4 | H4 | 126.6    | C3 | C4 | N5 | 106.8(2) |
| C3 | C4 | H4 | 126.6    | N2 | C5 | N3 | 127.4(2) |
| N2 | C5 | N5 | 116.3(2) | N3 | C5 | N5 | 116.3(2) |
| O1 | C6 | N1 | 120.1(3) | O1 | C6 | N4 | 118.4(3) |
| N1 | C6 | N4 | 121.5(3) |    |    |    |          |

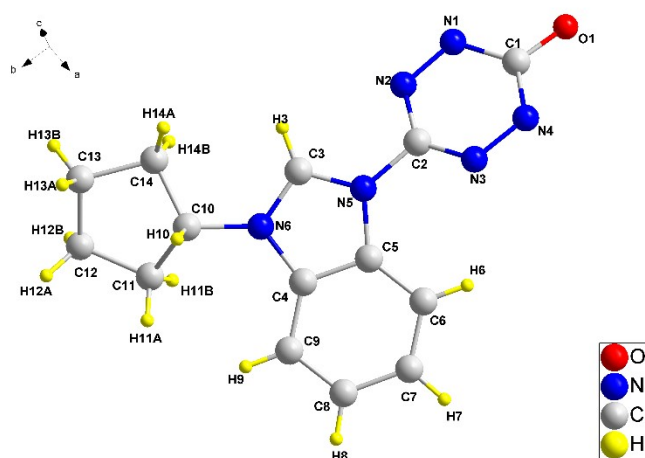

Figure S122. X-ray structure of **3z**

Table S4. Crystallographic data and structural corrections of **3z**

| Complex       | <b>3z</b>                                        |
|---------------|--------------------------------------------------|
| Formula       | C <sub>14</sub> H <sub>14</sub> N <sub>6</sub> O |
| Formulaweight | 282.31                                           |
| Temperature/K | 100.00(10)                                       |
| Crystalsystem | <i>Monoclinic</i>                                |
| Spacegroup    | <i>Ia</i>                                        |
| <i>a</i> (Å)  | 8.18400(10)                                      |
| <i>b</i> (Å)  | 17.2477(2)                                       |
| <i>c</i> (Å)  | 9.19330(10)                                      |

|                                         |                                                              |
|-----------------------------------------|--------------------------------------------------------------|
| $\alpha(^{\circ})$                      | 90                                                           |
| $\beta(^{\circ})$                       | 101.3680(10)                                                 |
| $\gamma(^{\circ})$                      | 90                                                           |
| $V(\text{\AA}^3)$                       | 1272.22(3)                                                   |
| Z                                       | 4                                                            |
| $\rho_{\text{calc}}/\text{cm}^3$        | 1.474                                                        |
| $F(000)$                                | 592.0                                                        |
| Reflections collected                   | 7256                                                         |
| Independent reflections                 | 1883 [ $R_{\text{int}}=0.0295$ , $R_{\text{sigma}}=0.0203$ ] |
| Goodness-of-fit on $F^2$                | 1.054                                                        |
| Final R indexes [ $I \geq 2\sigma(I)$ ] | $R_1=0.0274$ , $wR_2=0.0733$                                 |
| Final R indexes [all data]              | $R_1=0.0275$ , $wR_2=0.0734$                                 |

Table S5. Selected bond length ( $\text{\AA}$ ) of **3z**

| atom | atom | bond length<br>( $\text{\AA}$ ) | atom | atom | bond length<br>( $\text{\AA}$ ) |
|------|------|---------------------------------|------|------|---------------------------------|
| O1   | C1   | 1.243(2)                        | N4   | C1   | 1.389(3)                        |
| N6   | C4   | 1.397(2)                        | C4   | C5   | 1.395(3)                        |
| N6   | C10  | 1.490(2)                        | C4   | C9   | 1.396(3)                        |
| N6   | C3   | 1.334(2)                        | C5   | C6   | 1.389(3)                        |
| N2   | N1   | 1.317(2)                        | C6   | C7   | 1.383(3)                        |
| N2   | C2   | 1.325(3)                        | C10  | C11  | 1.540(3)                        |
| N1   | C1   | 1.389(3)                        | C10  | C14  | 1.517(3)                        |
| N5   | C5   | 1.408(3)                        | C9   | C8   | 1.379(3)                        |
| N5   | C2   | 1.425(2)                        | C11  | C12  | 1.544(3)                        |
| N5   | C3   | 1.343(3)                        | C8   | C7   | 1.405(3)                        |
| N3   | N4   | 1.322(2)                        | C14  | C13  | 1.531(3)                        |
| N3   | C2   | 1.328(3)                        | C13  | C12  | 1.533(3)                        |

Table S6. Selected bond angle ( $^{\circ}$ ) of **3z**

| atom | atom | atom | bond<br>angel (°) | atom | atom | atom | bond<br>angel (°) |
|------|------|------|-------------------|------|------|------|-------------------|
| C4   | N6   | C10  | 126.18(16)        | C6   | C5   | N5   | 132.32(19)        |
| C3   | N6   | C4   | 108.40(16)        | C6   | C5   | C4   | 122.23(18)        |
| C3   | N6   | C10  | 124.63(16)        | C7   | C6   | C5   | 116.29(18)        |
| N1   | N2   | C2   | 117.41(17)        | N2   | C2   | N5   | 116.12(17)        |
| N2   | N1   | C1   | 117.78(17)        | N2   | C2   | N3   | 127.27(18)        |
| C5   | N5   | C2   | 126.30(17)        | N3   | C2   | N5   | 116.46(18)        |
| C3   | N5   | C5   | 108.87(16)        | N6   | C10  | C11  | 114.06(16)        |
| C3   | N5   | C2   | 124.58(17)        | N6   | C10  | C14  | 113.40(16)        |
| N4   | N3   | C2   | 116.78(18)        | C14  | C10  | C11  | 104.28(17)        |
| N3   | N4   | C1   | 118.11(17)        | N6   | C3   | N5   | 109.82(17)        |
| C5   | C4   | N6   | 107.45(16)        | C8   | C9   | C4   | 116.80(18)        |
| C5   | C4   | C9   | 121.16(18)        | C10  | C11  | C12  | 104.15(16)        |
| C9   | C4   | N6   | 131.39(18)        | C9   | C8   | C7   | 121.70(19)        |
| O1   | C1   | N1   | 119.57(18)        | C10  | C14  | C13  | 101.47(16)        |
| O1   | C1   | N4   | 119.22(17)        | C14  | C13  | C12  | 103.56(17)        |
| N1   | C1   | N4   | 121.14(17)        | C6   | C7   | C8   | 121.82(19)        |
| C4   | C5   | N5   | 105.45(17)        | C13  | C12  | C11  | 106.62(17)        |

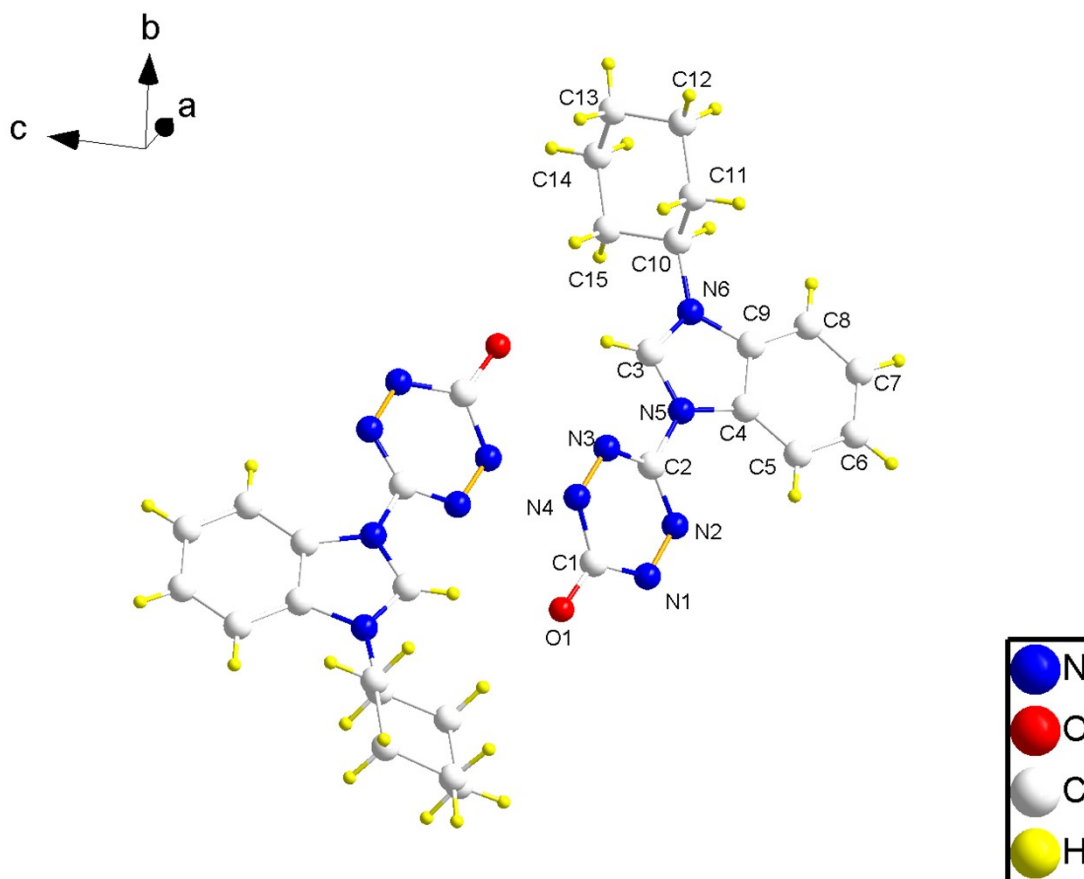

Figure S123. X-ray structure of 3aa

Table S7. Crystallographic data and structural corrections of 3aa

| Complex        | 3aa                                                            |
|----------------|----------------------------------------------------------------|
| Formula        | C <sub>30</sub> H <sub>32</sub> N <sub>12</sub> O <sub>2</sub> |
| Formula weight | 592.67                                                         |
| Temperature/K  | 294.44(13)                                                     |
| Crystalsystem  | orthorhombic                                                   |
| Spacegroup     | Pbca                                                           |
| <i>a</i> (Å)   | 17.2325(2)                                                     |
| <i>b</i> (Å)   | 18.0052(2)                                                     |
| <i>c</i> (Å)   | 18.4076(2)                                                     |
| $\alpha$ (°)   | 90                                                             |
| $\beta$ (°)    | 90                                                             |

|                                         |                                                              |
|-----------------------------------------|--------------------------------------------------------------|
| $\gamma(^{\circ})$                      | 90                                                           |
| $V(\text{\AA}^3)$                       | 5711.41(11)                                                  |
| $Z$                                     | 8                                                            |
| $\rho_{\text{calc}}/\text{cm}^3$        | 1.379                                                        |
| $F(000)$                                | 2496.0                                                       |
| Reflections collected                   | 22144                                                        |
| Independent reflections                 | 5712 [ $R_{\text{int}}=0.0240$ , $R_{\text{sigma}}=0.0209$ ] |
| Goodness-of-fit on $F^2$                | 1.061                                                        |
| Final R indexes [ $I \geq 2\sigma(I)$ ] | $R_1=0.0446$ , $wR_2=0.1121$                                 |
| Final R indexes [all data]              | $R_1=0.0488$ , $wR_2=0.1151$                                 |

Table S8. Selected bond length ( $\text{\AA}$ ) of **3aa**

| atom | atom | bond length ( $\text{\AA}$ ) | atom | atom | bond length ( $\text{\AA}$ ) |
|------|------|------------------------------|------|------|------------------------------|
| O1   | C1   | 1.2288(17)                   | N1   | C1   | 1.3836(19)                   |
| N2   | N1   | 1.3185(15)                   | N2   | C2   | 1.3148(16)                   |
| N3   | N4   | 1.3115(15)                   | N3   | C2   | 1.3236(16)                   |
| N4   | C1   | 1.385(2)                     | N5   | C2   | 1.4265(14)                   |
| N5   | C3   | 1.3371(15)                   | N5   | C4   | 1.4001(14)                   |
| N6   | C3   | 1.3270(15)                   | N6   | C9   | 1.3924(15)                   |
| N6   | C10  | 1.4802(15)                   | C4   | C5   | 1.3845(17)                   |
| C4   | C9   | 1.3903(17)                   | C5   | C6   | 1.3786(19)                   |
| C6   | C7   | 1.398(2)                     | C8   | C7   | 1.370(2)                     |
| C9   | C8   | 1.3929(17)                   | C10  | C11  | 1.518(2)                     |
| C10  | C15  | 1.5078(18)                   | C11  | C12  | 1.526(2)                     |
| C13  | C12  | 1.507(3)                     | C14  | C15  | 1.5219(19)                   |
| C14  | C13  | 1.510(2)                     |      |      |                              |

Table S9. Selected bond angle ( $^{\circ}$ ) of **3aa**

| atom | atom | atom | bond angle ( $^{\circ}$ ) | atom | atom | atom | bond angle ( $^{\circ}$ ) |
|------|------|------|---------------------------|------|------|------|---------------------------|
| C4   | N5   | C2   | 127.50(10)                | N6   | C3   | N5   | 110.31(10)                |

|    |    |     |            |     |     |     |            |
|----|----|-----|------------|-----|-----|-----|------------|
| C3 | N5 | C4  | 108.22(10) | N6  | C10 | C15 | 112.46(11) |
| C3 | N5 | C2  | 124.28(10) | N6  | C10 | C11 | 109.24(11) |
| C9 | N6 | C10 | 124.31(10) | C15 | C10 | C11 | 111.49(12) |
| C3 | N6 | C9  | 108.34(10) | C6  | C5  | C4  | 116.63(13) |
| C3 | N6 | C10 | 127.07(10) | C7  | C8  | C9  | 116.37(13) |
| N4 | N3 | C2  | 116.97(11) | O1  | C1  | N4  | 119.65(14) |
| N3 | N4 | C1  | 118.33(11) | O1  | C1  | N1  | 119.37(15) |
| C2 | N2 | N1  | 117.05(11) | N1  | C1  | N4  | 120.98(12) |
| N2 | N1 | C1  | 118.10(12) | C13 | C14 | C15 | 111.55(13) |
| C9 | C4 | N5  | 106.11(10) | C10 | C15 | C14 | 109.80(11) |
| C5 | C4 | N5  | 132.41(12) | C5  | C6  | C7  | 121.74(13) |
| C5 | C4 | C9  | 121.47(11) | C10 | C11 | C12 | 110.59(13) |
| N3 | C2 | N5  | 115.44(10) | C8  | C7  | C6  | 121.91(12) |
| N2 | C2 | N5  | 116.86(10) | C12 | C13 | C14 | 111.46(14) |
| N2 | C2 | N3  | 127.56(11) | C13 | C12 | C11 | 111.02(14) |
| N6 | C9 | C8  | 131.13(12) | C4  | C9  | N6  | 107.01(10) |
| C4 | C9 | C8  | 121.84(11) |     |     |     |            |

---

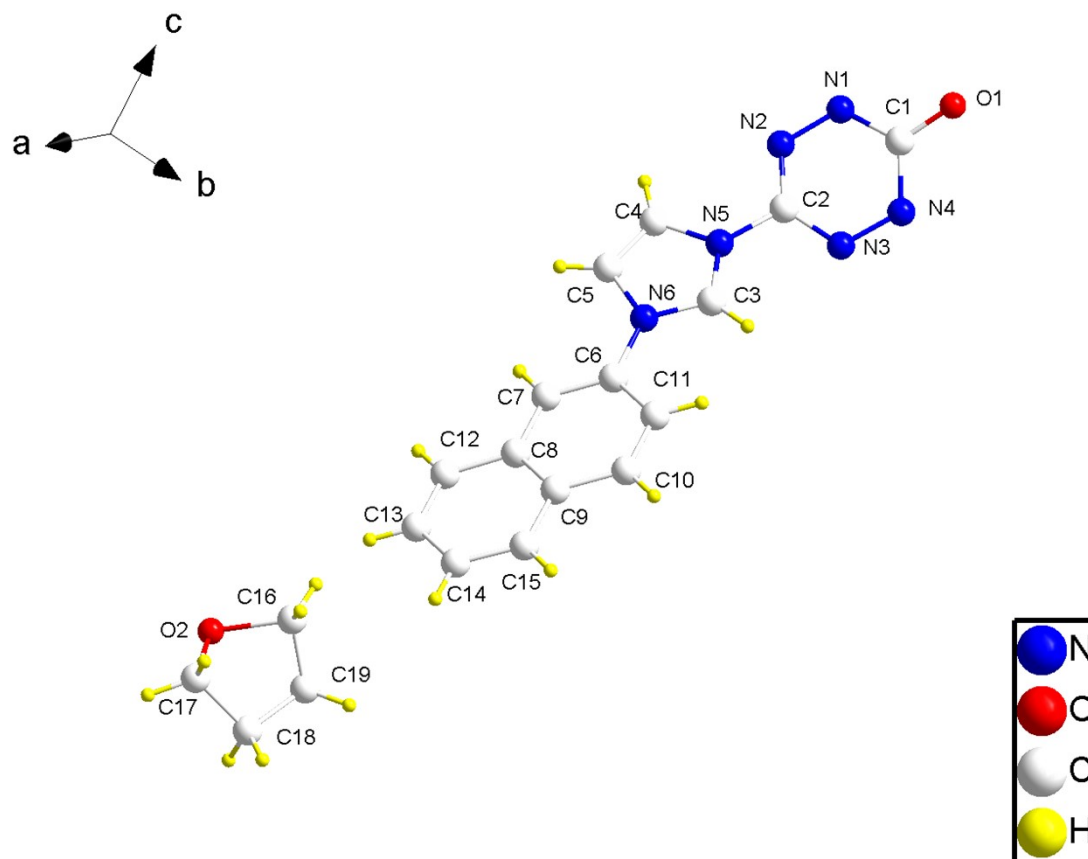

**Figure S124. X-ray structure of 3ab**

Table S10. Crystallographic data and structural corrections of **3ab**

| Complex            | <b>3ab</b>           |
|--------------------|----------------------|
| Formula            | $C_{19}H_{18}N_6O_2$ |
| Formula weight     | 362.39               |
| Temperature/K      | 294.61(10)           |
| Crystalsystem      | monoclinic           |
| Spacegroup         | $P2_1/c$             |
| $a(\text{\AA})$    | 14.0018(9)           |
| $b(\text{\AA})$    | 10.3586(5)           |
| $c(\text{\AA})$    | 12.8117(8)           |
| $\alpha(^{\circ})$ | 90                   |
| $\beta(^{\circ})$  | 105.501(7)           |
| $\gamma(^{\circ})$ | 90                   |



|                                         |                                                              |
|-----------------------------------------|--------------------------------------------------------------|
| $V(\text{\AA}^3)$                       | 1790.61(19)                                                  |
| $Z$                                     | 4                                                            |
| $\rho_{\text{calc}}/\text{cm}^3$        | 1.344                                                        |
| $F(000)$                                | 760.0                                                        |
| Reflections collected                   | 9859                                                         |
| Independent reflections                 | 3158 [ $R_{\text{int}}=0.0464$ , $R_{\text{sigma}}=0.0338$ ] |
| Goodness-of-fit on $F^2$                | 1.056                                                        |
| Final R indexes [ $I \geq 2\sigma(I)$ ] | $R_1=0.0954$ , $wR_2=0.2801$                                 |
| Final R indexes [all data]              | $R_1=0.1201$ , $wR_2=0.2988$                                 |

Table S11. Selected bond length ( $\text{\AA}$ ) of **3ab**

| atom | atom | bond length<br>( $\text{\AA}$ ) | atom | atom | bond length<br>( $\text{\AA}$ ) |
|------|------|---------------------------------|------|------|---------------------------------|
| N5   | C2   | 1.419(4)                        | C5   | C4   | 1.322(6)                        |
| N5   | C3   | 1.316(4)                        | C8   | C7   | 1.412(6)                        |
| N5   | C4   | 1.386(4)                        | C8   | C9   | 1.385(7)                        |
| N6   | C3   | 1.327(4)                        | C8   | C12  | 1.421(6)                        |
| N6   | C6   | 1.440(5)                        | C9   | C10  | 1.410(6)                        |
| N6   | C5   | 1.387(5)                        | C9   | C15  | 1.417(6)                        |
| N2   | N1   | 1.322(4)                        | C10  | C11  | 1.356(6)                        |
| N2   | C2   | 1.306(5)                        | C12  | C13  | 1.347(7)                        |
| O1   | C1   | 1.230(4)                        | C13  | C14  | 1.384(8)                        |
| N1   | C1   | 1.366(5)                        | C15  | C14  | 1.367(8)                        |
| N3   | C2   | 1.305(5)                        | O2   | C16  | 1.612(17)                       |
| N3   | N4   | 1.319(5)                        | O2   | C17  | 1.301(16)                       |
| C1   | N4   | 1.366(5)                        | C19  | C18  | 1.441(12)                       |
| C6   | C7   | 1.349(5)                        | C19  | C16  | 1.399(2)                        |
| C6   | C11  | 1.407(6)                        | C18  | C17  | 1.472(13)                       |

Table 12. Selected bond angle ( $^\circ$ ) of **3ab**

| atom | atom | atom | bond angle<br>(°) | atom | atom | atom | bond angle<br>(°) |
|------|------|------|-------------------|------|------|------|-------------------|
| C3   | N5   | C2   | 125.9(3)          | C4   | C5   | N6   | 107.9(3)          |
| C3   | N5   | C4   | 108.6(3)          | C5   | C4   | N5   | 106.9(3)          |
| C4   | N5   | C2   | 125.5(3)          | C7   | C8   | C12  | 122.0(4)          |
| C3   | N6   | C6   | 126.5(3)          | C9   | C8   | C7   | 119.7(4)          |
| C3   | N6   | C5   | 107.6(3)          | C9   | C8   | C12  | 118.4(4)          |
| C5   | N6   | C6   | 126.0(3)          | C6   | C7   | C8   | 120.2(4)          |
| C2   | N2   | N1   | 117.6(3)          | C8   | C9   | C10  | 118.5(4)          |
| N2   | N1   | C1   | 117.2(3)          | C8   | C9   | C15  | 119.6(5)          |
| C2   | N3   | N4   | 116.8(3)          | C10  | C9   | C15  | 121.9(5)          |
| N2   | C2   | N5   | 117.4(3)          | C11  | C10  | C9   | 121.7(4)          |
| N2   | C2   | N3   | 126.0(4)          | C10  | C11  | C6   | 118.9(4)          |
| N3   | C2   | N5   | 116.3(3)          | C13  | C12  | C8   | 121.2(5)          |
| N5   | C3   | N6   | 109.1(3)          | C12  | C13  | C14  | 120.3(5)          |
| O1   | C1   | N1   | 120.0(4)          | C14  | C15  | C9   | 119.9(5)          |
| O1   | C1   | N4   | 120.2(4)          | C15  | C14  | C13  | 120.6(5)          |
| N4   | C1   | N1   | 119.7(4)          | C17  | O2   | C16  | 98.3(13)          |
| N3   | N4   | C1   | 118.2(3)          | C16  | C19  | C18  | 106.8(8)          |
| C7   | C6   | N6   | 120.8(3)          | C19  | C18  | C17  | 103.6(9)          |
| C7   | C6   | C11  | 121.0(4)          | C19  | C16  | O2   | 88.1(7)           |
| C11  | C6   | N6   | 118.2(3)          | O2   | C17  | C18  | 96.3(10)          |

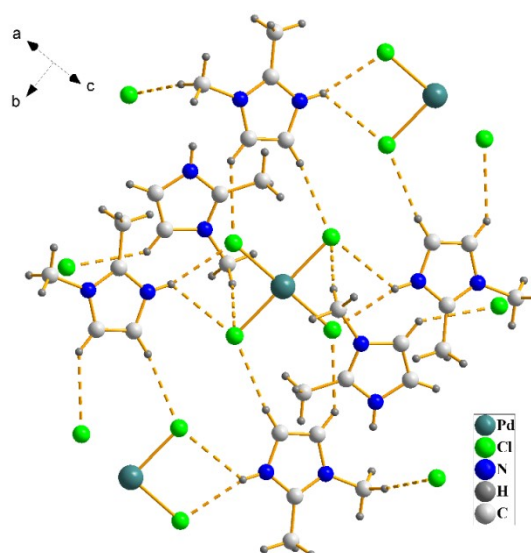

**Figure S125. X-ray single crystal structure of Pd(II)Cl<sub>4</sub> • 1,2-dimethylimidazole complex(4k)**

**Table S13. Crystallographic data and structural corrections of 4k**

| Complex                                                         | 4k                                                                |
|-----------------------------------------------------------------|-------------------------------------------------------------------|
| Formula                                                         | C <sub>10</sub> H <sub>18</sub> Cl <sub>4</sub> N <sub>4</sub> Pd |
| Formula weight                                                  | 442.48                                                            |
| T/K                                                             | 163(2)                                                            |
| Crystal system                                                  | monoclinic                                                        |
| Space group                                                     | <i>P</i> 2 <sub>1</sub> / <i>n</i>                                |
| <i>a</i> (Å)                                                    | 8.6646(17)                                                        |
| <i>b</i> (Å)                                                    | 8.0989(16)                                                        |
| <i>c</i> (Å)                                                    | 12.187(2)                                                         |
| $\alpha$ (°)                                                    | 90                                                                |
| $\beta$ (°)                                                     | 103.52(3)                                                         |
| $\gamma$ (°)                                                    | 90                                                                |
| <i>V</i> (Å <sup>3</sup> )                                      | 831.5(3)                                                          |
| <i>Z</i>                                                        | 2                                                                 |
| <i>D</i> <sub>calc</sub> /g·cm <sup>-3</sup>                    | 1.767                                                             |
| <i>F</i> (000)                                                  | 440                                                               |
| Goodness-of-fit on <i>F</i> <sup>2</sup>                        | 1.107                                                             |
| <i>R</i> <sub>int</sub>                                         | 0.0308                                                            |
| <i>R</i> <sub>1</sub> [ <i>I</i> ]2σ( <i>I</i> )] <sup>a</sup>  | 0.0390                                                            |
| <i>wR</i> <sub>2</sub> [ <i>I</i> ]2σ( <i>I</i> )] <sup>b</sup> | 0.1043                                                            |
| <i>R</i> <sub>1</sub> (all data) <sup>a</sup>                   | 0.0411                                                            |
| <i>wR</i> <sub>2</sub> (all data) <sup>b</sup>                  | 0.1064                                                            |

**Table S14. Selected bond length (Å) of 4k**

| atom | atom | bond length<br>(Å) | atom | atom | bond length<br>(Å) |
|------|------|--------------------|------|------|--------------------|
|------|------|--------------------|------|------|--------------------|

|     |     |            |     |     |            |
|-----|-----|------------|-----|-----|------------|
| Pd1 | Cl1 | 2.3041(10) | Pd1 | Cl2 | 2.3090(11) |
| N2  | C1  | 1.297(5)   | N2  | C2  | 1.365(6)   |
| N2  | C5  | 1.478(5)   | N1  | C1  | 1.334(5)   |
| N1  | C3  | 1.369(5)   | C1  | C4  | 1.337(3)   |
| C2  | C3  | 1.328(7)   |     |     |            |

Table 15. Selected bond angle (°) of **4k**

| atom | atom | atom | bond angle (°) | atom | atom | atom | bond angle (°) |
|------|------|------|----------------|------|------|------|----------------|
| Cl1  | Pd1  | Cl1  | 180.0          | Cl1  | Pd1  | Cl2  | 91.06(3)       |
| Cl2  | Pd1  | Cl2  | 180.0          | C1   | N2   | C2   | 109.4(3)       |
| C1   | N2   | C5   | 124.9(4)       | C2   | N2   | C5   | 125.6(4)       |
| C1   | N1   | C3   | 109.1(3)       | N2   | C1   | N1   | 107.6(3)       |
| N2   | C1   | C4   | 127.6(3)       | N1   | C1   | C4   | 124.8(4)       |
| C3   | C2   | N2   | 107.7(4)       | C2   | C3   | N1   | 106.2(3)       |

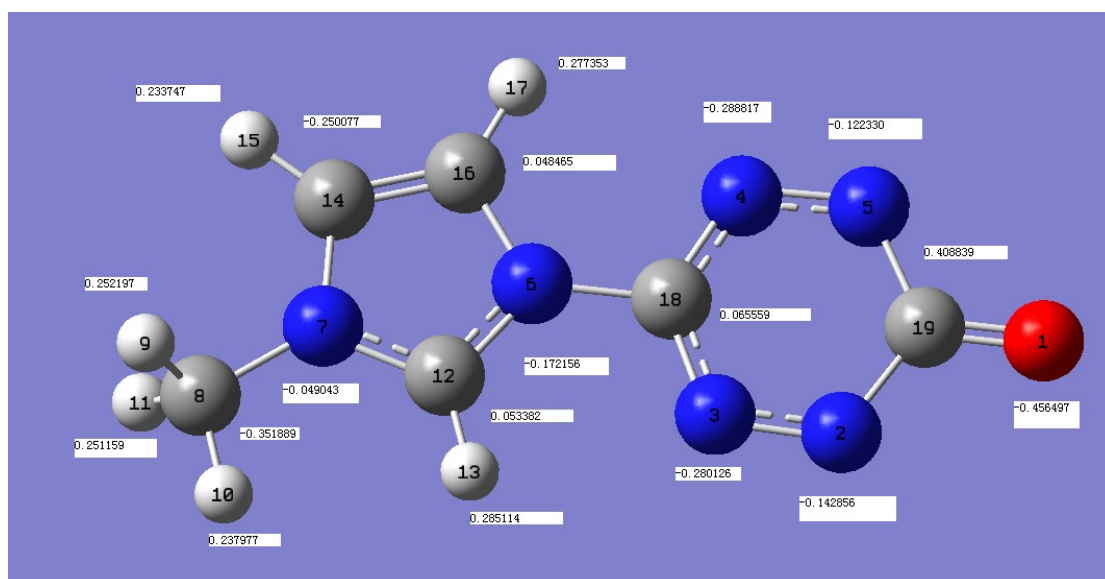

Figure S126. Charge density maps of each atom in **3a** calculated from the B3LYP functional and the 6-31+G\* basis set in Gaussian03 program
